# Supplementary material for: Designing a Cr-catalyst bearing redox non-innocent phenalenyl-based ligand towards hydrosilylative CO2 functionalization
Source: Royal Society of Chemistry journal article supplement (doi:10.1039/d0cc05348a), 2020-01-01
Supplement: d0cc05348a1.pdf [file d0cc05348a1.pdf]

## Supporting information

### Designing a Cr-catalyst Bearing Redox Non-innocent Phenalenyl-Based Ligand towards Hydrosilylative CO<sub>2</sub> Functionalization

*Soumi Chakraborty, Arpan Das, Jasimuddin Ahmed, Sayani Barman and Swadhin K. Mandal\**

Department of Chemical Sciences, Indian Institute of Science Education and Research-  
Kolkata, Mohanpur-741246, India.

\*E-mail: [swadhin.mandal@iiserkol.ac.in](mailto:swadhin.mandal@iiserkol.ac.in)

#### Contents:

|       |                                                 |         |
|-------|-------------------------------------------------|---------|
| I.    | General considerations and instrumentations.    | S2      |
| II.   | Experimental procedure.                         | S3-S17  |
| III.  | Characterization of N-formyl amide compounds.   | S19-S26 |
| IV.   | Spectroscopic characterization of Cr-complex.   | S27-S28 |
| V.    | X-ray crystallographic details.                 | S28-S30 |
| VI.   | Computational details.                          | S31-S43 |
| VII.  | <sup>1</sup> H and <sup>13</sup> C NMR spectra. | S44-S63 |
| VIII. | References.                                     | S64     |

## I. General considerations and instrumentations.

All catalytic and controlled reactions were performed under oxygen free atmosphere (Argon or nitrogen) using standard Schlenk techniques or inside a glovebox. All solvents used in the experiments were dried over a sodium/benzophenone mixture or CaH<sub>2</sub> and distilled prior to use. All chemicals were purchased from Sigma-Aldrich or Merck or Spectrochem or Alfa Aesar and used as received. Analytical thin layer chromatography (TLC) was performed on a Merck 60 F254 silica gel plate (0.25 mm thickness). Column chromatography was performed on Merck 60 silica gel (100-200 mesh). The <sup>1</sup>H and <sup>13</sup>C NMR spectra were recorded on JEOL ECS 400 MHz spectrometer and on a Bruker Avance III 500 MHz spectrometer in CDCl<sub>3</sub> or DMSO-d<sub>6</sub> with residual undeuterated solvent (eg. CDCl<sub>3</sub>, 7.26/77.0) as an internal standard. Chemical shifts (δ) are given in ppm, and *J* values are given in Hz. All chemical shifts were reported in ppm using tetramethylsilane as a reference. Chemical shifts (δ) downfield from the reference standard were assigned positive values. Evaporation of solvents was performed under reduced pressure using a rotary evaporator. High-resolution mass spectra (HRMS) were obtained on a Bruker maXis impact. EPR spectroscopic measurements were performed in Bruker (X-band) spectrometer. All the glassware and NMR tubes used for experiments were kept in oven at 120 °C for overnight (12h). X-ray crystallographic measurements were performed in Agilent X-ray diffractometer. Cyclic voltammetry was performed with glassy carbon and platinum wire electrodes, Ag/AgCl reference electrode, tetrabutylammonium perchlorate electrolyte, under N<sub>2</sub> atmosphere. Carbon dioxide was purchased from Praxair in a 5.5 purity gas cylinder with 99.995% purity. The ligands 9-methoxy-1H-phenalen-1-one and 9-methoxy-1H-phenalen-1-one were synthesized following reported literature.<sup>1-2</sup>

## II. Experimental Procedures.

### a) Synthetic Procedure of 9-((pyridin-2-ylmethyl)amino)-1H-phenalen-1-one (1).

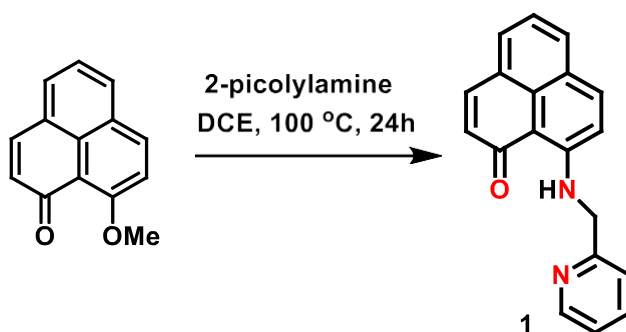

The synthesis of **1** was accomplished by the treatment of 1 equiv. of 9-methoxy-1H-phenalen-1-one (1.1g) with 1.5 equiv. of 2-picolylamine (0.9 mL) in 1,2-dichloroethane under a reflux condition for 24 h. After completion of reaction, the solvent was evaporated under a vacuum and reaction mixture was purified by column chromatography with neutral alumina by 50% DCM in hexane. Analytically pure orange colored crystals of **1** were obtained in 60% isolated yield (0.87g) from a concentrated THF-hexane solution at room temperature. Also, it was characterized by NMR spectroscopy and HRMS technique.  $^1\text{H-NMR}$  ( $\text{CDCl}_3$ , 400MHz, rt): 12.68 (1H, s), 8.62-8.64 (1H, d,  $J=8\text{Hz}$ ), 7.92-7.94 (1H, d,  $J=8\text{Hz}$ ), 7.84-7.87 (3H, m), 7.60-7.64 (1H, m), 7.40-7.44 (1H, t), 7.34-7.36 (1H, d,  $J=8.0\text{Hz}$ ), 7.20-7.21 (1H, m), 7.15-7.17 (1H, m), 7.00-7.02 (1H, m), 4.91-4.92 (2H, d,  $J=4\text{Hz}$ ) ppm;  $^{13}\text{C-NMR}$  ( $\text{CDCl}_3$ , 125 MHz, rt): 184.74, 157.33, 155.90, 149.52, 138.44, 136.99, 131.83, 131.46, 128.90, 128.16, 125.15, 124.41, 122.43, 121.92, 121.05, 114.63, 108.55, 48.47 ppm. HRMS calculated for  $\text{C}_{19}\text{H}_{14}\text{N}_2\text{ONa}$  [ $\text{M} + \text{Na}$ ] $^+$  309.1004, found 309.1079 (Fig. S1).

## Display Report

### Analysis Info

Analysis Name D:\Data\User data\2019\NOV\SKM-SC-4.d  
Method Tune\_pos\_Standard.m  
Sample Name SKM-SC-4  
Comment

Acquisition Date 11/19/2019 2:34:35 PM

Operator IISER Kalyani  
Instrument maXis impact 8282001.00127

### Acquisition Parameter

|             |          |                      |          |                  |           |
|-------------|----------|----------------------|----------|------------------|-----------|
| Source Type | ESI      | Ion Polarity         | Positive | Set Nebulizer    | 0.3 Bar   |
| Focus       | Active   | Set Capillary        | 3400 V   | Set Dry Heater   | 200 °C    |
| Scan Begin  | 50 m/z   | Set End Plate Offset | -500 V   | Set Dry Gas      | 4.0 l/min |
| Scan End    | 1000 m/z | Set Charging Voltage | 2000 V   | Set Divert Valve | Source    |
|             |          | Set Corona           | 0 nA     | Set APCI Heater  | 0 °C      |

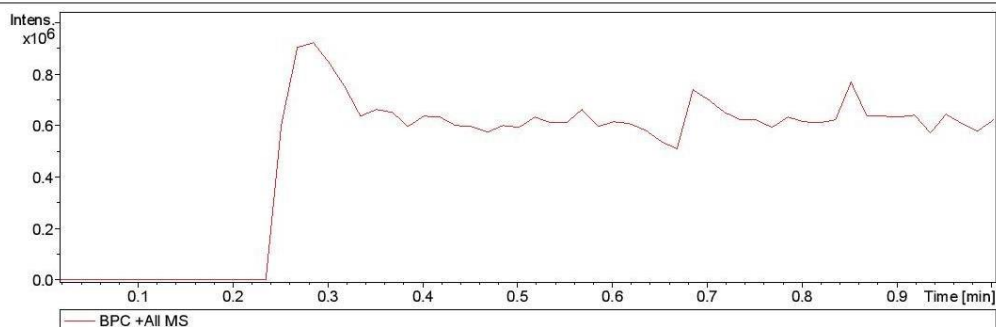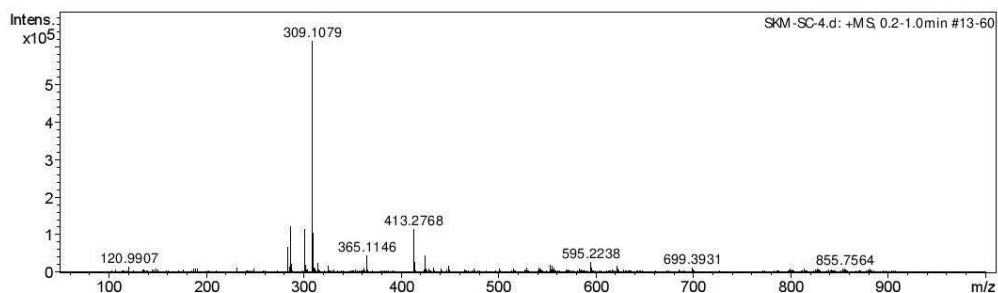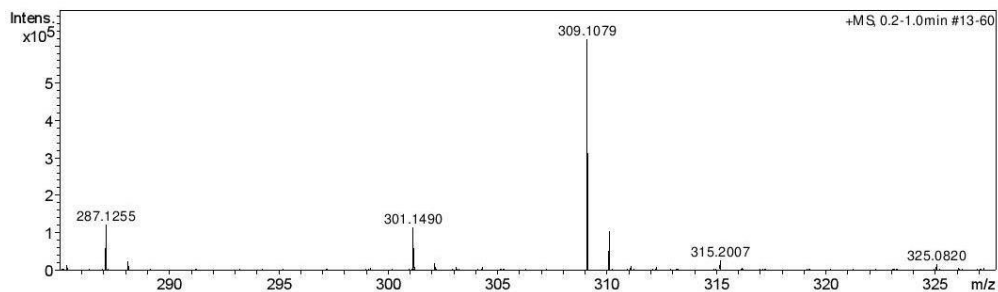

SKM-SC-4.d

Bruker Compass DataAnalysis 4.1

printed: 11/19/2019 2:40:29 PM

by: IISER Kalyani

Page 1 of 1

**Fig. S1** HRMS spectrum for N,N,O-PLY ligand (**1**).

b) Synthetic Procedure of Cr-complex (2).

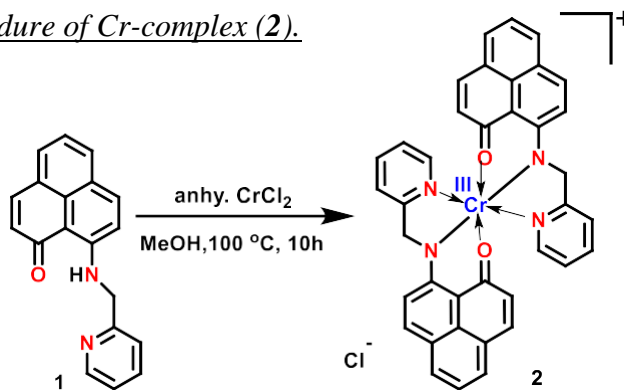

In open atmosphere, a 100 mL round bottom flask, **1** (0.3 g, 1.04 mmol) was dissolved in 20 mL MeOH upon heating at 60 °C. Separately, a 50 mL conical flask was taken and anhydrous CrCl<sub>2</sub> (0.064 g) was dissolved in 10 mL MeOH. To the hot methanolic solution of **1**, the solution of CrCl<sub>2</sub> dissolved in methanol was added dropwise. The orange solution was changed to reddish and finally turned to a dark red solution. The reaction mixture was stirred with heating at 100 °C for another 10 h, and filtered in hot condition through a Whatman-1 filter paper. The filtrate was kept for 8-10 h to form crystalline dark red compound. The mother liquor was transferred, red crystals were washed with MeOH and dried. Crystals suitable for SCXRD were grown from concentrated methanolic solution layer with DCM of the crystalline material at room temperature for one week. The complex was characterized by UV-vis, EPR, IR spectroscopy, cyclic voltammetry and X-ray diffraction study. IR (400-2000 cm<sup>-1</sup>): 1624, 1576, 1498, 1414, 1348, 1284, 1240, 1186, 1164, 1134, 1052, 974, 950, 872, 844, 814, 760, 678, 684, 520. Anal. calculated for C<sub>38</sub>H<sub>26</sub>ClCrN<sub>4</sub>O<sub>2</sub>·(C<sub>2</sub>H<sub>10</sub>O<sub>2</sub>): C, 66.34; H, 5.01; N 7.74. Found: C, 65.96; H, 4.53; N, 7.43. The calculated molecular formula was determined from crystallographically determined unit which contains lattice held methanol and water molecules. HRMS calculated for [C<sub>38</sub>H<sub>26</sub>ClCrN<sub>4</sub>O<sub>2</sub>] [M - Cl]<sup>+</sup>: m/z 622.1455. Found: 622.1440 (data recorded in positive ion polarity mode). (Fig. S2).

## Display Report

### Analysis Info

Analysis Name D:\Data\User data\2020\AUG\SKM-SC-C2.d  
Method Tune\_pos\_Mid.m  
Sample Name SKM-SC-C2  
Comment

Acquisition Date 8/4/2020 12:32:54 PM

Operator IISER Kolkata  
Instrument maXis impact 8282001.00127

### Acquisition Parameter

|             |          |                      |          |                  |           |
|-------------|----------|----------------------|----------|------------------|-----------|
| Source Type | ESI      | Ion Polarity         | Positive | Set Nebulizer    | 0.4 Bar   |
| Focus       | Active   | Set Capillary        | 3400 V   | Set Dry Heater   | 200 °C    |
| Scan Begin  | 50 m/z   | Set End Plate Offset | -500 V   | Set Dry Gas      | 4.0 l/min |
| Scan End    | 3000 m/z | Set Charging Voltage | 2000 V   | Set Divert Valve | Source    |
|             |          | Set Corona           | 0 nA     | Set APCI Heater  | 0 °C      |

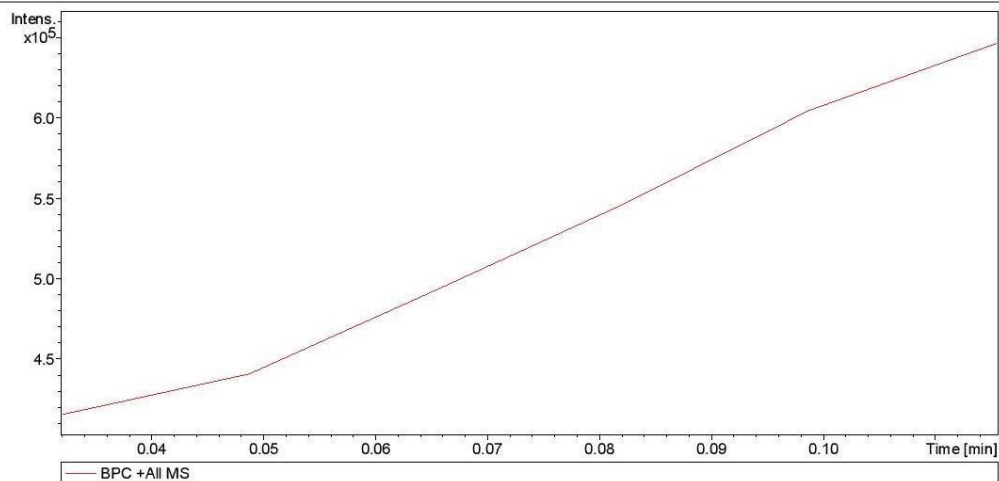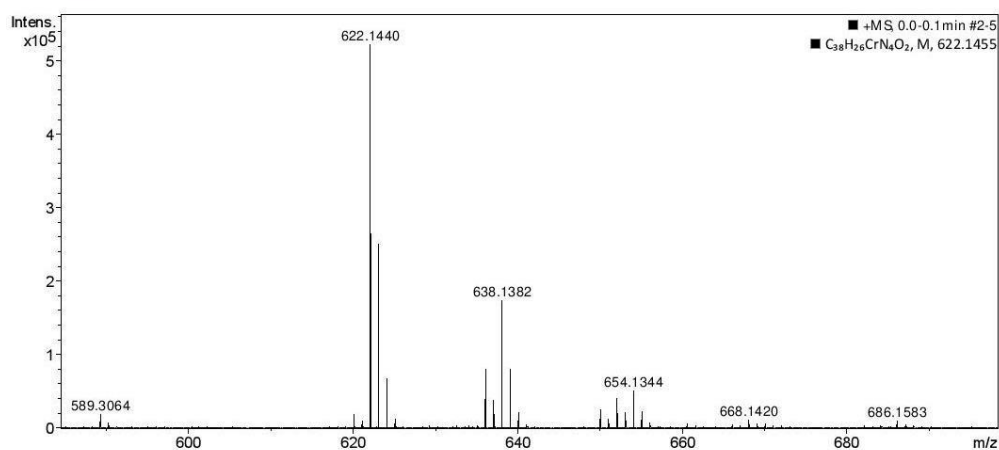

SKM-SC-C2.d

Bruker Compass DataAnalysis 4.1

printed: 8/4/2020 12:38:55 PM

by: IISER Kolkata

Page 1 of 1

**Fig. S2** HRMS spectrum (recorded in positive ion polarity mode) for Cr(III)-complex (**2**).

c) Procedure for isolation of first reduced species of Cr-complex 2 (2A).

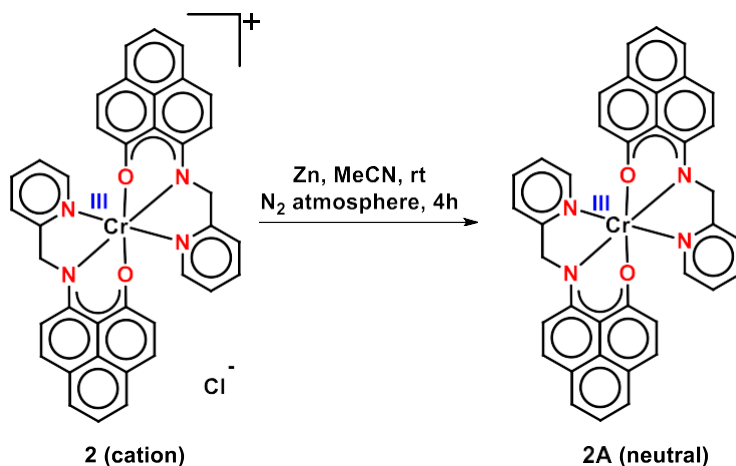

In nitrogen filled glove-box, **2** (30 mg, 0.04 mmol) and Zn powder (2.6 mg, 0.04 mmol) were mixed with 10 mL acetonitrile in a 30 mL vial equipped with a stir bar and stirred for 4 hours at room temperature. Thereafter the solution was filtered through a small celite plug. The red colored filtrate was layered with THF and diethyl ether and kept at room temperature for crystallization. Red colored block shaped single crystals were obtained on overnight standing. A suitable crystal was coated with inert oil and was analyzed by single crystal X-ray diffraction. IR (400-2000  $\text{cm}^{-1}$ ): 1628, 1580, 1492, 1460, 1404, 1344, 1282, 1240, 1184, 1158, 1136, 1102, 1050, 976, 944, 846, 806, 766, 678, 660, 520. HRMS calculated for  $\text{C}_{38}\text{H}_{26}\text{CrN}_4\text{O}_2$   $[\text{M}]^+$ :  $m/z$  622.1455. Found: 622.1449 (Fig. S3). Due to moisture sensitivity of the compound, elemental analysis experiment of **2A** was unsuccessful.

## Display Report

### Analysis Info

Analysis Name D:\Data\User data\2020\AUG\SKM-SC-C2A.d  
Method Tune\_pos\_Mid.m  
Sample Name SKM-SC-C2A  
Comment

Acquisition Date 8/4/2020 12:13:56 PM

Operator IISER Kolkata  
Instrument maXis impact 8282001.00127

### Acquisition Parameter

|             |          |                      |          |                  |           |
|-------------|----------|----------------------|----------|------------------|-----------|
| Source Type | ESI      | Ion Polarity         | Positive | Set Nebulizer    | 0.4 Bar   |
| Focus       | Active   | Set Capillary        | 3400 V   | Set Dry Heater   | 200 °C    |
| Scan Begin  | 50 m/z   | Set End Plate Offset | -500 V   | Set Dry Gas      | 4.0 l/min |
| Scan End    | 3000 m/z | Set Charging Voltage | 2000 V   | Set Divert Valve | Source    |
|             |          | Set Corona           | 0 nA     | Set APCI Heater  | 0 °C      |

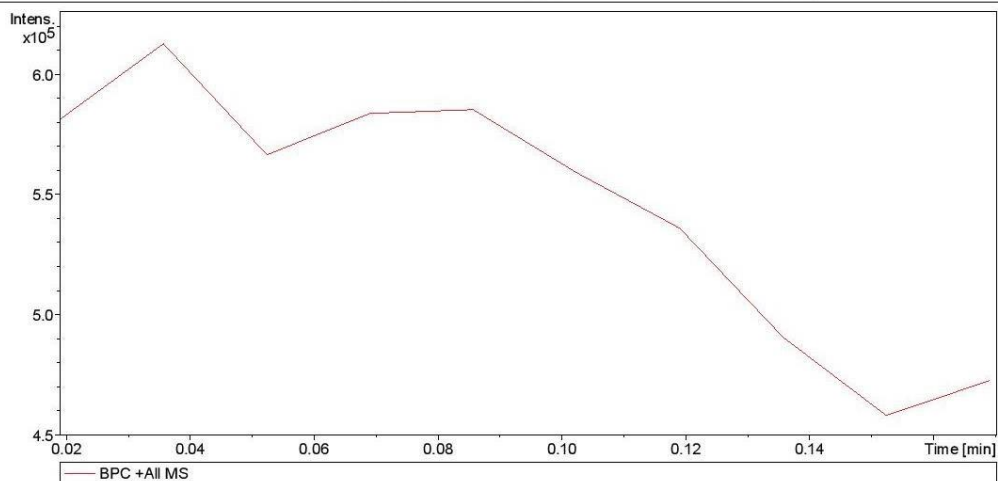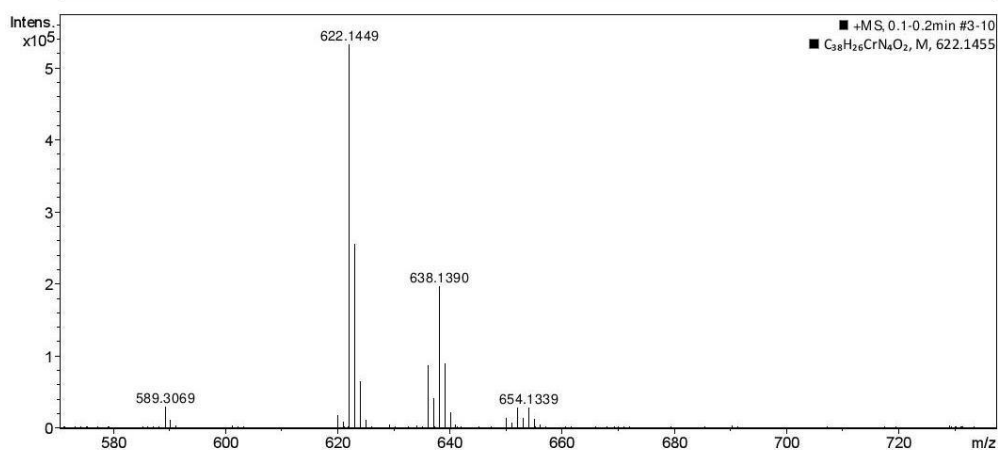

SKM-SC-C2A.d

Bruker Compass DataAnalysis 4.1

printed: 8/4/2020 12:17:55 PM

by: IISER Kolkata

Page 1 of 1

**Fig. S3** HRMS spectrum for neutral Cr-complex (2A).



d) Procedure for isolation of second reduced species of Cr-complex **2** (**2B**).

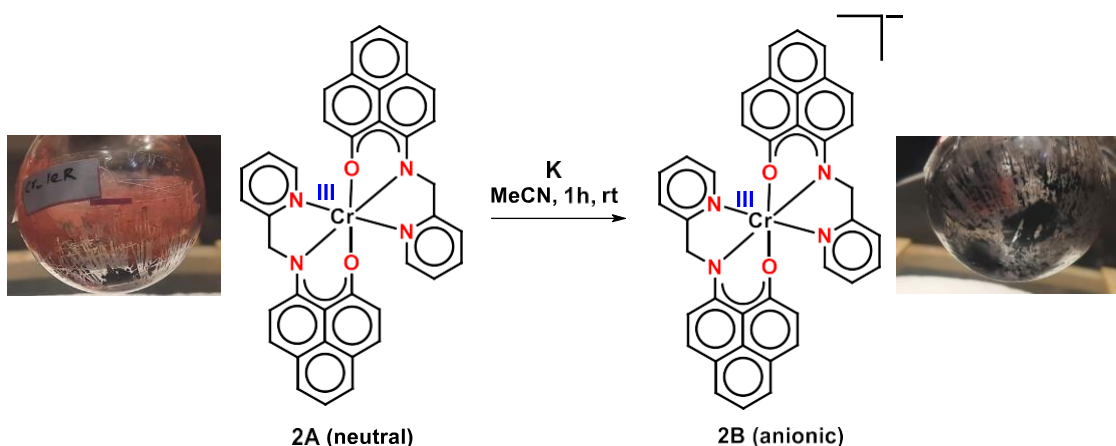

In a nitrogen filled glovebox, 1 equiv. of both **2** (50 mg, 0.07 mmol) and Zn powder (5 mg, 0.07 mmol) were mixed in acetonitrile. After 4 hours stirring at room temperature, the reaction mixture was filtered. Filtrate was collected in a 50 mL Schlenk flask equipped with a stir bar and treated with 1 equiv. of potassium (3 mg, 0.07 mmol). Colour of the reaction mixture turned deep green immediately. It was stirred at room temperature for 2-4 hours and finally dried over vacuum to obtain a dark green solid. This green solid was highly air and moisture sensitive and stored inside glovebox at room temperature. Alternatively, synthesis of **2B** was done by treating **2** and potassium in 1:2 ratio in dry and distilled acetonitrile inside a nitrogen filled glovebox by stirring at room temperature for 4 hours. After that, reaction mixture was dried over high vacuum to obtain **2B**.

e) General Procedure for optimization of CO<sub>2</sub> functionalization.

In a nitrogen filled glovebox, **2** (5 mol%) and a suitable reductant (10 mol%) were taken in a 15mL high pressure J-Young tube with teflon cap equipped with a stir bar. 800 $\mu$ L acetonitrile was added to that and kept for stirring for 20min. at room temperature. Silane (2 equiv.) was added to it followed by benzamide (1 equiv.) The tube was closed properly and took out from glovebox. In Schlenk line freeze-pump thaw was done twice to evacuate any gasses present.

Then CO<sub>2</sub> was charged at 1 atm pressure. Tube was closed properly and kept for stirring at room temperature for 12 hours. After completion, the reaction mixture was dried completely and exposed to air. Product was isolated through silica column with 10% EtOAc-hexane mixture and characterized by <sup>1</sup>H and <sup>13</sup>C NMR spectroscopy. Yield was calculated with respect to benzamide. By varying different silane and reductant, the reaction condition was optimized.

**Table S1.** Optimization of formylation reaction condition using catalytic amount of **2**.

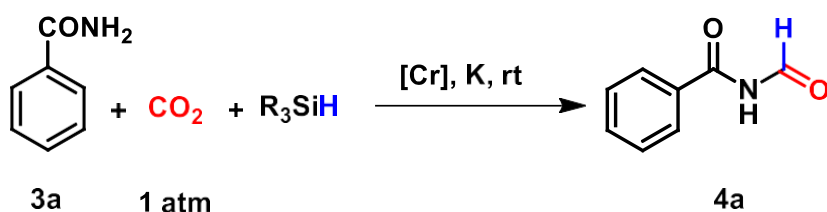

[Cr]-catalyst used:

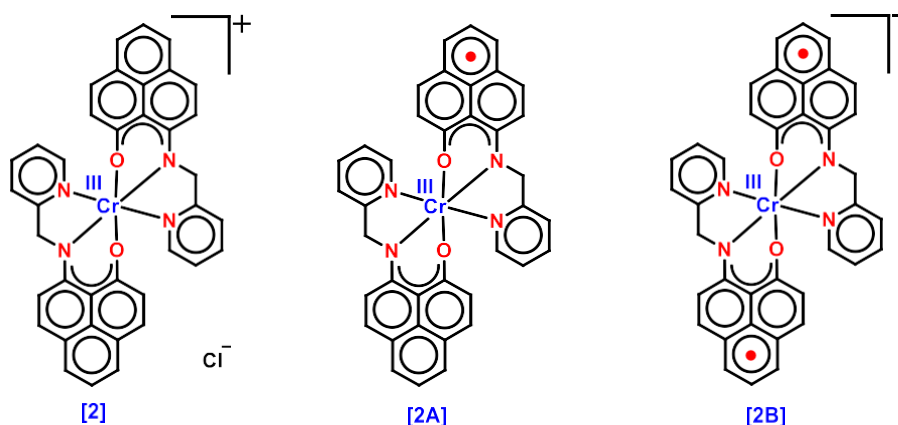

| Entry | Silane (equiv.)        | [Cr] (mol%)   | K (mol%) | Isolated Yield (%) |
|-------|------------------------|---------------|----------|--------------------|
| 1     | PhSiH <sub>3</sub> (2) | <b>2</b> (5)  | K (10)   | 80                 |
| 2     | PhSiH <sub>3</sub> (2) | <b>2</b> (5)  | -        | -                  |
| 3     | PhSiH <sub>3</sub> (2) | -             | K (10)   | 25                 |
| 4     | PhSiH <sub>3</sub> (2) | <b>2A</b> (5) | -        | -                  |
| 5     | PhSiH <sub>3</sub> (2) | <b>2A</b> (5) | K (5)    | 75                 |
| 6     | PhSiH <sub>3</sub> (2) | <b>2B</b> (5) | -        | 76                 |
| 7     | PhSiH <sub>3</sub> (2) | <b>2</b> (5)  | K (10)   | 65 (in THF)        |

|           |                                        |              |        |              |
|-----------|----------------------------------------|--------------|--------|--------------|
| <b>8</b>  | Ph <sub>2</sub> SiH <sub>2</sub> (2)   | <b>2</b> (5) | K (10) | -            |
| <b>9</b>  | PMHS (2)                               | <b>2</b> (5) | K (10) | -            |
| <b>10</b> | Et <sub>3</sub> SiH (2)                | <b>2</b> (5) | K (10) | -            |
| <b>11</b> | Me <sub>2</sub> HSiOSiHMe <sub>2</sub> | <b>2</b> (5) | K (10) | -            |
| <b>12</b> | PhSiH <sub>3</sub> (2)                 | <b>2</b> (5) | K (10) | 78 (in dark) |

f) General Procedure for catalytic CO<sub>2</sub> functionalization.

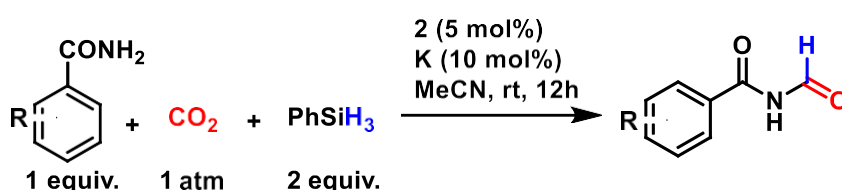

In a nitrogen filled glovebox, **2** (5 mol%) and potassium (10 mol%) were taken in a 15mL high pressure J-Young tube with teflon cap equipped with a stir bar. 800  $\mu$ L acetonitrile was added to the reaction mixture and kept for stirring for 20 min. at room temperature. Phenylsilane (2 equiv.) was added to it followed by addition of arylbenzamide (1 equiv.). The tube was closed properly and was taken out from glovebox. In the Schlenk line, freeze-pump-thaw cycle was applied twice to evacuate any inert gas present. Next CO<sub>2</sub> was purged to the reaction mixture. Reaction tube was closed properly and was kept for stirring at room temperature for 12 hours. After completion, the reaction mixture was dried completely and exposed to air. Product was isolated through silica column with EtOAc-hexane mixture and characterized by <sup>1</sup>H and <sup>13</sup>C NMR spectroscopy.

g) Procedure for catalytic CO<sub>2</sub> functionalization in presence of radical scavengers.

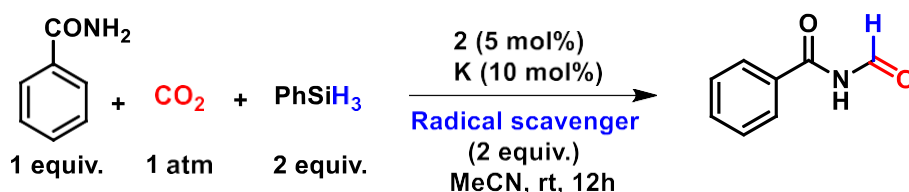

**Table S2.** Controlled reaction in presence of radical scavenger.

| Entry | Radical scavenger       | Yield |
|-------|-------------------------|-------|
| 1     | TEMPO                   | <10 % |
| 2     | Galvinoxyl free radical | -     |

In a nitrogen filled glovebox, catalyst **2** (5 mol%) and potassium (10 mol%) were taken in a 15mL high pressure J-Young tube with teflon cap equipped with a stir bar. 800 $\mu$ L acetonitrile was added to that and kept for stirring for 20 min. at room temperature. Phenylsilane (2 equiv.) was added to it followed by addition of benzamide (1 equiv.) and a radical scavenger (2 equiv.). The tube was closed properly and was taken out from glovebox. In Schlenk line, freeze-pump thaw was done twice to evacuate the tube. Then CO<sub>2</sub> was charged at 1 atm pressure. Tube was closed properly and kept for stirring at room temperature for 12 hours. After completion, the reaction mixture was dried completely and exposed to air. Product was isolated through silica column with 10% EtOAc-hexane mixture isolated yield was determined.

*h) Procedure for characterization of siloxane as a side product.*

in a nitrogen filled glovebox, Cr-catalyst (**2**, 5 mol%) and potassium (10 mol%) were taken in acetonitrile within a 15mL high pressure J-Young tube with teflon cap equipped with a stir bar. 4-Methylbenzamide (0.3 mmol) and triphenylsilane (0.3 mmol) was added to it. The tube was closed properly and taken out from the glovebox. In Schlenk line, freeze-pump thaw was done

twice to evacuate the inside gas. CO<sub>2</sub> was charged at 1 atm pressure. Tube was closed properly and kept for stirring at room temperature for 24 hours. After completion the reaction mixture was dried and <sup>1</sup>H NMR spectroscopy of the reaction mixture was recorded in CDCl<sub>3</sub>. No peak at 5.1 indicates no unreacted silane present, however unreacted amide and relevant silyl ether peaks can be identified from the aromatic region.

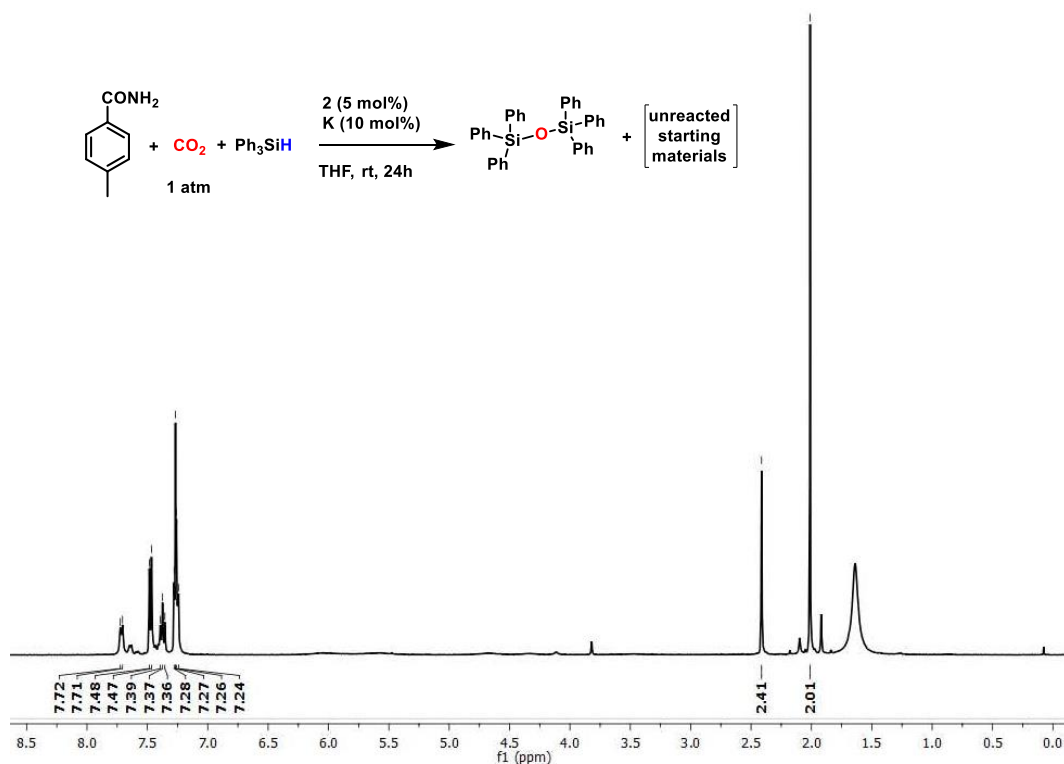

**Fig. S4** <sup>1</sup>H NMR spectrum indication formation of siloxane.

Further, to characterize silyl ether, in a nitrogen filled glovebox, Cr-catalyst (**2**, 5 mol%) and potassium (10 mol%) were taken in a 15mL high pressure J-Young tube with teflon cap equipped with a stir bar. 800 μL THF was added to that and kept for stirring for 4h at room temperature. Triphenylsilane (10 equiv. wrt **2**) was added to it. The tube was closed properly and taken out from the glovebox. In Schlenk line, freeze-pump thaw was done twice to evacuate the inside

gases. Then CO<sub>2</sub> was charged at 1 atm pressure. Tube was closed properly and kept for stirring at room temperature for 24 hours. After completion the reaction mixture was dried and taken back to glovebox. It was next dissolved in THF and was kept at room temperature. On standing overnight, colorless crystals were observed and characterized by NMR spectroscopy to determine the siloxane (1,1,1,3,3,3- hexaphenyldisiloxane) side product. <sup>1</sup>H-NMR (400 MHz, CDCl<sub>3</sub>, 298 K) δ (ppm) 7.46-7.44 (m, 2H), 7.37-7.33 (m, 1H). 7.24-7.22 (m, 2H). <sup>13</sup>C NMR (100 MHz, CDCl<sub>3</sub>, 298 K) δ (ppm) 135.4, 135.1, 129.7, 127.6. <sup>29</sup>Si-NMR<sup>5</sup> (100 MHz, CDCl<sub>3</sub>, 298 K) δ (ppm) -18.6.

### Procedures to trap reaction intermediates by mass spectroscopy.

#### i) Procedure for characterization of TEMPO-trapped silyl radical intermediate (5).

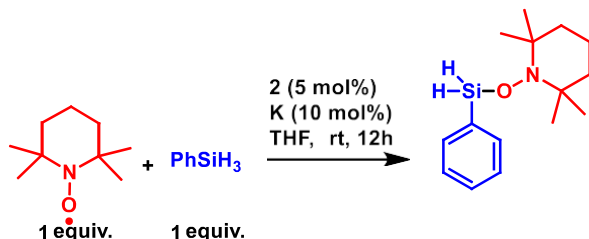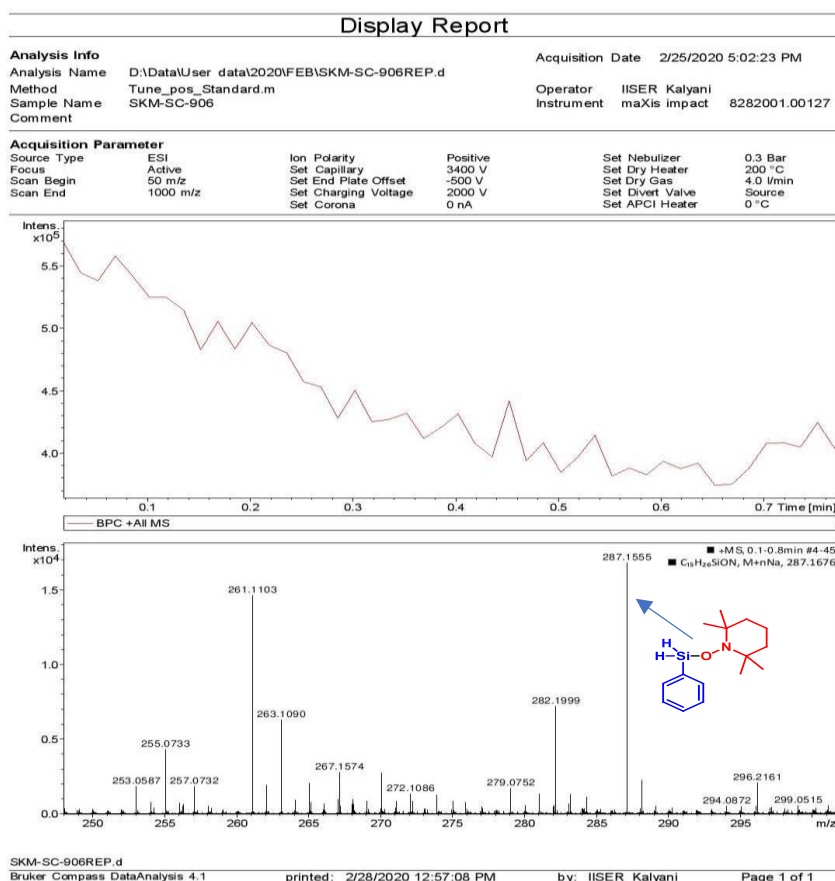

**Fig. S5.** HRMS data recorded for detecting TEMPO-trapped silyl radical.

In a nitrogen filled glovebox, **2** (5 mol%) and potassium (10 mol%) were taken in a 15mL high pressure J-Young tube with teflon cap equipped with a stir bar. 800  $\mu$ L THF was added to that and kept for stirring for 4 hours at room temperature. Phenylsilane (1 equiv.) and TEMPO (1 equiv.) were added to it and continued to stir for 12 hours. After completion, the reaction mixture was dried completely and analysed by HRMS technique to detect the TEMPO-trapped silyl radical species.

j) Procedure for trapping silyl-formate intermediate (**6**).

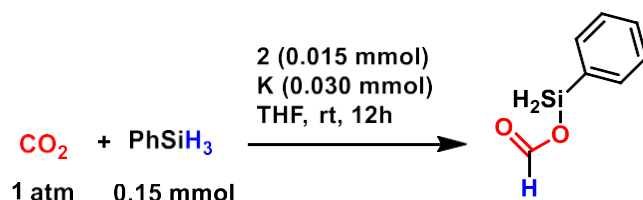

(a)

Peak Analysis Report

|                    |                     |                   |         |
|--------------------|---------------------|-------------------|---------|
| Sample Name:       | SC821               | Injection Volume: | 1.00    |
| Injection Type:    | Unknown             | Dilution Factor:  | 1.0000  |
| Instrument Method: | Others Lab Method   | Operator:         | ISQ7000 |
| Inj. Date / Time:  | 04-Dec-2019 / 20:30 | Run Time:         | 15.00   |

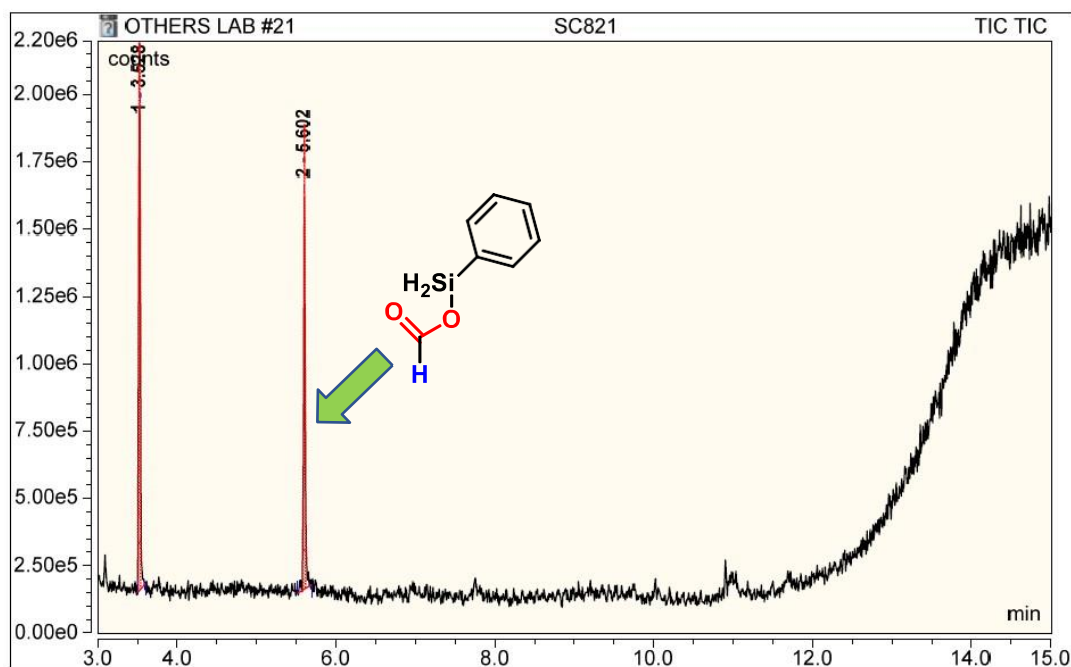

| No. | Time min | Peak Name | Width min | Height counts | Resol. (USP) | Resol. (EP) | Plates (USP) | Plates (EP) | Asymmetry |
|-----|----------|-----------|-----------|---------------|--------------|-------------|--------------|-------------|-----------|
| 1   | 3.528    |           | 0.029     | 1801224.847   | 71.326       | 71.182      | 232750       | 227582      | 1.158     |
| 2   | 5.602    |           | 0.029     | 1457524.682   | n.a.         | n.a.        | 600153       | 602546      | 1.274     |
|     |          | AVERAGE:  | 0.029     | 1,629,374.764 | 71.326       | 71.182      | 416,452.     | 415,064.    | 1.216     |

(b)

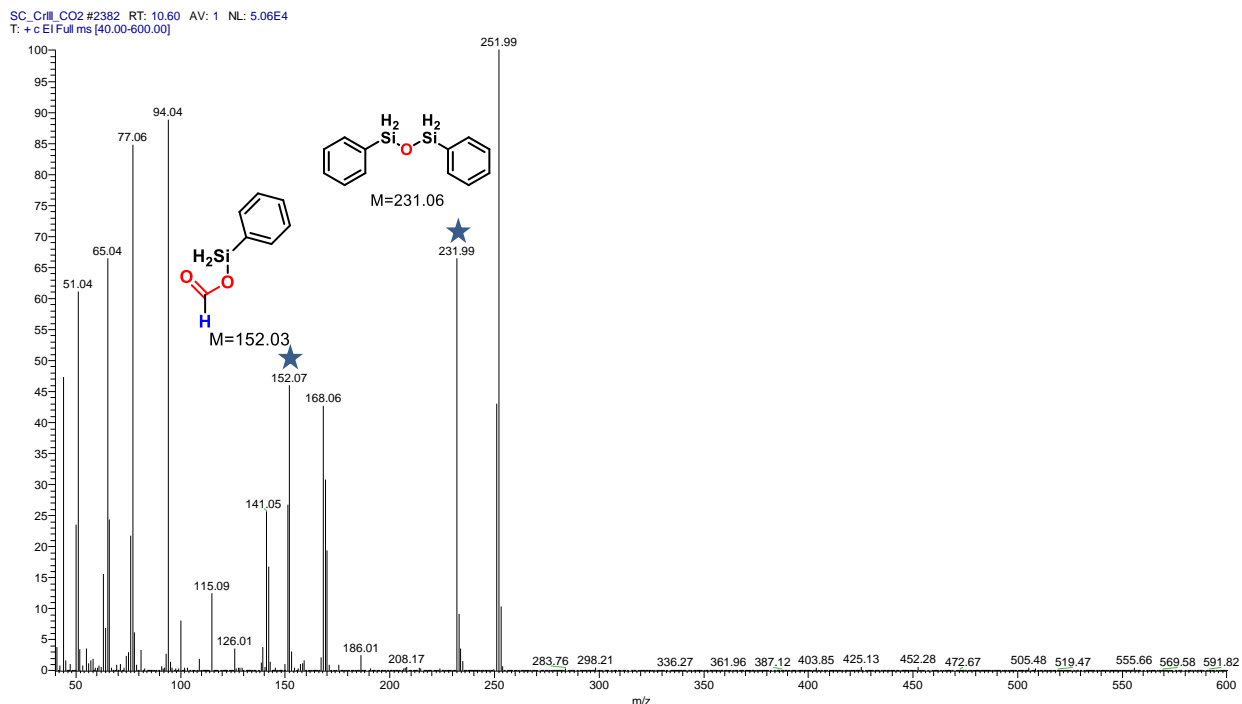

**Fig. S6.** (a) Retention time graph and (b) corresponding mass spectroscopic plot in GC supporting formation of silyl formate.

In a nitrogen filled glovebox, **2** (5 mol%) and potassium (10 mol%) were taken in a 15mL high pressure J-Young tube with teflon cap equipped with a stir bar. 800 $\mu$ L THF was added to that and kept for stirring for 4 hours at room temperature. Phenylsilane (10 equiv. wrt to catalyst) was added to it. The tube was closed properly and took out from glovebox. In Schlenk line, freeze-pump thaw was done twice to evacuate the inside gasses. Then CO<sub>2</sub> was charged at 1 atm pressure. Tube was closed properly and kept for stirring at room temperature for 12 hours. After completion the reaction mixture was dried completely and taken back to glove box. The reaction mixture was analysed by GC technique (in acetonitrile) to find the mass for silyl formate. Along with formate, formation of siloxane (PhH<sub>2</sub>SiOSiH<sub>2</sub>Ph) as co-product has been noted.



k) Procedure for trapping silyl-formate intermediate with DMMS:

In a nitrogen filled glovebox, **2** (0.015 mmol) and potassium (0.03 mmol) were taken in a vial in MeCN (0.8 mL) and stirred for 2-3 minutes. It was then allowed to settle down and the upper clear solution portion was transferred to a 15 mL J-Young tube with teflon cap followed by addition of dimethoxy(methyl)silane (DMMS) (0.15 mmol). Tube was closed and freeze-pump-thaw was done twice. CO<sub>2</sub> was charged and the reaction was allowed to stir at room temperature for 4h. Reaction mixture was dried over vacuum and NMR spectroscopy was recorded in CDCl<sub>3</sub>. Characteristic peaks of silyl formate was observed in <sup>1</sup>H (8.10 ppm)<sup>3</sup> and <sup>13</sup>C (160.4 ppm) spectra.

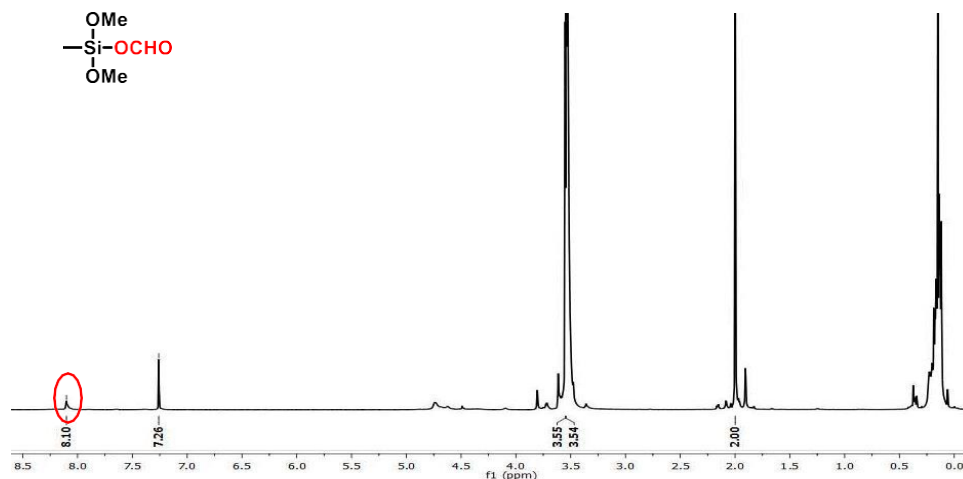

**Fig. S7.** <sup>1</sup>H NMR spectrum for silyl-formate (in CDCl<sub>3</sub> at room temperature)

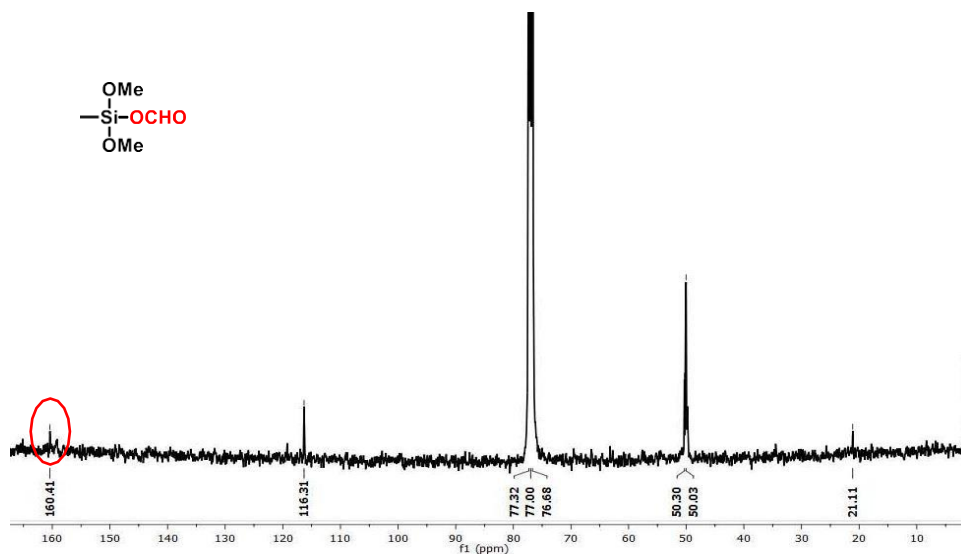

**Fig. S8.** <sup>13</sup>C NMR spectrum for silyl-formate (in CDCl<sub>3</sub> at room temperature)

1) H<sub>2</sub> evolution experiment:

In a nitrogen filled glovebox, 2 (0.015 mmol) and potassium (0.03 mmol) were taken in a vial in CD<sub>3</sub>CN (0.6 mL) and stirred for 2-3 minutes. It was then allowed to settle down (as the catalyst is sparingly soluble in acetonitrile) and the upper clear solution portion was transferred to a screw capped NMR tube. Phenylsilane (0.45 mmol) and benzamide (0.45 mmol) were added to it and immediately the tube was closed tightly. <sup>1</sup>H NMR spectrum of the reaction mixture was recorded. Gas bubbling was observed in the reaction medium. A peak at 4.57 ppm<sup>4</sup> indicates formation of H<sub>2</sub> in the reaction.

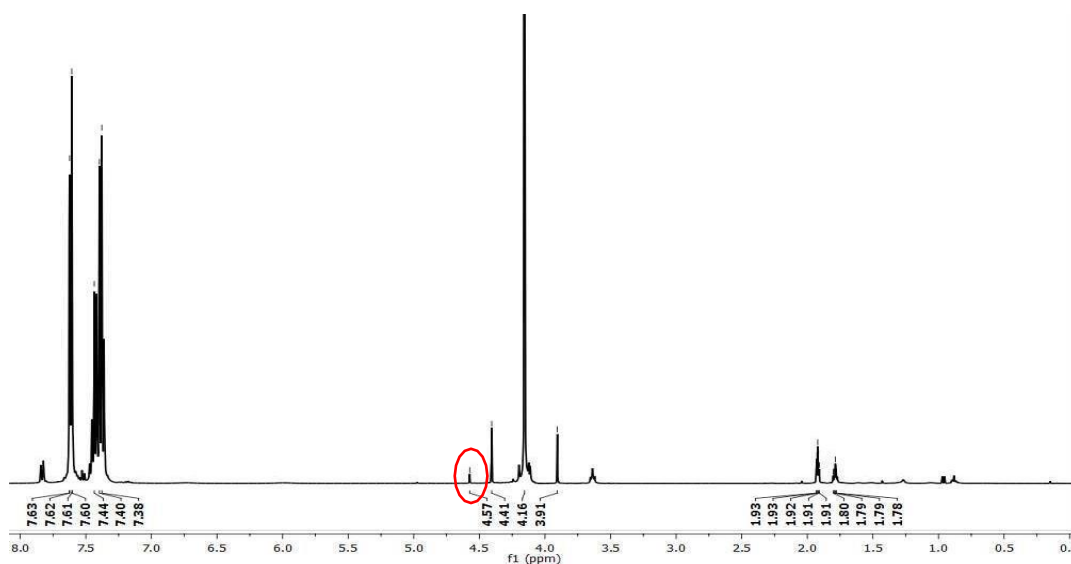

**Fig. S9.** <sup>1</sup>H NMR spectrum for H<sub>2</sub> evolution (in CD<sub>3</sub>CN at room temperature)

### III. Characterization of N-formylamide compounds

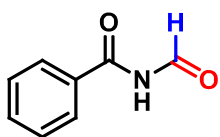

N-formylbenzamide (**4a**)<sup>5</sup>: White crystalline solid. Yield 80%. The crude product was purified by column chromatography using silica gel (100-200 mesh) with 10% of EtOAc in hexane.

<sup>1</sup>H-NMR (400 MHz, CDCl<sub>3</sub>, 298 K)  $\delta$  (ppm) 10.02 (br s, 1H), 9.39 (d,  $J = 8\text{Hz}$ , 1H), 7.99 (d,  $J = 8\text{Hz}$ , 2H), 7.65 (t, 1H,  $J_1 = 2.5\text{Hz}$ ,  $J_2 = 1.25\text{Hz}$ ), 7.52-7.55 (m, 2H).

<sup>13</sup>C NMR (100 MHz, CDCl<sub>3</sub>, 298 K)  $\delta$  (ppm) 166.6, 164.6, 133.9, 131.0, 129.0, 128.0.

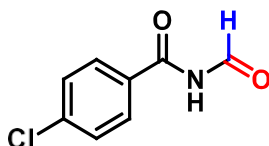

4-chloro-N-formylbenzamide (**4b**)<sup>5</sup>: White crystalline solid. Yield 55%. The crude product was purified by column chromatography using silica gel (100-200 mesh) with 10% of EtOAc in hexane.

<sup>1</sup>H-NMR (400 MHz, DMSO-d<sub>6</sub>, 298 K)  $\delta$  (ppm) 11.80 (br s, 1H), 9.25 (m, 1H), 8.03 (d,  $J = 8\text{Hz}$ , 2H), 7.62 (d,  $J = 8\text{Hz}$ , 2H).

<sup>13</sup>C NMR (100 MHz, DMSO-d<sub>6</sub>, 298 K)  $\delta$  (ppm) 167.1, 164.8, 138.9, 130.8, 130.8, 129.

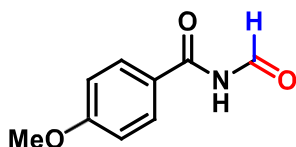

N-formyl-4-methoxybenzamide (**4c**)<sup>6</sup>: White crystalline solid. Yield 75%. The crude product was purified by column chromatography using silica gel (100-200 mesh) with 15% EtOAc in hexane.

$^1\text{H-NMR}$  (400 MHz,  $\text{CDCl}_3 + \text{DMSO-d}_6$ , 298 K)  $\delta$  (ppm) 10.95 (br s, 1H), 8.92 (d,  $J = 8\text{Hz}$ , 1H), 7.63 (d,  $J = 8\text{Hz}$ , 2H), 6.55 (d,  $J = 8\text{Hz}$ , 2H), 3.45 (s, 3H).

$^{13}\text{C NMR}$  (100 MHz,  $\text{CDCl}_3 + \text{DMSO-d}_6$ , 298 K)  $\delta$  (ppm) 166.0, 163.6, 162.7, 129.8, 122.8, 112.9, 54.5.

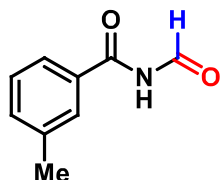

N-formyl-3-methylbenzamide (**4d**)<sup>7</sup>: White crystalline solid. Yield 60%. The crude product was purified by column chromatography using silica gel (100-200 mesh) with 10% of EtOAc in hexane.

$^1\text{H-NMR}$  (400 MHz,  $\text{CDCl}_3$ , 298 K)  $\delta$  (ppm) 9.97 (br s, 1H), 9.38 (d,  $J = 8\text{Hz}$ , 1H), 7.80 (s, 1H), 7.76 (d,  $J = 8\text{Hz}$ , 1H), 7.35-7.46 (m, 2H), 2.43 (s, 3H).

$^{13}\text{C NMR}$  (100 MHz,  $\text{CDCl}_3$ , 298 K)  $\delta$  (ppm) 166.7, 164.5, 139.0, 134.7, 131.0, 128.9, 128.7, 125.0, 21.2.

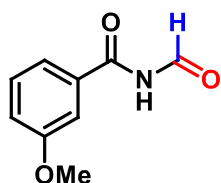

N-formyl-3-methoxybenzamide (**4e**)<sup>7</sup>: White crystalline solid. Yield 66%. The crude product was purified by column chromatography using silica gel (100-200 mesh) with 15% of EtOAc in hexane.

$^1\text{H-NMR}$  (400 MHz,  $\text{DMSO-d}_6$ , 298 K)  $\delta$  (ppm) 10.87 (br s, 1H), 8.40 (s, 1H), 6.74-6.76 (m, 1H), 6.70-6.71 (m, 1H), 6.57-6.61 (m, 1H), 6.35-6.38 (m, 1H), 2.96 (s, 3H).

$^{13}\text{C}$  NMR (100 MHz, DMSO- $d_6$ , 298 K)  $\delta$  (ppm) 167.3, 164.5, 159.3, 132.8, 129.9, 120.7, 119.7, 113.0, 55.4.

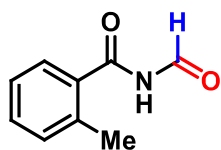

N-formyl-2-methylbenzamide (**4f**)<sup>7</sup>: White crystalline solid. Yield 40%. The crude product was purified by column chromatography using silica gel (100-200 mesh) with 10% of EtOAc in hexane.

$^1\text{H}$ -NMR (400 MHz,  $\text{CDCl}_3$ , 298 K)  $\delta$  (ppm) 9.23 (d,  $J = 12\text{Hz}$ , 1H), 9.07 (br s, 1H), 7.47-7.51 (m, 1H), 7.43-7.47 (m, 1H), 7.28-7.32 (m, 2H), 2.53 (s, 3H).

$^{13}\text{C}$  NMR (100 MHz,  $\text{CDCl}_3$ , 298 K)  $\delta$  (ppm) 168.6, 163.4, 138.4, 132.2, 132.0, 131.9, 127.3, 126.2, 20.2.

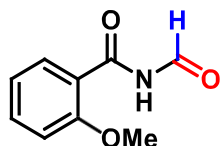

N-formyl-2-methoxybenzamide (**4g**)<sup>8</sup>: White crystalline solid. Yield 70%. The crude product was purified by column chromatography using silica gel (100-200 mesh) with 15% of EtOAc in hexane.

$^1\text{H}$ -NMR (400 MHz,  $\text{CDCl}_3$ , 298 K)  $\delta$  (ppm) 10.18 (br s, 1H), 9.41 (d,  $J = 8\text{Hz}$ , 1H), 8.20-8.22 (m, 1H), 7.57-7.58 (m, 1H), 7.12-7.15 (m, 1H), 7.03-7.05 (m, 1H), 4.02 (s, 3H).

$^{13}\text{C}$  NMR (100 MHz,  $\text{CDCl}_3$ , 298 K)  $\delta$  (ppm) 165.2, 163.2, 158.4, 135.5, 132.7, 121.7, 118.8, 111.7, 56.1.

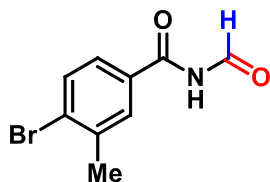

4-bromo-N-formyl-3-methylbenzamide (**4h**)<sup>7</sup>: White crystalline solid. Yield 35%. The crude product was purified by column chromatography using silica gel (100-200 mesh) with 15% of EtOAc in hexane.

<sup>1</sup>H-NMR (400 MHz, CDCl<sub>3</sub> + DMSO-d<sub>6</sub>, 298 K)  $\delta$  (ppm) 11.11 (br s, 1H), 9.25 (d,  $J = 8$ Hz, 1H), 7.84 (s, 1H), 7.61 (m, 1H), 7.51-7.53 (m, 1H), 2.44 (s, 3H).

<sup>13</sup>C NMR (100 MHz, CDCl<sub>3</sub> + DMSO-d<sub>6</sub>, 298 K)  $\delta$  (ppm) 166.8, 164.1, 138.3, 132.4, 130.6, 130.5, 130.4, 126.9, 22.5.

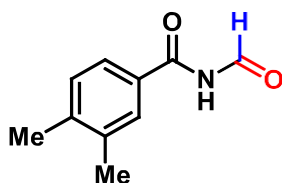

N-formyl-3,4-dimethylbenzamide (**4i**)<sup>7</sup>: White solid. Yield 60%. The crude product was purified by column chromatography using silica gel (100-200 mesh) with 15% of EtOAc in hexane.

<sup>1</sup>H-NMR (400 MHz, CDCl<sub>3</sub>, 298 K)  $\delta$  (ppm) 9.82 (br s, 1H), 9.37 (d,  $J = 8$ Hz, 1H), 7.75 (s, 1H), 7.68 (d,  $J = 8$ Hz, 1H), 7.26-7.28 (m, 1H), 2.34 (s, 6H).

<sup>13</sup>C NMR (100 MHz, CDCl<sub>3</sub>, 298 K)  $\delta$  (ppm) 166.6, 164.5, 143.7, 137.6, 130.2, 129.2, 128.5, 125.4, 19.7, 20.0.

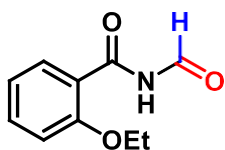

2-ethoxy-N-formylbenzamide (**4j**): Pale white solid. Yield 58%. The crude product was purified by column chromatography using silica gel (100-200 mesh) with 15% of EtOAc in hexane.

$^1\text{H-NMR}$  (400 MHz,  $\text{CDCl}_3$ , 298 K)  $\delta$  (ppm) 10.35 (br s, 1H), 9.38 (d,  $J = 12\text{Hz}$ , 1H), 8.18-8.20 (dd,  $J_1 = 8\text{Hz}$ ,  $J_2 = 4\text{Hz}$ , 1H), 7.52-7.57 (m, 1H), 7.08-7.13 (t,  $J_1 = 8\text{Hz}$ ,  $J_2 = 8\text{Hz}$ , 1H), 7.0 (d,  $J = 8\text{Hz}$ , 1H), 4.23-4.28 (q, 3H), 1.54-1.58 (t,  $J_1 = 8\text{Hz}$ ,  $J_2 = 8\text{Hz}$ , 4H).

$^{13}\text{C NMR}$  (100 MHz,  $\text{CDCl}_3$ , 298 K)  $\delta$  (ppm) 165.2, 163.0, 157.9, 135.3, 132.6, 121.6, 118.8, 112.7, 65.3, 14.5.

HRMS calculated for  $\text{C}_{10}\text{H}_{11}\text{NO}_3\text{Na}$  [ $\text{M} + \text{Na}$ ] $^+$  216.0637, found 216.0631.

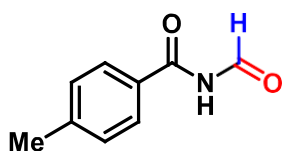

N-formyl-4-methylbenzamide (**4k**)<sup>5</sup>: White solid. Yield 72%. The crude product was purified by column chromatography using silica gel (100-200 mesh) with 10% of EtOAc in hexane.

$^1\text{H-NMR}$  (400 MHz,  $\text{CDCl}_3$ , 298 K)  $\delta$  (ppm) 10.11 (br s, 1H), 9.38 (d,  $J = 8\text{Hz}$ , 1H), 7.89 (d,  $J = 8\text{Hz}$ , 2H), 7.32 (d,  $J = 8\text{Hz}$ , 2H), 2.43 (s, 3H).

$^{13}\text{C NMR}$  (100 MHz,  $\text{CDCl}_3$ , 298 K)  $\delta$  (ppm) 166.5, 164.8, 144.9, 129.7, 128.1, 127.9, 21.6.

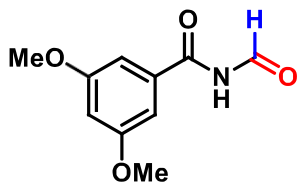

N-formyl-3,5-dimethoxybenzamide (**4l**): Off-white solid. Yield 71%. The crude product was purified by column chromatography using silica gel (100-200 mesh) with 15% of EtOAc in hexane.

$^1\text{H-NMR}$  (400 MHz,  $\text{DMSO-d}_6$ , 298 K)  $\delta$  (ppm) 11.0 (br s, 1H), 8.77 (d,  $J = 8\text{Hz}$ , 1H), 6.67 (s, 2H), 6.1 (s, 1H), 3.27 (s, 6H).

$^{13}\text{C NMR}$  (100 MHz,  $\text{DMSO-d}_6$ , 298 K)  $\delta$  (ppm) 167.5, 165.0, 161.0, 133.9, 106.5, 106.2, 55.1.

HRMS calculated for  $\text{C}_{10}\text{H}_{11}\text{NO}_4\text{Na}$   $[\text{M} + \text{Na}]^+$  232.0586, found 232.0590.

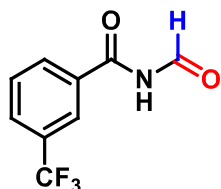

N-formyl-3-(trifluoromethyl)benzamide (**4m**)<sup>7</sup>: Off-white solid. Yield 30%. The crude product was purified by column chromatography using silica gel (100-200 mesh) with 15% of EtOAc in hexane.

$^1\text{H-NMR}$  (400 MHz,  $\text{CDCl}_3$ , 298 K)  $\delta$  (ppm) 10.3 (br s, 1H), 9.41 (d,  $J = 9\text{Hz}$ , 1H), 8.31 (s, 1H), 8.19-8.20 (m, 1H), 7.90-7.92 (m, 1H), 7.68-7.72 (m, 1H).

$^{13}\text{C NMR}$  (125 MHz,  $\text{CDCl}_3$ , 298 K)  $\delta$  (ppm) 165.4, 164.6, 131.9, 131.9 (q,  $^2J_{\text{C-F}} = 33.8\text{ Hz}$ ), 131.1, 130.4 (q,  $^3J_{\text{C-F}} = 3.8\text{ Hz}$ ), 129.8, 125.3 (q,  $^3J_{\text{C-F}} = 3.7\text{ Hz}$ ), 123.4 (q,  $^1J_{\text{C-F}} = 270\text{ Hz}$ ).

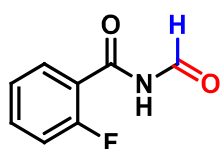

N-formyl-2-fluorobenzamide (**4n**)<sup>7</sup>: Off-white solid. Yield 30%. The crude product was purified by column chromatography using silica gel (100-200 mesh) with 15% of EtOAc in hexane.

$^1\text{H-NMR}$  (400 MHz,  $\text{CDCl}_3$ , 298 K)  $\delta$  (ppm) 9.39 (d,  $J = 12\text{Hz}$ , 1H), 9.07 (br s, 1H), 8.13 (d,  $J = 4\text{Hz}$ , 1H), 7.62-7.64 (m, 1H), 7.35-7.37 (m, 1H), 7.18-7.24 (m, 1H).



$^{13}\text{C}$  NMR (125 MHz,  $\text{CDCl}_3$ , 298 K)  $\delta$  (ppm) 163.06 (d,  $^3J_{\text{C-F}} = 2.5\text{Hz}$ ), 162.42, 161.2 (d,  $^1J_{\text{C-F}} = 248\text{Hz}$ ), 135.9 (d,  $^3J_{\text{C-F}} = 8.8\text{Hz}$ ), 132.31, 125.4 ( $^3J_{\text{C-F}} = 3.8\text{Hz}$ ), 118.6 (d,  $^2J_{\text{C-F}} = 10\text{Hz}$ ), 116.6 (d,  $^2J_{\text{C-F}} = 23.75\text{Hz}$ ).

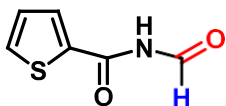

N-formylthiophene-2-carboxamide (**4o**)<sup>8</sup>: Off-white solid. Yield 40%. The crude product was purified by column chromatography using silica gel (100-200 mesh) with 10% of EtOAc in hexane.

$^1\text{H}$ -NMR (400 MHz,  $\text{CDCl}_3$ , 298 K)  $\delta$  (ppm) 10.14 (br s, 1H), 9.35, (d,  $J = 8\text{Hz}$ , 1H), 7.93-7.94 (m, 1H), 7.73-7.75 (m, 1H), 7.19-7.22 (m, 1H).

$^{13}\text{C}$  NMR (100 MHz,  $\text{CDCl}_3$ , 298 K)  $\delta$  (ppm) 164.3, 160.9, 136.0, 134.6, 131.7, 128.6.

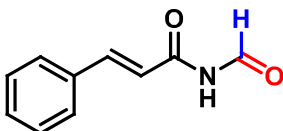

N-formylcinnamamide (**4p**)<sup>8</sup>: White solid. Yield 40%. The crude product was purified by column chromatography using silica gel (100-200 mesh) with 10% of EtOAc in hexane.

$^1\text{H}$ -NMR (400 MHz,  $\text{CDCl}_3$ , 298 K)  $\delta$  (ppm) 9.70 (br s, 1H), 9.28 (d,  $J = 8\text{Hz}$ , 1H), 7.89 (d,  $J = 16\text{Hz}$ , 1H), 7.56-7.58 (m, 2H), 7.39-7.44 (m, 3H), 6.54 (d,  $J = 16\text{Hz}$ , 1H)

$^{13}\text{C}$  NMR (100 MHz,  $\text{CDCl}_3$ , 298 K)  $\delta$  (ppm) 165.4, 164.4, 146.6, 133.6, 131.2, 129.0, 128.6, 117.9.

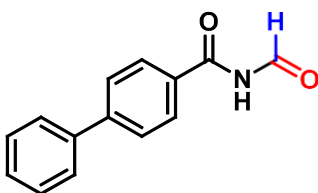

N-formyl-[1,1'-biphenyl]-4-carboxamide (**4q**): Off-white solid. Yield 35%. The crude product was purified by column chromatography using silica gel (100-200 mesh) with 20% of EtOAc in hexane.

$^1\text{H-NMR}$  (400 MHz,  $\text{CDCl}_3$ , 298 K)  $\delta$  (ppm) 9.41 (d,  $J = 8\text{Hz}$ , 1H), 8.01 (d,  $J = 8\text{Hz}$ , 2H), 7.76 (d,  $J = 12\text{Hz}$ , 2H), 7.63-7.65 (m, 2H), 7.48-7.51 (m, 2H), 7.41-7.45 (m, 1H).

$^{13}\text{C NMR}$  (100 MHz,  $\text{CDCl}_3$ , 298 K)  $\delta$  (ppm) 166.0, 163.6, 146.8, 139.3, 129.6, 129.0, 128.6, 128.5, 127.7, 127.3.

HRMS calculated for  $\text{C}_{14}\text{H}_{11}\text{NO}_2\text{Na}$  [ $\text{M} + \text{Na}$ ] $^+$  248.0687, found 248.0683.

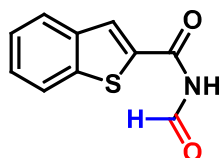

N-formylbenzo[b]thiophene-2-carboxamide (**4r**): Off-white solid. Yield 70%. The crude product was purified by column chromatography using silica gel (100-200 mesh) with 20% of EtOAc in hexane.

$^1\text{H-NMR}$  (400 MHz,  $\text{CDCl}_3 + \text{DMSO-d}_6$ , 298 K)  $\delta$  (ppm) 11.45 (br s, 1H), 8.91-8.95 (m, 1H), 8.04 (d,  $J = 8\text{Hz}$ , 1H), 7.48-7.52 (m, 2H), 7.02-7.08 (m, 2H).

$^{13}\text{C NMR}$  (100 MHz,  $\text{CDCl}_3 + \text{DMSO-d}_6$ , 298 K)  $\delta$  (ppm) 162.9, 162.2, 141.2, 138.2, 135.8, 128.7, 126.4, 125.2, 124.1, 121.7.

HRMS calculated for  $\text{C}_{10}\text{H}_7\text{NO}_2\text{SNa}$  [ $\text{M} + \text{Na}$ ] $^+$  228.0095, found 228.0094.

#### IV. Spectroscopic characterization data of Cr-complex.

a) EPR spectroscopy for characterization of different Cr-PLY redox species.

All EPR spectra were recorded in solid state at 100K, packed under N<sub>2</sub> atmosphere.

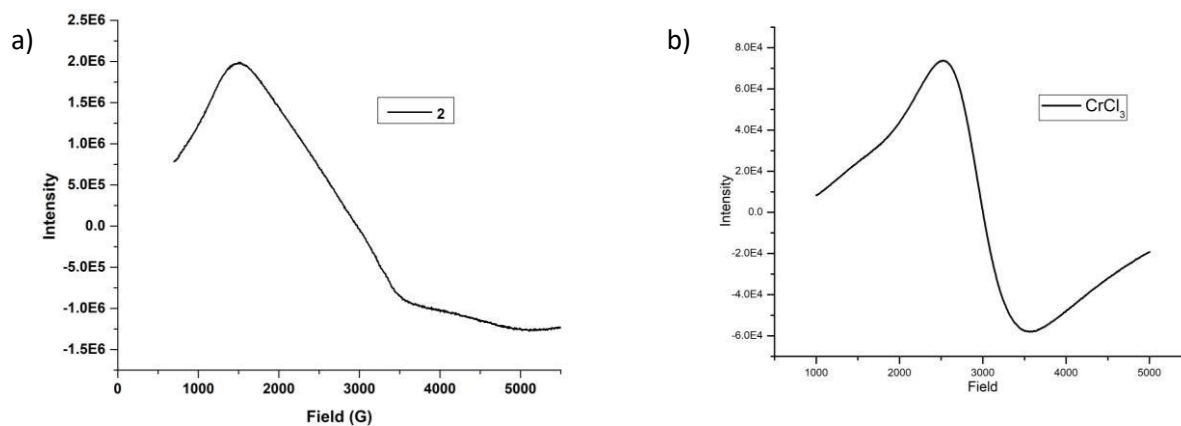

**Fig. S10.** EPR spectra of (a) Cr(III) complex **2** and (b) standard Cr(III) complex (CrCl<sub>3</sub>).

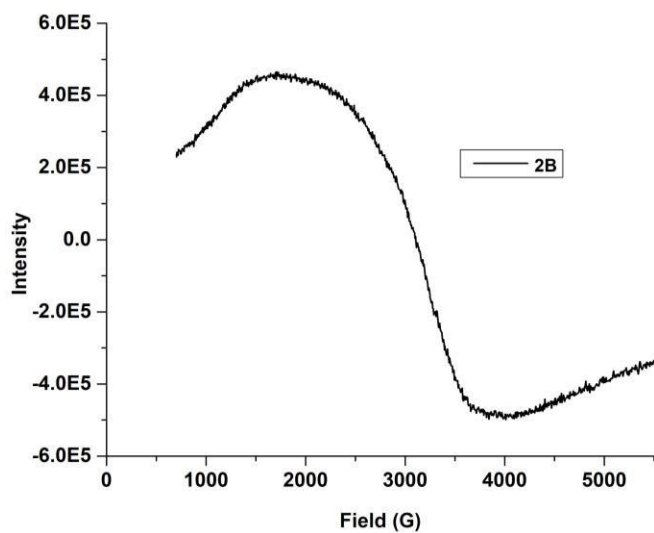

**Fig. S11.** EPR spectrum of doubly reduced anionic Cr-PLY complex (**2B**).

b) UV-Vis spectroscopy for 1, 2 and 2A.

All UV-vis spectra were recorded in dry acetonitrile solution at room temperature.

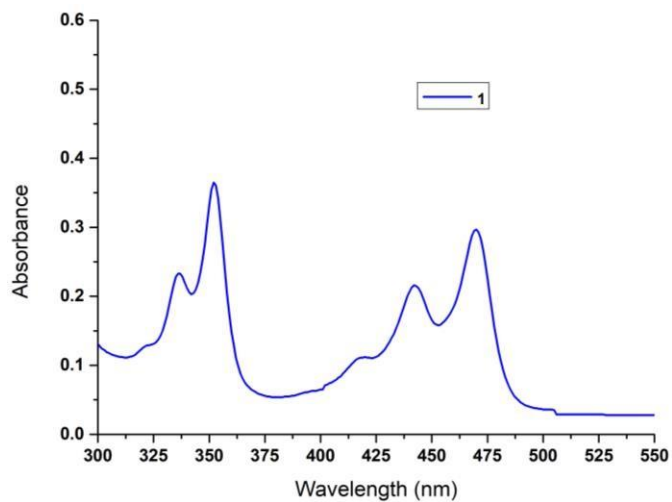

**Fig. S12.** UV-Vis spectrum of ligand 1.

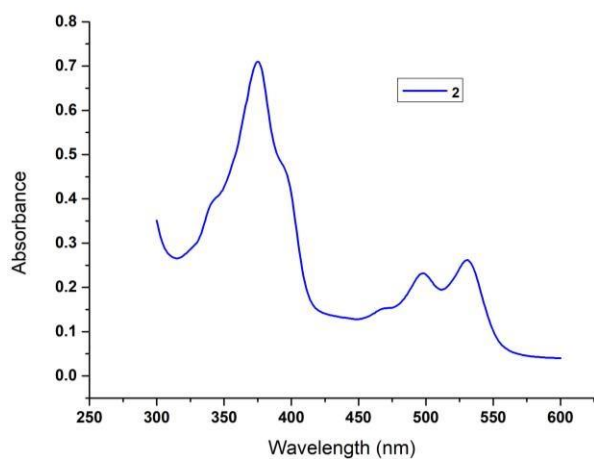

**Fig. S13.** UV-Vis spectrum of Cr(III)-complex 2.

## V. X-ray crystallographic details.

Suitable single crystals of **1**, **2** and **2A** were selected and mounted under nitrogen atmosphere using the X-TEMP2 and intensity data were collected on a Super Nova, Dual, Cu at zero, Eos diffractometer. All the crystals were kept at 100 K during data collection. Using Olex2,<sup>9</sup> the structure was solved with the ShelXT<sup>10</sup> structure solution program using Intrinsic Phasing and refined with the ShelXL<sup>11</sup> refinement package using Least Squares minimisation. All

nonhydrogen atoms were refined with anisotropic displacement parameters. Crystallographic data (including structure factors) for the structures have been deposited with the Cambridge Crystallographic Data Centre. Copies of the data can be obtained free of charge from The Cambridge Crystallographic Data Centre *via* 2011059, 2015086 and 2011060 contain the supplementary crystallographic data of compounds **1**, **2** and **2A** respectively for this paper.

#### Crystallographic and data collection parameters for **2**, **3** and **4**.

|                                    | <b>1</b>                                         | <b>2</b>                                                                                       | <b>2A</b>                                                       |
|------------------------------------|--------------------------------------------------|------------------------------------------------------------------------------------------------|-----------------------------------------------------------------|
| CCDC                               | 2011059                                          | 2015086                                                                                        | 2011060                                                         |
| Identification code                | Lig_NNO                                          | Cr_NNO                                                                                         | soumi_191019                                                    |
| Empirical formula                  | C <sub>19</sub> H <sub>14</sub> N <sub>2</sub> O | C <sub>80</sub> H <sub>72</sub> Cl <sub>2</sub> Cr <sub>2</sub> N <sub>8</sub> O <sub>10</sub> | C <sub>38</sub> H <sub>26</sub> CrN <sub>4</sub> O <sub>2</sub> |
| Formula weight                     | 286.32                                           | 1480.35                                                                                        | 622.63                                                          |
| Temperature/K                      | 100.00(10)                                       | 100.0(2)                                                                                       | 100.00(10)                                                      |
| Crystal system                     | Triclinic                                        | triclinic                                                                                      | orthorhombic                                                    |
| Space group                        | P-1                                              | P-1                                                                                            | Pbca                                                            |
| a/Å                                | 6.1633(9)                                        | 9.8879(7)                                                                                      | 8.78070(10)                                                     |
| b/Å                                | 10.2878(14)                                      | 16.9397(10)                                                                                    | 25.3182(3)                                                      |
| c/Å                                | 11.0233(16)                                      | 20.5976(14)                                                                                    | 29.7149(3)                                                      |
| α/°                                | 88.901(11)                                       | 83.383(5)                                                                                      | 90                                                              |
| β/°                                | 81.769(12)                                       | 76.246(6)                                                                                      | 90                                                              |
| γ/°                                | 81.501(12)                                       | 89.429(5)                                                                                      | 90                                                              |
| Volume/Å <sup>3</sup>              | 684.16(17)                                       | 3328.3(4)                                                                                      | 6605.96(13)                                                     |
| Z                                  | 2                                                | 2                                                                                              | 8                                                               |
| ρ <sub>calc</sub> /cm <sup>3</sup> | 1.390                                            | 1.477                                                                                          | 1.252                                                           |

|                                                   |                                                                    |                                                                         |                                                                         |
|---------------------------------------------------|--------------------------------------------------------------------|-------------------------------------------------------------------------|-------------------------------------------------------------------------|
| $\mu/\text{mm}^{-1}$                              | 0.087                                                              | 0.478                                                                   | 3.153                                                                   |
| F(000)                                            | 300.0                                                              | 1540.0                                                                  | 2576.0                                                                  |
| Crystal size/ $\text{mm}^3$                       | $0.3 \times 0.2 \times 0.15$                                       | $0.25 \times 0.15 \times 0.1$                                           | $0.2 \times 0.1 \times 0.1$                                             |
| Radiation                                         | MoK $\alpha$ ( $\lambda =$<br>0.71073)                             | MoK $\alpha$ ( $\lambda =$<br>0.71073)                                  | CuK $\alpha$ ( $\lambda =$<br>1.54184)                                  |
| 2 $\Theta$ range for data<br>collection/ $^\circ$ | 3.734 to 52.638                                                    | 3.348 to 50.044                                                         | 5.948 to 132.418                                                        |
| Index ranges                                      | $-6 \leq h \leq 7, -12 \leq k \leq$<br>11, $-13 \leq l \leq 13$    | $-4 \leq h \leq 11, -20 \leq$<br>$k \leq 20, -24 \leq l \leq 24$        | $-10 \leq h \leq 9, -30 \leq$<br>$k \leq 29, -26 \leq l \leq$<br>35     |
| Reflections collected                             | 3749                                                               | 10387                                                                   | 37306                                                                   |
| Independent reflections                           | 2679 [ $R_{\text{int}} = 0.0293,$<br>$R_{\text{sigma}} = 0.0526$ ] | 8861 [ $R_{\text{int}} =$<br>$0.0665, R_{\text{sigma}} =$<br>$0.0743$ ] | 5789 [ $R_{\text{int}} =$<br>$0.0489, R_{\text{sigma}} =$<br>$0.0240$ ] |
| Data/restraints/parameters                        | 2679/0/199                                                         | 8861/0/911                                                              | 5789/0/406                                                              |
| Goodness-of-fit on $F^2$                          | 1.033                                                              | 1.168                                                                   | 1.045                                                                   |
| Final R indexes [ $I \geq 2\sigma$<br>(I)]        | $R_1 = 0.0742, wR_2 =$<br>0.1928                                   | $R_1 = 0.1025,$<br>$wR_2 = 0.2616$                                      | $R_1 = 0.0403,$<br>$wR_2 = 0.1172$                                      |
| Final R indexes [all data]                        | $R_1 = 0.0925, wR_2 =$<br>0.2178                                   | $R_1 = 0.1123,$<br>$wR_2 = 0.2673$                                      | $R_1 = 0.0455,$<br>$wR_2 = 0.1229$                                      |
| Largest diff. peak/hole / e<br>$\text{\AA}^{-3}$  | 0.40/-0.46                                                         | 0.84/-0.77                                                              | 0.20/-0.38                                                              |

## VI. Computational details.

Geometry optimization and frequency calculations have been carried out in Gaussian 16<sup>12</sup> with B3LYP<sup>13</sup> method 6-31+g(d) for C, H, N, O and lanl2dz<sup>14</sup> for Cr metal.

**Table S3. Energy value (in H) for different spin states of 2, 2A and 2B.**

| Cr-PLY species | Spin state            | Energy (H)    |
|----------------|-----------------------|---------------|
| <b>2</b>       | Doublet ( $S = 1/2$ ) | 1918.961813   |
|                | Quartet ( $S = 3/2$ ) | 1918.997801 H |
| <b>2A</b>      | Singlet ( $S = 0$ )   | 1919.083804 H |
|                | Triplet ( $S = 1$ )   | 1919.144978 H |
|                | Quintet ( $S = 2$ )   | 1919.129894 H |
| <b>2B</b>      | Doublet ( $S = 1/2$ ) | 1919.186523 H |
|                | Quartet ( $S = 3/2$ ) | 1919.182342 H |
|                | Sextet ( $S = 5/2$ )  | 1919.175738 H |

### Spin Density Plots for 2, 2A and 2B:

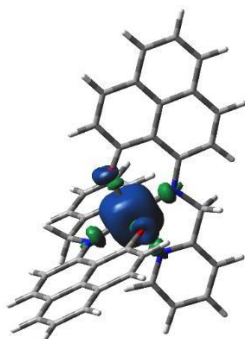

Cationic Cr-PLY **2**

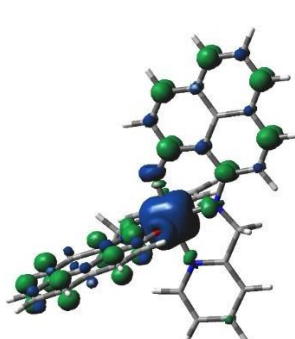

Neutral Cr-PLY **2A**

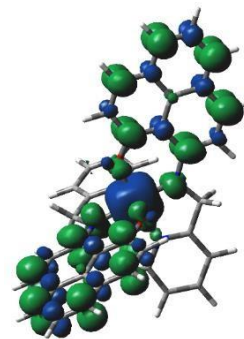

Anionic Cr-PLY **2B**

## Optimized geometry for 2, 2A and 2B.

### CrPLY1gen2m062x

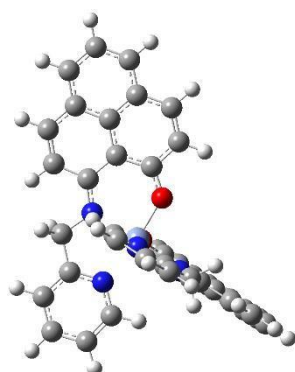

|    |             |             |             |
|----|-------------|-------------|-------------|
| Cr | -0.00003600 | 0.53383600  | 0.00002700  |
| C  | -2.74277600 | -0.03467100 | 1.14660100  |
| N  | 0.70864900  | 2.04664200  | 1.30029100  |
| C  | 3.03919100  | -0.93932600 | -0.05245900 |
| C  | 6.51435000  | -2.06092600 | -0.97782600 |
| C  | 5.27652700  | -1.41111600 | -1.02942900 |
| C  | 2.10562300  | -1.21930200 | 0.99093600  |
| C  | 0.20178800  | 3.23478600  | 3.29921300  |
| C  | -3.75061400 | 0.09580700  | 2.18065300  |
| C  | 4.64290200  | -2.49249100 | 1.04952500  |
| C  | 1.88408800  | 2.68812100  | 1.21903500  |
| C  | -5.27645100 | -1.41138900 | 1.02940900  |
| C  | 4.30894300  | -1.60615500 | -0.00974300 |



|   |             |             |             |
|---|-------------|-------------|-------------|
| C | 2.27604600  | 3.62724100  | 2.15757300  |
| C | 3.68003000  | -2.73112200 | 2.07800000  |
| C | 6.83093800  | -2.91539700 | 0.07189800  |
| C | -4.30904800 | -1.60600100 | 0.00947600  |
| C | -0.12312700 | 2.29972500  | 2.31658700  |
| C | 5.89377300  | -3.12596700 | 1.07383200  |
| C | 2.46758100  | -2.12752900 | 2.04603000  |
| C | 1.41346700  | 3.90496900  | 3.21778100  |
| C | -4.94126100 | -0.54831000 | 2.11598100  |
| O | 0.92313600  | -0.71894700 | 1.08025500  |
| N | 1.61287800  | 0.66945700  | -1.21552300 |
| C | 2.74278200  | -0.03449900 | -1.14659000 |
| N | -0.70848900 | 2.04700000  | -1.29995700 |
| C | 4.94146300  | -0.54769000 | -2.11577500 |
| C | 3.75077800  | 0.09634500  | -2.18045400 |
| C | 0.12330500  | 2.30023400  | -2.31619300 |
| C | 1.41880100  | 1.52904700  | -2.37717800 |
| C | -1.88381800 | 2.68866400  | -1.21847300 |
| C | -2.27562600 | 3.62813400  | -2.15671900 |

|   |             |             |             |
|---|-------------|-------------|-------------|
| C | -0.20148000 | 3.23562500  | -3.29855100 |
| C | -1.41303100 | 3.90600500  | -3.21688000 |
| C | -2.10586400 | -1.21878900 | -0.99138200 |
| C | -4.64319200 | -2.49190600 | -1.05009900 |
| C | -3.03929600 | -0.93917200 | 0.05224600  |
| C | -6.51426200 | -2.06124200 | 0.97779100  |
| C | -3.68053600 | -2.73002400 | -2.07890300 |
| C | -6.83101200 | -2.91530700 | -0.07220200 |
| C | -2.46808900 | -2.12644200 | -2.04689200 |
| C | -5.89403300 | -3.12541900 | -1.07441800 |
| O | -0.92333700 | -0.71854900 | -1.08062400 |
| N | -1.61291400 | 0.66939500  | 1.21552900  |
| C | -1.41872500 | 1.52869600  | 2.37737900  |
| H | 1.41198700  | 0.93899500  | -3.30602100 |
| H | 2.23598900  | 2.25900100  | -2.47719400 |
| H | 1.71521000  | -2.30058200 | 2.80713800  |
| H | 3.93544200  | -3.41280000 | 2.88490900  |
| H | 7.22903600  | -1.88899200 | -1.77816500 |
| H | 7.79272900  | -3.41424800 | 0.10448700  |

|   |             |             |             |
|---|-------------|-------------|-------------|
| H | 6.11951900  | -3.79639600 | 1.89874500  |
| H | 3.55679100  | 0.72578600  | -3.03720900 |
| H | 5.66829400  | -0.41256400 | -2.91295300 |
| H | 0.49115200  | 3.42440900  | -4.11239300 |
| H | -1.68622900 | 4.63611400  | -3.97161400 |
| H | -3.23296100 | 4.12622900  | -2.06125600 |
| H | -2.50983300 | 2.41711600  | -0.37426000 |
| H | 2.51007700  | 2.41674100  | 0.37474700  |
| H | 3.23348100  | 4.12517600  | 2.06228200  |
| H | 1.68676900  | 4.63481000  | 3.97273700  |
| H | -0.49083800 | 3.42346600  | 4.11308500  |
| H | -5.66797300 | -0.41347400 | 2.91331600  |
| H | -3.55656700 | 0.72505000  | 3.03753700  |
| H | -1.71586900 | -2.29913100 | -2.80823300 |
| H | -3.93611300 | -3.41131700 | -2.88608500 |
| H | -6.11992700 | -3.79550600 | -1.89956900 |
| H | -7.79278400 | -3.41419300 | -0.10481000 |
| H | -7.22879900 | -1.88964300 | 1.77833500  |
| H | -1.41195000 | 0.93844500  | 3.30609600  |

|   |             |            |            |
|---|-------------|------------|------------|
| H | -2.23584000 | 2.25871100 | 2.47757400 |
|---|-------------|------------|------------|

**CrPLY2gen1m062x**

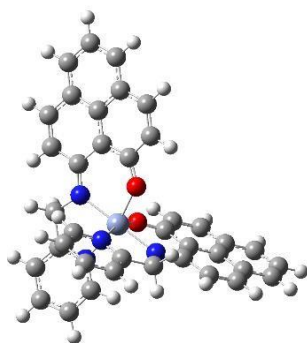

|    |             |            |            |
|----|-------------|------------|------------|
| Cr | -0.00001100 | 0.76762300 | 0.00015500 |
|----|-------------|------------|------------|

|   |             |             |            |
|---|-------------|-------------|------------|
| C | -2.79745600 | -0.06733700 | 0.98320700 |
|---|-------------|-------------|------------|

|   |            |            |            |
|---|------------|------------|------------|
| N | 0.39584600 | 2.35246400 | 1.36026400 |
|---|------------|------------|------------|

|   |            |             |            |
|---|------------|-------------|------------|
| C | 2.92901100 | -1.02263700 | 0.10975100 |
|---|------------|-------------|------------|

|   |            |             |             |
|---|------------|-------------|-------------|
| C | 6.21986900 | -2.64915400 | -0.76712700 |
|---|------------|-------------|-------------|

|   |            |             |             |
|---|------------|-------------|-------------|
| C | 5.10258000 | -1.81338000 | -0.82523000 |
|---|------------|-------------|-------------|

|   |            |             |            |
|---|------------|-------------|------------|
| C | 1.96280200 | -1.13089800 | 1.16708900 |
|---|------------|-------------|------------|

|   |             |            |            |
|---|-------------|------------|------------|
| C | -0.44311500 | 3.57865100 | 3.22081600 |
|---|-------------|------------|------------|

|   |             |             |            |
|---|-------------|-------------|------------|
| C | -3.88358600 | -0.04351200 | 1.95958000 |
|---|-------------|-------------|------------|

|   |            |             |            |
|---|------------|-------------|------------|
| C | 4.27741900 | -2.80457100 | 1.22896400 |
|---|------------|-------------|------------|

|   |            |            |            |
|---|------------|------------|------------|
| C | 1.50614200 | 3.09909100 | 1.38118700 |
|---|------------|------------|------------|

|   |             |             |            |
|---|-------------|-------------|------------|
| C | -5.10245500 | -1.81365900 | 0.82530800 |
|---|-------------|-------------|------------|

|   |            |             |            |
|---|------------|-------------|------------|
| C | 4.08672500 | -1.86943100 | 0.17023100 |
|---|------------|-------------|------------|

|   |            |            |            |
|---|------------|------------|------------|
| C | 1.70803500 | 4.11142400 | 2.30741100 |
|---|------------|------------|------------|

|   |             |             |             |
|---|-------------|-------------|-------------|
| C | 3.29496100  | -2.87692800 | 2.26778500  |
| C | 6.38082400  | -3.56254900 | 0.26866900  |
| C | -4.08633500 | -1.87002900 | -0.16986100 |
| C | -0.56364500 | 2.57116600  | 2.26163100  |
| C | 5.40936500  | -3.62855900 | 1.25747900  |
| C | 2.20963500  | -2.07438600 | 2.24179600  |
| C | 0.70580200  | 4.35617300  | 3.24437000  |
| C | -4.95072600 | -0.86650800 | 1.88760000  |
| O | 0.88612000  | -0.46071800 | 1.27096900  |
| N | 1.76842100  | 0.75455000  | -1.10233900 |
| C | 2.79748700  | -0.06720900 | -0.98316100 |
| N | -0.39635000 | 2.35166300  | -1.36074800 |
| C | 4.95061500  | -0.86649200 | -1.88774300 |
| C | 3.88345000  | -0.04353300 | -1.95972200 |
| C | 0.56297200  | 2.57021400  | -2.26233500 |
| C | 1.77827500  | 1.67456000  | -2.22747300 |
| C | -1.50687400 | 3.09795300  | -1.38189800 |
| C | -1.70917300 | 4.10977600  | -2.30858700 |
| C | 0.44203300  | 3.57721100  | -3.22198300 |

|   |             |             |             |
|---|-------------|-------------|-------------|
| C | -0.70711600 | 4.35437900  | -3.24577500 |
| C | -1.96206100 | -1.13195900 | -1.16634300 |
| C | -4.27674800 | -2.80554100 | -1.22832200 |
| C | -2.92863300 | -1.02320200 | -0.10935500 |
| C | -6.21975000 | -2.64943600 | 0.76717100  |
| C | -3.29396800 | -2.87833200 | -2.26681600 |
| C | -6.38044700 | -3.56314500 | -0.26837600 |
| C | -2.20859900 | -2.07586700 | -2.24076300 |
| C | -5.40870300 | -3.62950200 | -1.25689100 |
| O | -0.88521900 | -0.46204900 | -1.27006400 |
| N | -1.76848500 | 0.75463200  | 1.10229200  |
| C | -1.77868900 | 1.67514800  | 2.22703000  |
| H | 1.79982700  | 1.12905700  | -3.18429200 |
| H | 2.66924400  | 2.32367000  | -2.22757500 |
| H | 1.44809300  | -2.10678800 | 3.01383900  |
| H | 3.44331600  | -3.58897900 | 3.07619700  |
| H | 6.96867200  | -2.57156600 | -1.55167300 |
| H | 7.25113200  | -4.20886000 | 0.30513900  |
| H | 5.51535500  | -4.33013400 | 2.08135400  |

|   |             |             |             |
|---|-------------|-------------|-------------|
| H | 3.82937900  | 0.64638600  | -2.79062500 |
| H | 5.72467200  | -0.81914300 | -2.65068400 |
| H | 1.24176900  | 3.73548900  | -3.93908400 |
| H | -0.82356900 | 5.13934200  | -3.98637000 |
| H | -2.62541400 | 4.68850200  | -2.29470000 |
| H | -2.24616800 | 2.85059200  | -0.62429300 |
| H | 2.24560200  | 2.85158100  | 0.62379100  |
| H | 2.62410300  | 4.69041900  | 2.29334900  |
| H | 0.82194000  | 5.14152100  | 3.98460600  |
| H | -1.24297800 | 3.73703400  | 3.93775100  |
| H | -5.72492200 | -0.81900100 | 2.65039000  |
| H | -3.82968500 | 0.64654900  | 2.79036600  |
| H | -1.44679200 | -2.10862400 | -3.01253000 |
| H | -3.44211500 | -3.59066900 | -3.07501300 |
| H | -5.51447200 | -4.33135300 | -2.08055900 |
| H | -7.25075800 | -4.20945100 | -0.30488000 |
| H | -6.96875200 | -2.57159400 | 1.55150200  |
| H | -1.80018500 | 1.13006000  | 3.18408700  |
| H | -2.66982300 | 2.32402600  | 2.22676200  |

**CrPLY3gen2m062x**

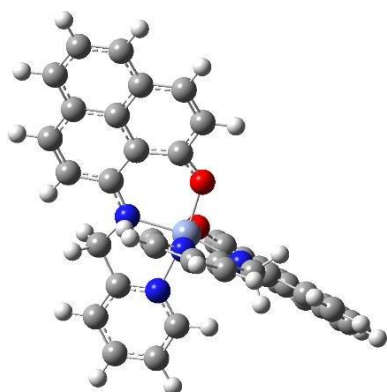

|    |             |             |             |
|----|-------------|-------------|-------------|
| Cr | -0.00009400 | -0.00042700 | 0.17393800  |
| C  | -2.71150300 | -1.36781300 | -0.08937700 |
| N  | 0.93567900  | -1.26729200 | 1.65871100  |
| C  | 3.21693200  | 0.23424100  | -0.83963200 |
| C  | 6.84119800  | 1.24083200  | -1.27456100 |
| C  | 5.47924800  | 1.29435300  | -0.90530500 |
| C  | 2.38205600  | -0.86019900 | -1.24567400 |
| C  | 0.81327900  | -3.45171200 | 2.59368000  |
| C  | -3.61220700 | -2.44107500 | 0.14343900  |
| C  | 5.15572300  | -0.91013300 | -1.92559800 |
| C  | 2.14938600  | -1.10546500 | 2.20005300  |
| C  | -5.48029400 | -1.28831900 | -0.90971300 |
| C  | 4.60287000  | 0.20383400  | -1.21700900 |
| C  | 2.75226100  | -2.09187900 | 2.96698500  |



|   |             |             |             |
|---|-------------|-------------|-------------|
| C | 4.29686300  | -1.98148800 | -2.27330800 |
| C | 7.35614600  | 0.13970500  | -1.94674400 |
| C | -4.60309000 | -0.19761200 | -1.21841900 |
| C | 0.27256800  | -2.41379100 | 1.83159200  |
| C | 6.52732000  | -0.92334400 | -2.27161400 |
| C | 2.96652000  | -1.94474000 | -1.94969100 |
| C | 2.06548100  | -3.28744800 | 3.16740600  |
| C | -4.93360700 | -2.40842700 | -0.24579200 |
| O | 1.09451400  | -0.94691100 | -1.03306400 |
| N | 1.44208700  | 1.38107700  | 0.41605000  |
| C | 2.71052700  | 1.36943400  | -0.08457600 |
| N | -0.93538600 | 1.25894700  | 1.66544700  |
| C | 4.93157900  | 2.41250200  | -0.23887300 |
| C | 3.61019200  | 2.44305600  | 0.15057400  |
| C | -0.27256100 | 2.40482000  | 1.84351900  |
| C | 1.07698900  | 2.54083500  | 1.18634200  |
| C | -2.14811400 | 1.09353900  | 2.20787000  |
| C | -2.75025400 | 2.07542800  | 2.98115700  |
| C | -0.81253600 | 3.43824200  | 2.61223600  |

|   |             |             |             |
|---|-------------|-------------|-------------|
| C | -2.06372800 | 3.27020000  | 3.18708000  |
| C | -2.38187800 | 0.86568500  | -1.24282200 |
| C | -5.15509600 | 0.91850900  | -1.92427400 |
| C | -3.21725000 | -0.22984900 | -0.84072900 |
| C | -6.84210100 | -1.23303000 | -1.27923100 |
| C | -4.29559000 | 1.99036700  | -2.26879400 |
| C | -7.35615600 | -0.12993400 | -1.94886600 |
| C | -2.96549700 | 1.95228500  | -1.94437600 |
| C | -6.52656200 | 0.93340700  | -2.27076900 |
| O | -1.09463400 | 0.95197100  | -1.02837200 |
| N | -1.44257400 | -1.38263400 | 0.40999300  |
| C | -1.07836500 | -2.54527100 | 1.17635800  |
| H | 1.05505100  | 3.46097800  | 0.57324800  |
| H | 1.80585400  | 2.74752300  | 1.99365000  |
| H | 2.29099600  | -2.74746400 | -2.22977800 |
| H | 4.71062000  | -2.83021500 | -2.81367400 |
| H | 7.47914500  | 2.08497700  | -1.02349800 |
| H | 8.40740400  | 0.11433200  | -2.22297100 |
| H | 6.91650800  | -1.78626200 | -2.80660400 |

|   |             |             |             |
|---|-------------|-------------|-------------|
| H | 3.25601100  | 3.33528100  | 0.65172500  |
| H | 5.57575300  | 3.26379400  | -0.02938100 |
| H | -0.25066100 | 4.35853900  | 2.73985700  |
| H | -2.50469800 | 4.06397700  | 3.78287400  |
| H | -3.73707300 | 1.90859100  | 3.39700100  |
| H | -2.63116100 | 0.14538300  | 1.99154600  |
| H | 2.63250600  | -0.15636200 | 1.98813600  |
| H | 3.73983800  | -1.92782400 | 3.38213000  |
| H | 2.50705500  | -4.08473000 | 3.75804900  |
| H | 0.25118600  | -4.37245200 | 2.71707700  |
| H | -5.57852100 | -3.25962800 | -0.03820300 |
| H | -3.25886100 | -3.33483900 | 0.64242000  |
| H | -2.28951500 | 2.75557400  | -2.22171500 |
| H | -4.70869500 | 2.84065100  | -2.80720400 |
| H | -6.91502600 | 1.79793400  | -2.80368200 |
| H | -8.40730600 | -0.10322500 | -2.22538000 |
| H | -7.48064500 | -2.07739600 | -1.03044200 |
| H | -1.05947000 | -3.46373100 | 0.56069100  |
| H | -1.80621400 | -2.75279900 | 1.9844      |

## VI. $^1\text{H}$ and $^{13}\text{C}$ NMR spectra.

**Fig. S14.**  $^1\text{H}$  NMR spectrum ( $\text{CDCl}_3$ ) of 9-((pyridin-2-ylmethyl)amino)-1H-phenalen-1-one

(1):

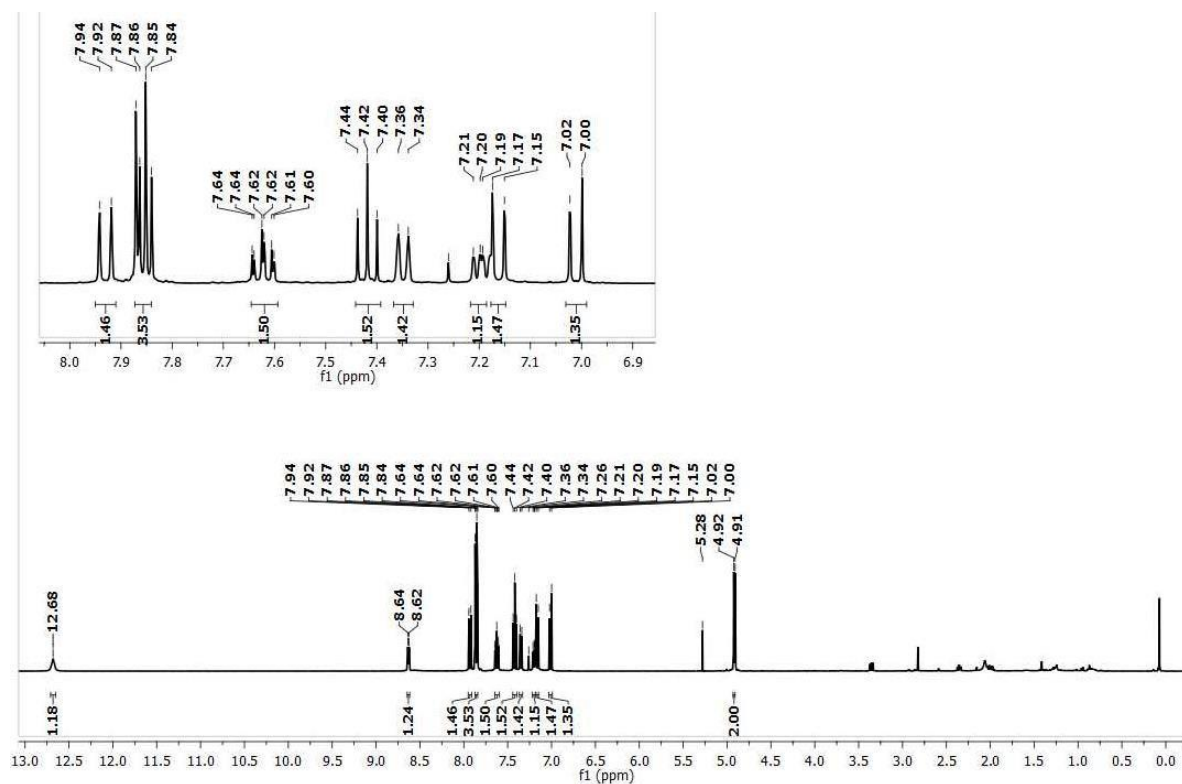

**Fig. S15.**  $^{13}\text{C}$  NMR spectrum ( $\text{CDCl}_3$ ) of 9-((pyridin-2-ylmethyl)amino)-1H-phenalen-1-one

(1):

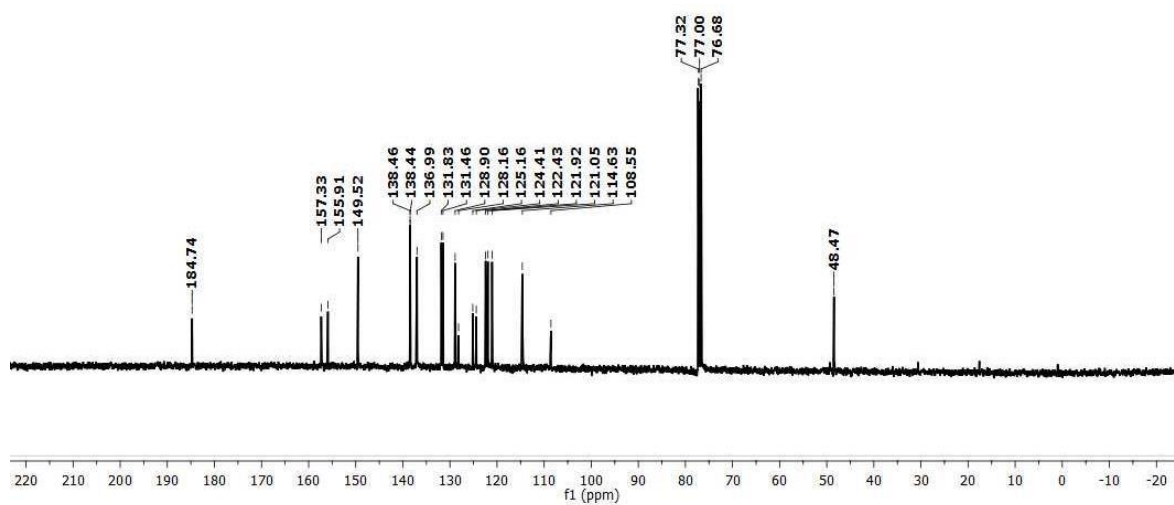

**Fig. S16.**  $^1\text{H}$  NMR spectrum ( $\text{CDCl}_3$ ) of N-formylbenzamide (**4a**):

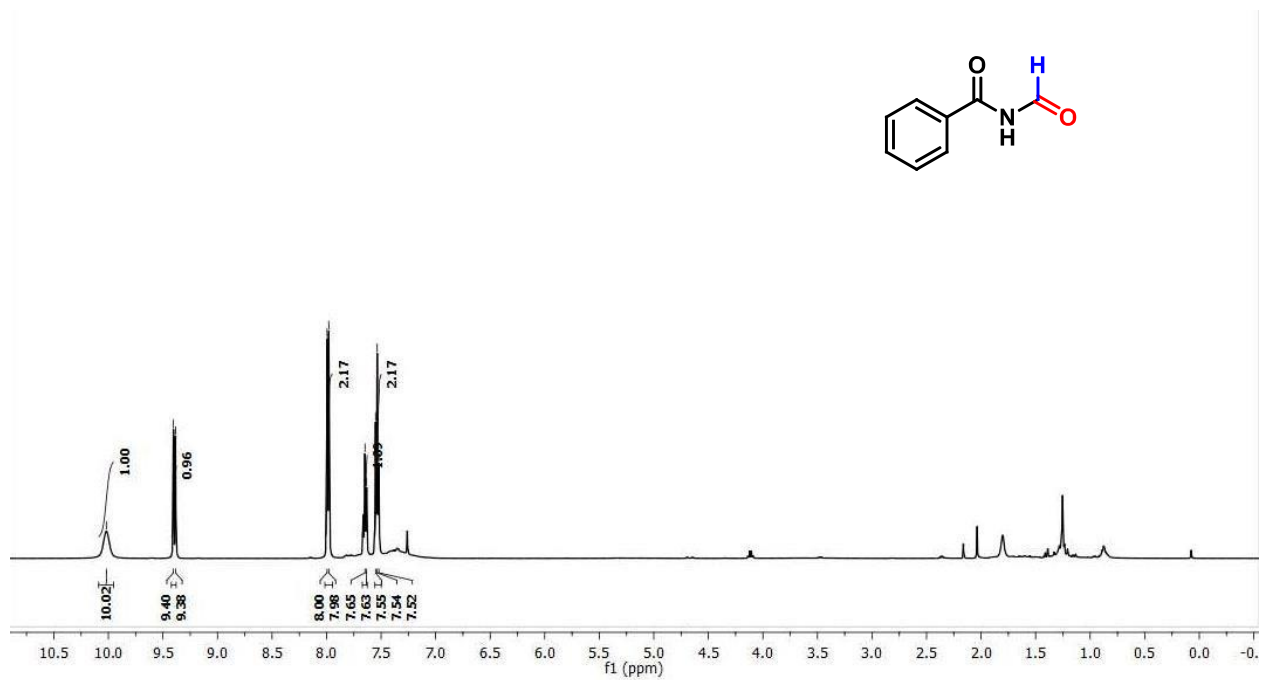

**Fig. S17.**  $^{13}\text{C}$  NMR spectrum ( $\text{CDCl}_3$ ) of N-formylbenzamide (**4a**):

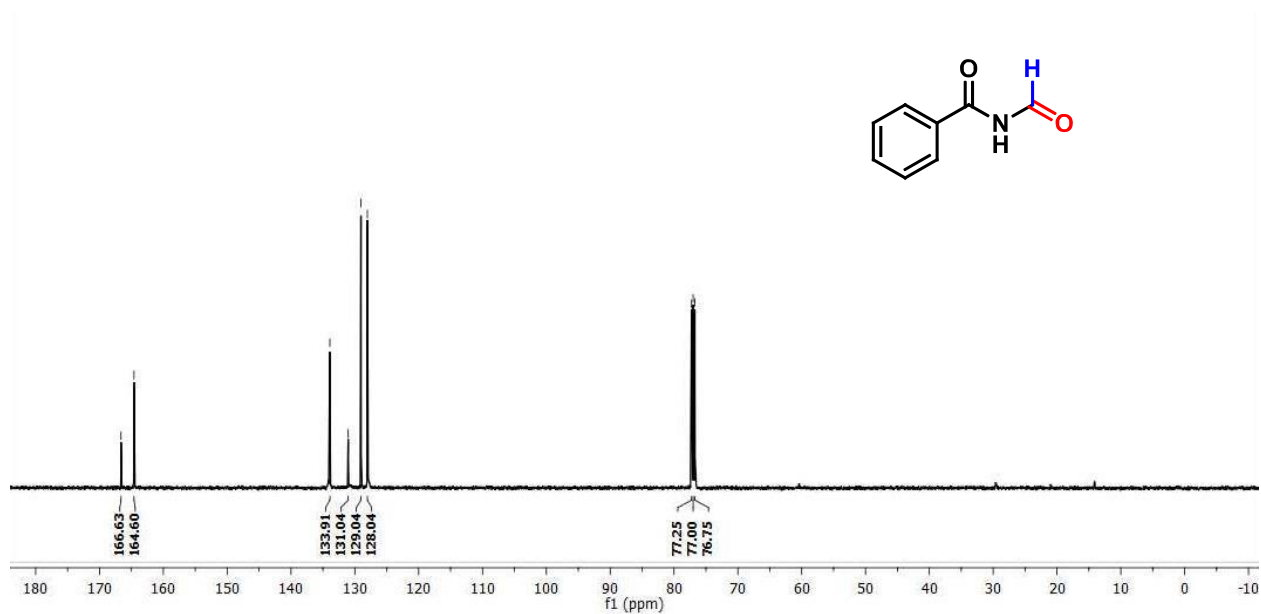

**Fig. S18.**  $^1\text{H}$  NMR spectrum (DMSO- $d_6$ ) of 4-chloro-N-formylbenzamide (**4b**):

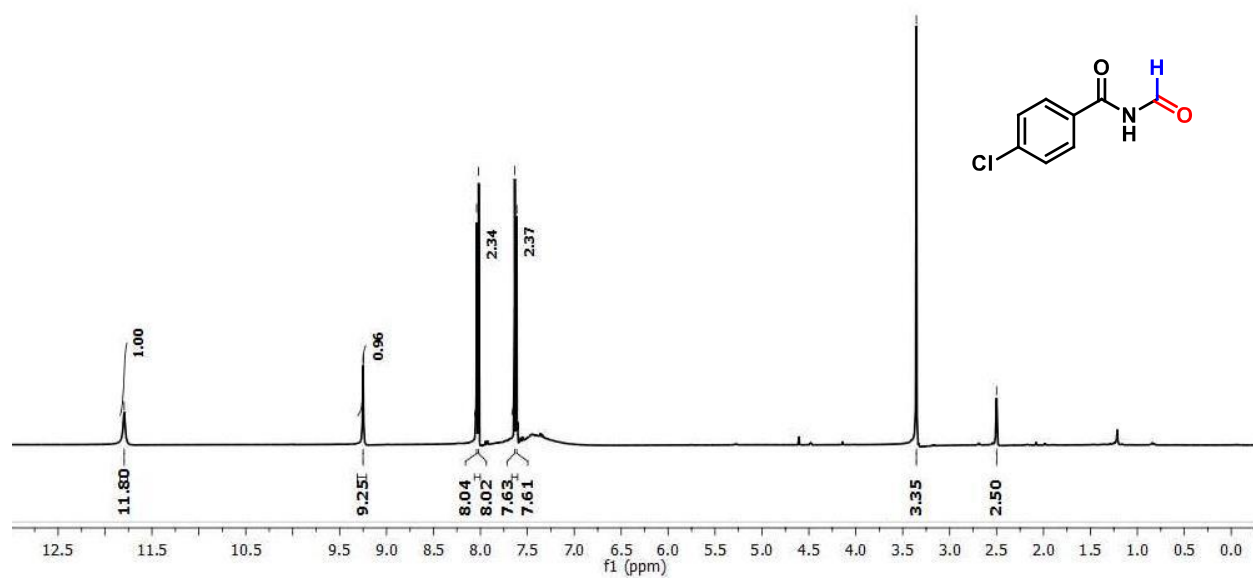

**Fig. S19.**  $^{13}\text{C}$  NMR spectrum (DMSO- $d_6$ ) of 4-chloro-N-formylbenzamide (**4b**):

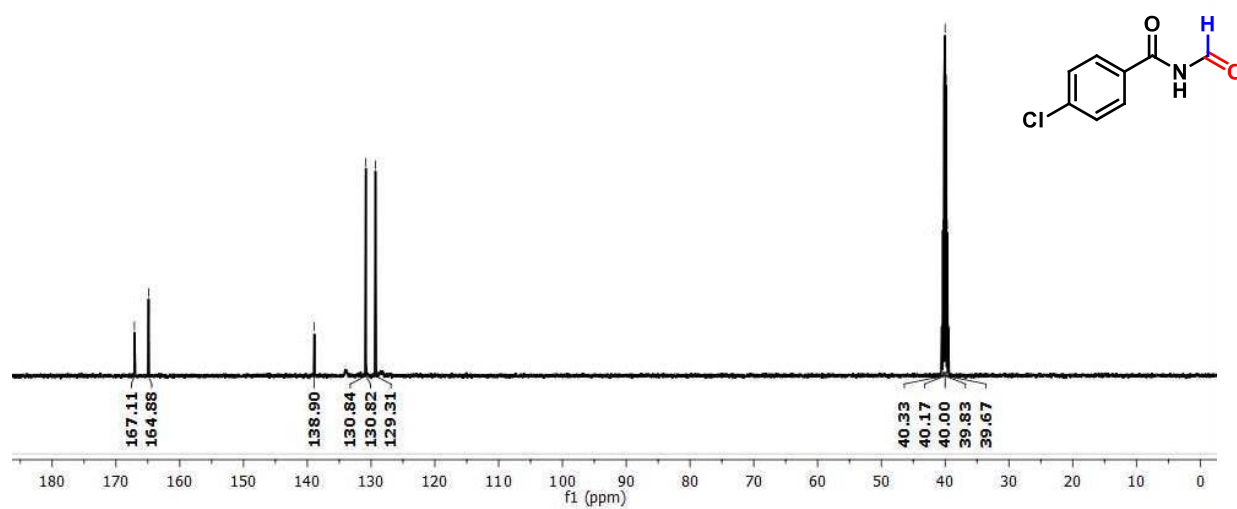

**Fig. S20.**  $^1\text{H}$  NMR spectrum ( $\text{CDCl}_3 + \text{DMSO-d}_6$ ) of N-formyl-4-methoxybenzamide (**4c**):

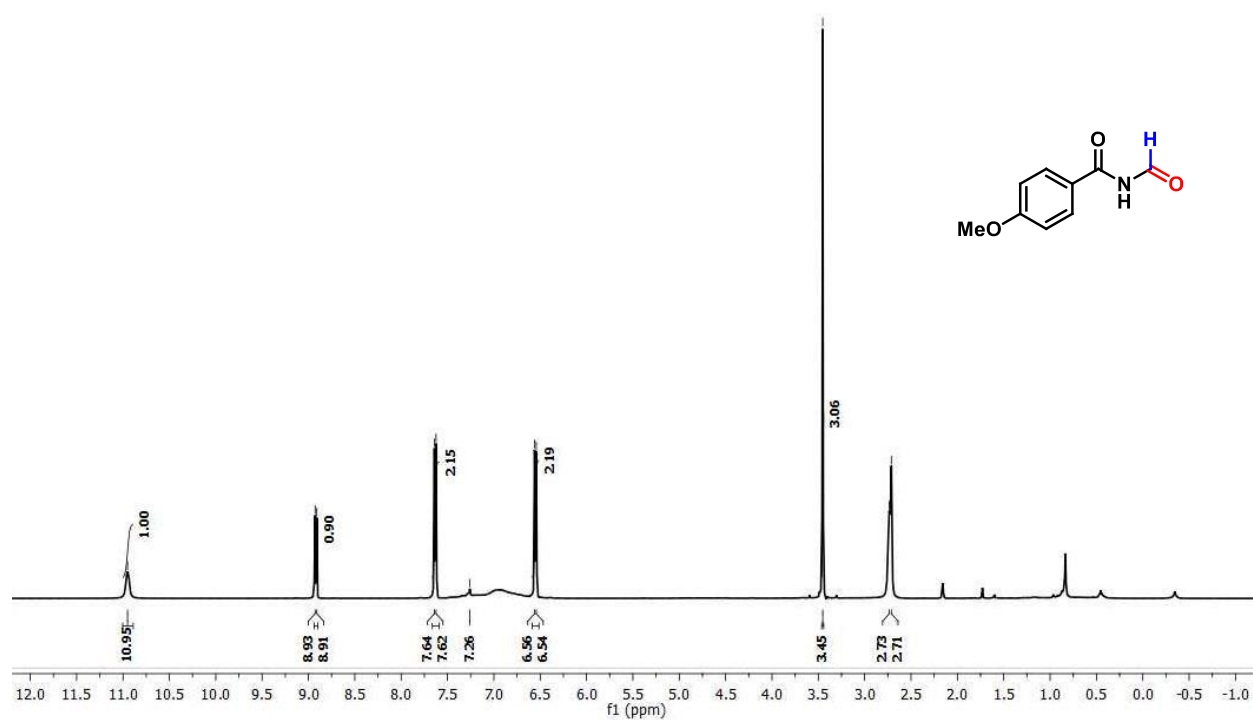

**Fig. S21.**  $^{13}\text{C}$  NMR spectrum ( $\text{CDCl}_3 + \text{DMSO-d}_6$ ) of N-formyl-4-methoxybenzamide (**4c**):

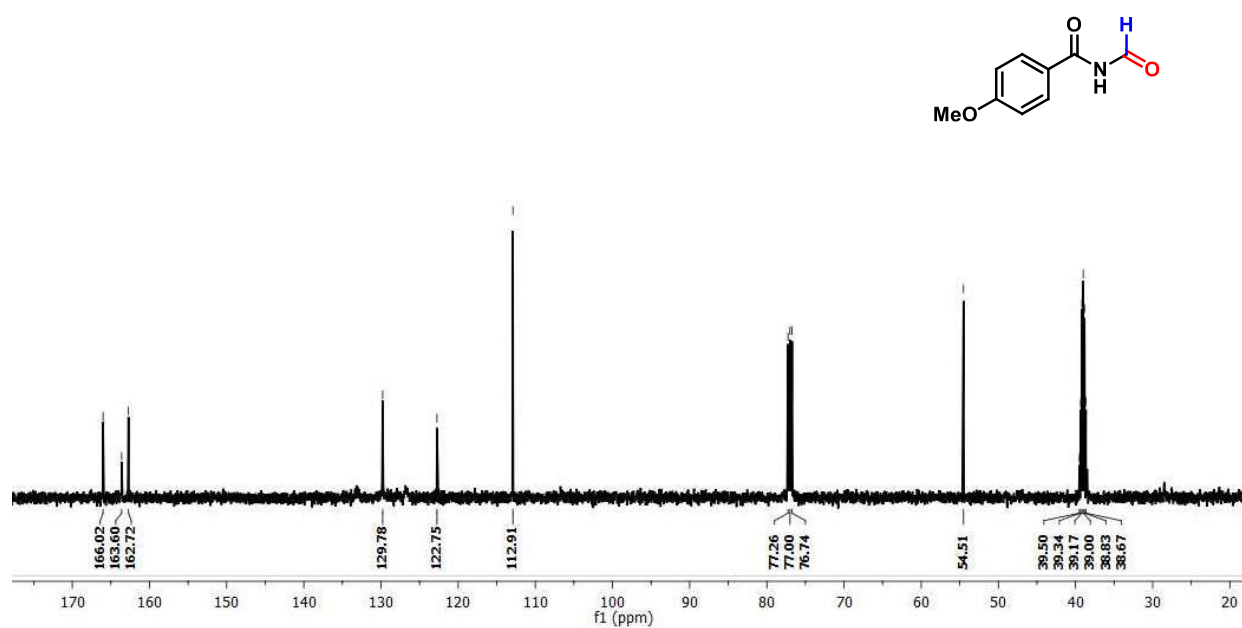

**Fig. S22.**  $^1\text{H}$  NMR spectrum ( $\text{CDCl}_3$ ) of N-formyl-3-methylbenzamide (**4d**):

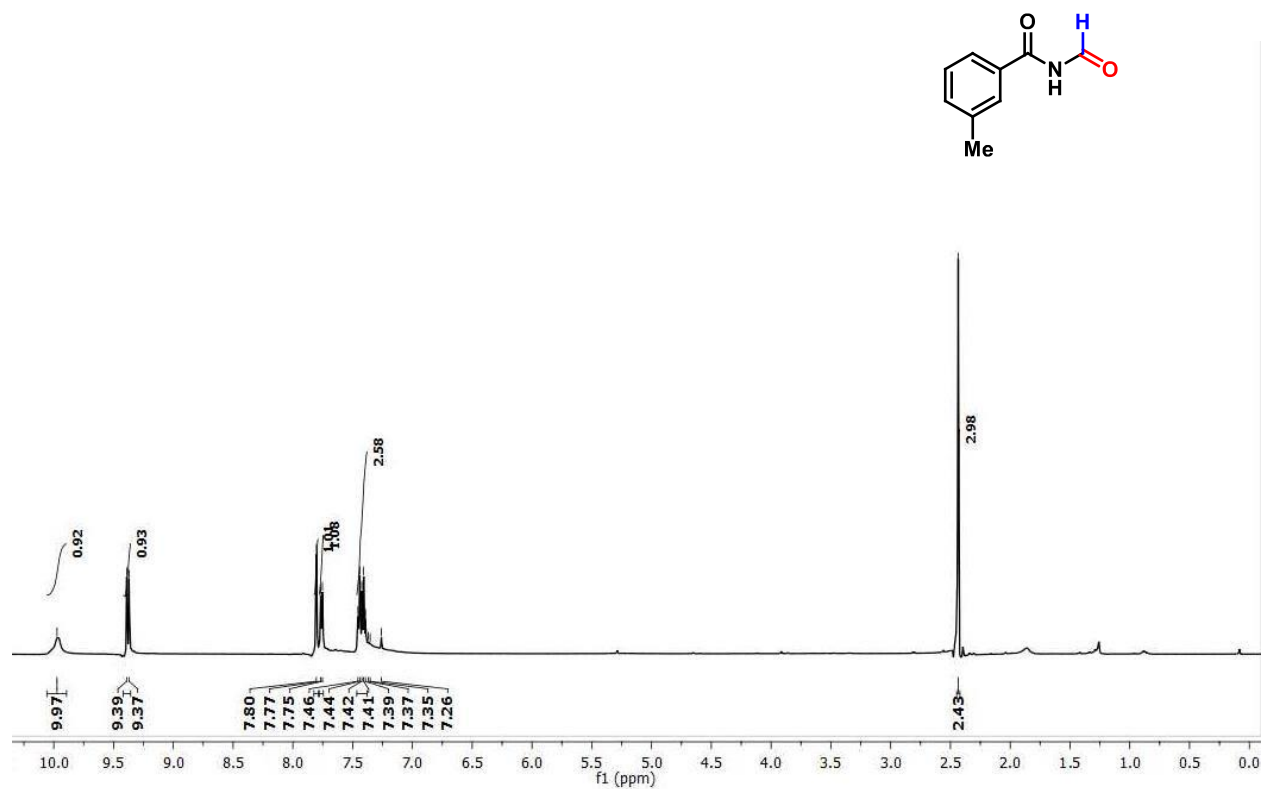

**Fig. S23.**  $^{13}\text{C}$  NMR spectrum ( $\text{CDCl}_3$ ) of N-formyl-3-methylbenzamide (**4d**):

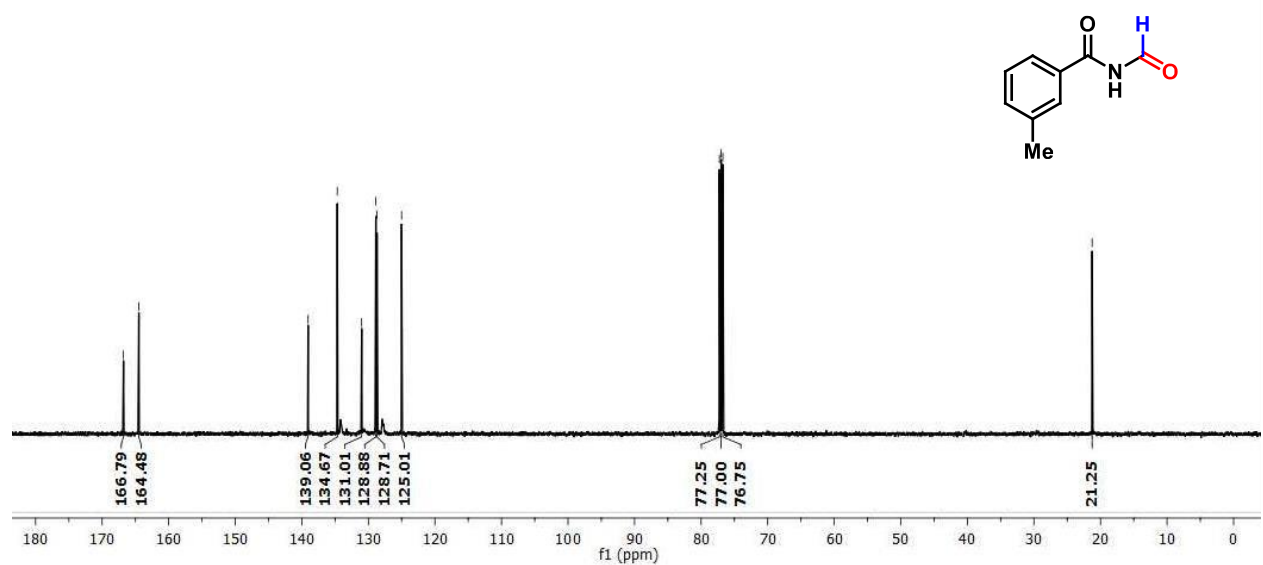



**Fig. S24.**  $^1\text{H}$  NMR spectrum (DMSO- $d_6$ ) of N-formyl-3-methoxybenzamide (**4e**):

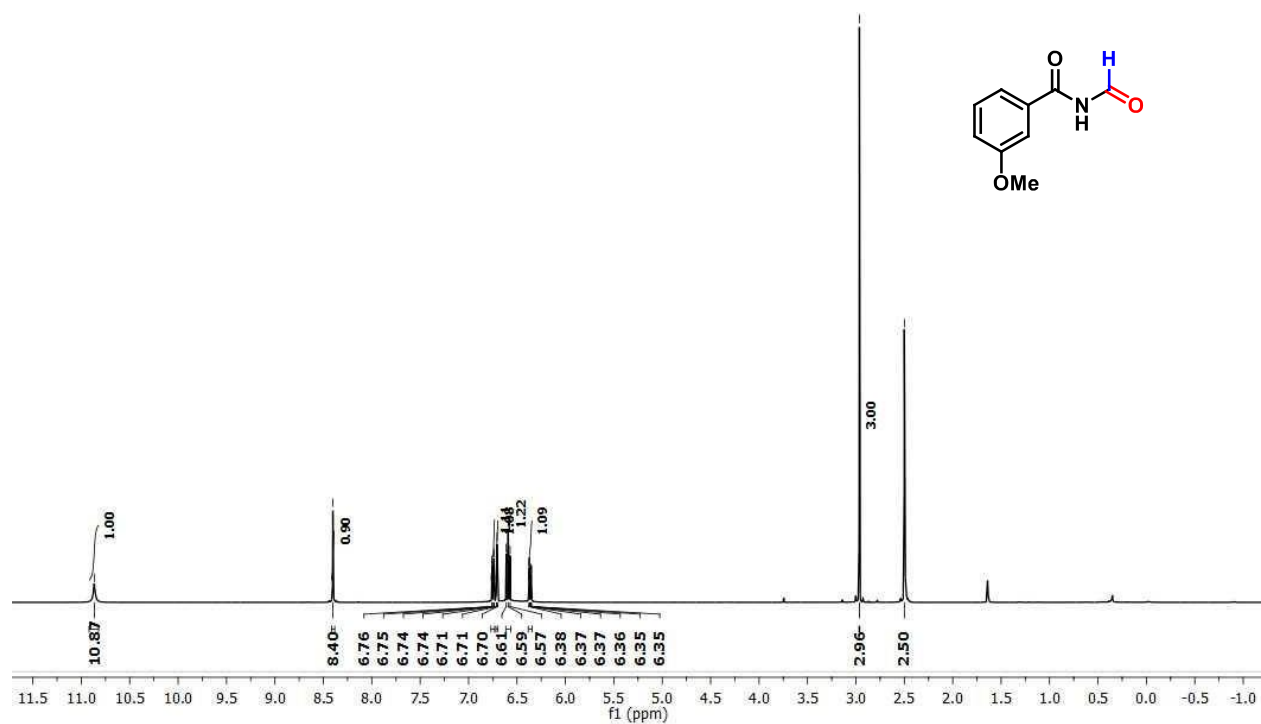

**Fig. S25.**  $^{13}\text{C}$  NMR spectrum (DMSO- $d_6$ ) of N-formyl-3-methoxybenzamide (**4e**):

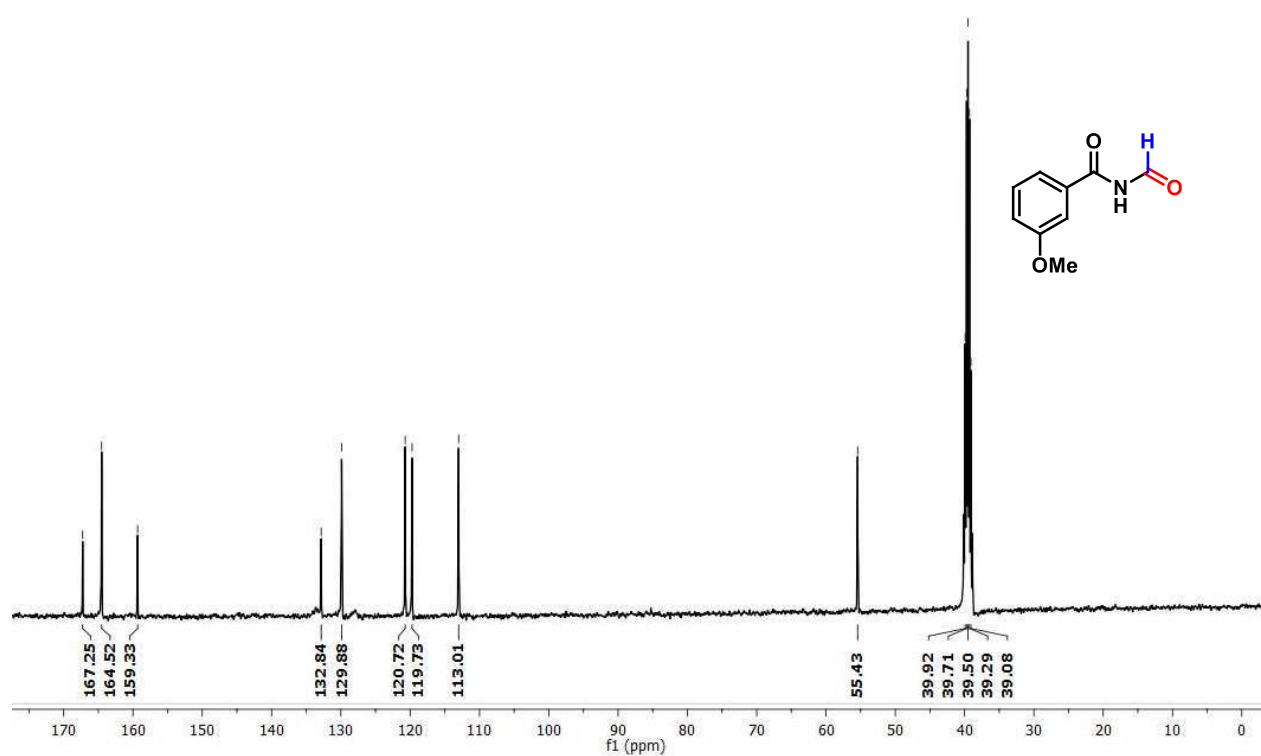

**Fig. S26.**  $^1\text{H}$  NMR spectrum ( $\text{CDCl}_3$ ) of N-formyl-2-methylbenzamide (**4f**):

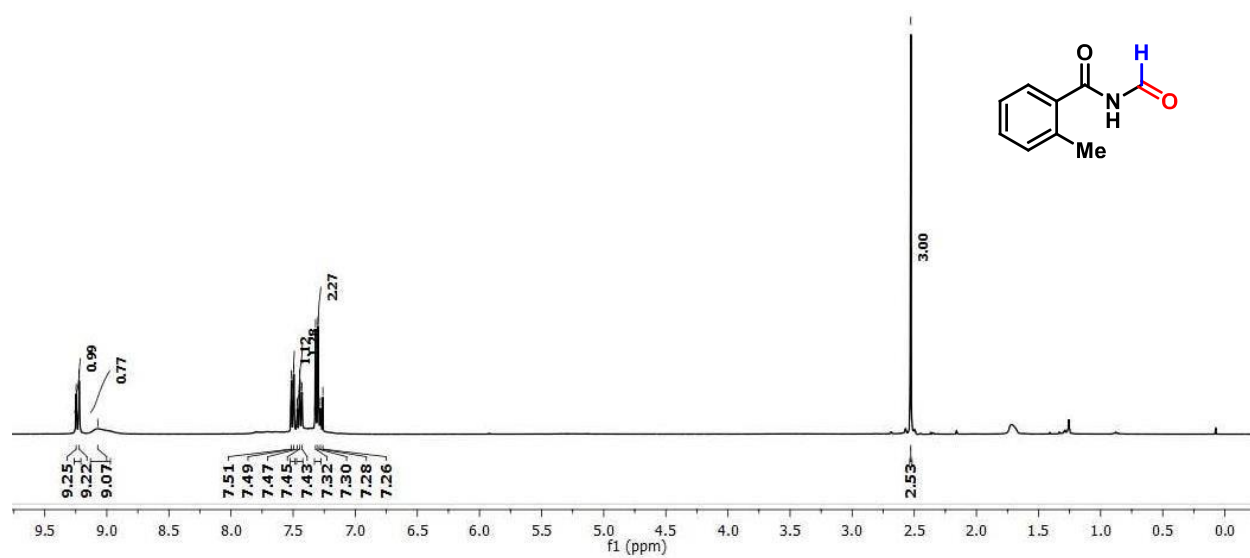

**Fig. S27.**  $^{13}\text{C}$  NMR spectrum ( $\text{CDCl}_3$ ) of N-formyl-2-methylbenzamide (**4f**):

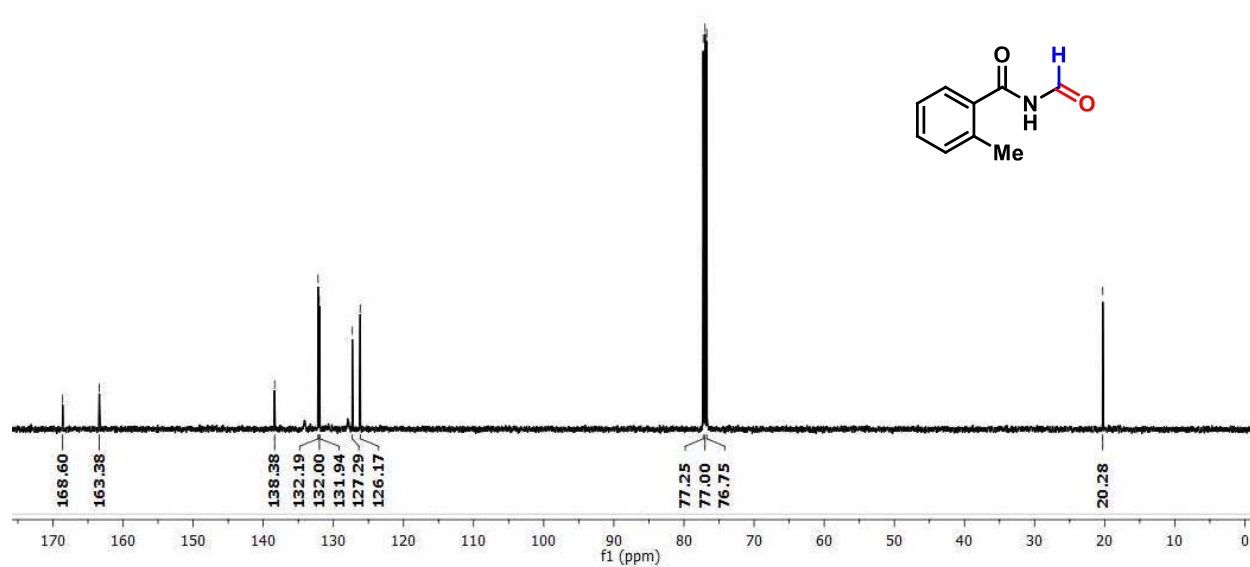

**Fig. S28.**  $^1\text{H}$  NMR spectrum ( $\text{CDCl}_3$ ) of N-formyl-2-methoxybenzamide (**4g**):

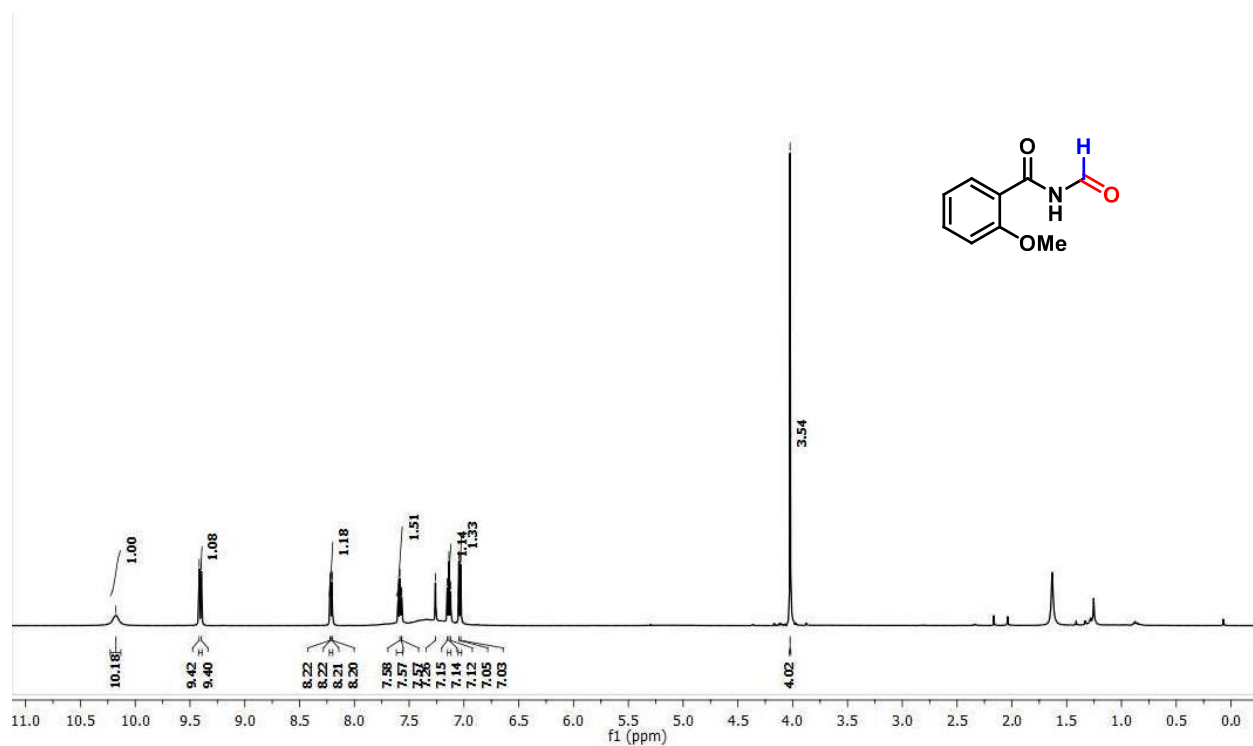

**Fig. S29.**  $^{13}\text{C}$  NMR spectrum ( $\text{CDCl}_3$ ) of N-formyl-2-methoxybenzamide (**4g**):

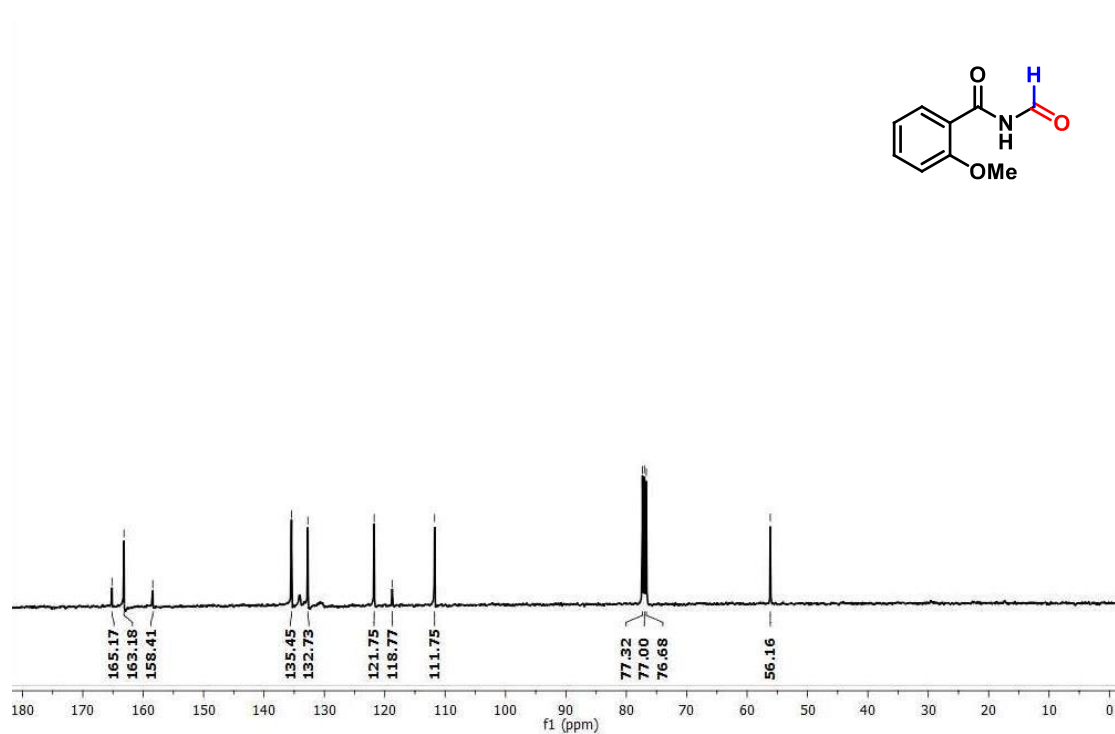

**Fig. S30.**  $^1\text{H}$  NMR spectrum ( $\text{CDCl}_3 + \text{DMSO-d}_6$ ) of 4-bromo-N-formyl-3-methylbenzamide

(4h):

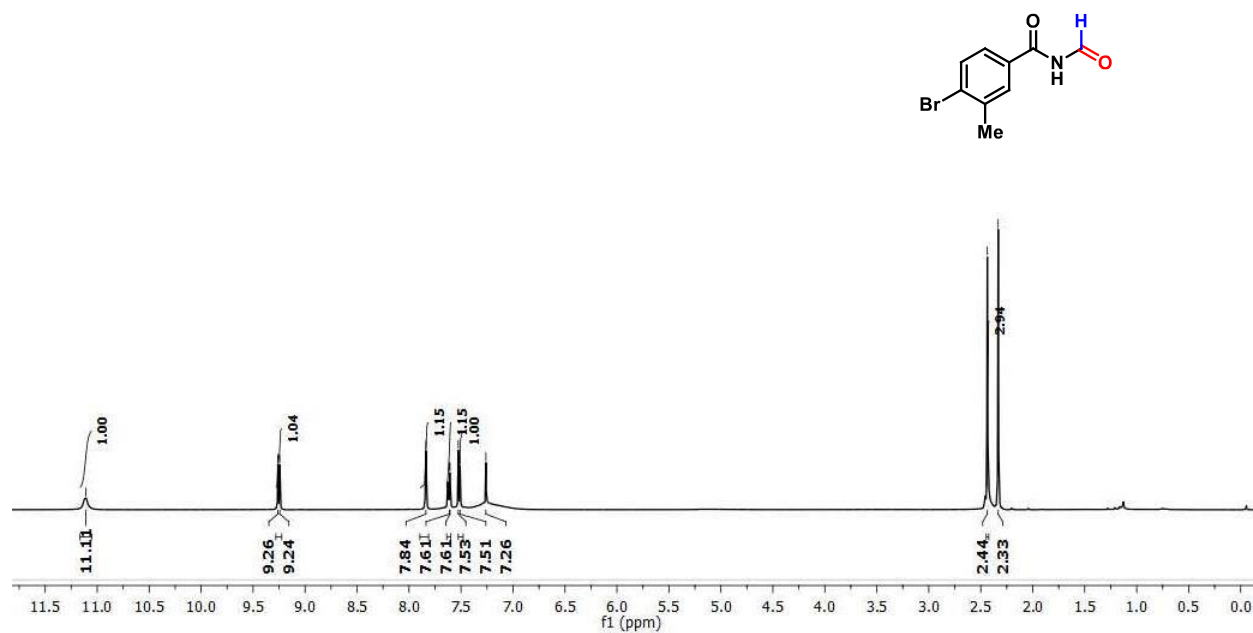

**Fig. S31.**  $^{13}\text{C}$  NMR spectrum ( $\text{CDCl}_3 + \text{DMSO-d}_6$ ) of 4-bromo-N-formyl-3-methylbenzamide

(4h):

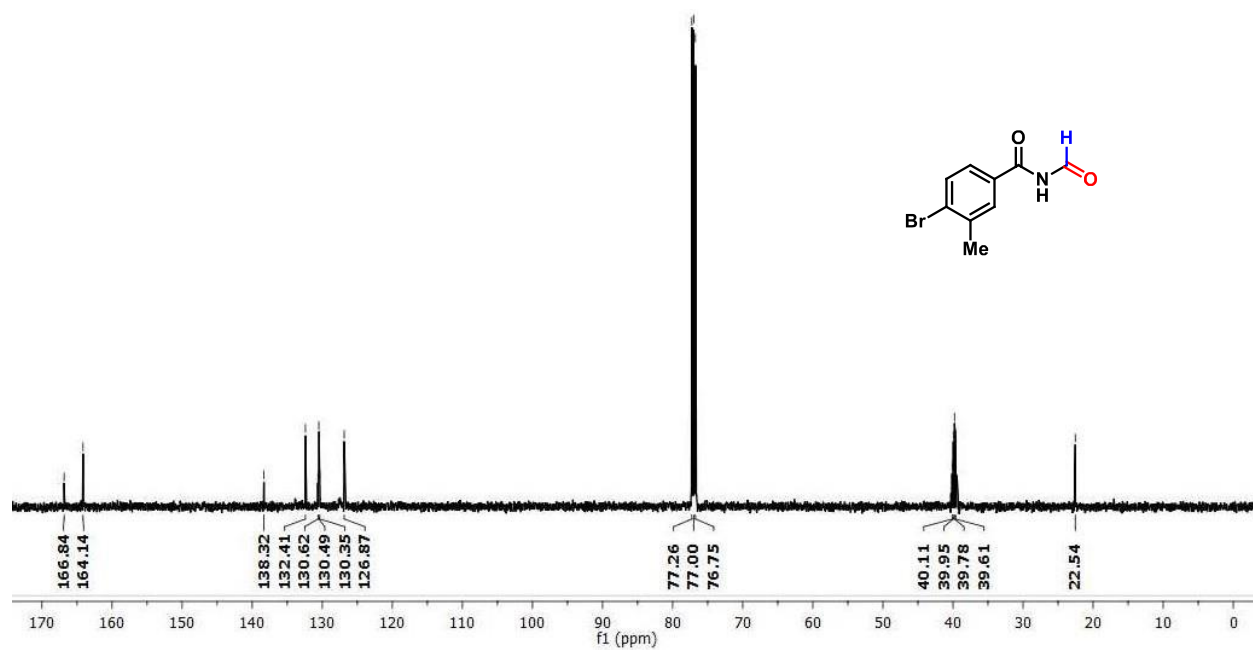

**Fig. S32.**  $^1\text{H}$  NMR spectrum ( $\text{CDCl}_3$ ) of N-formyl-3,4-dimethylbenzamide (**4i**):

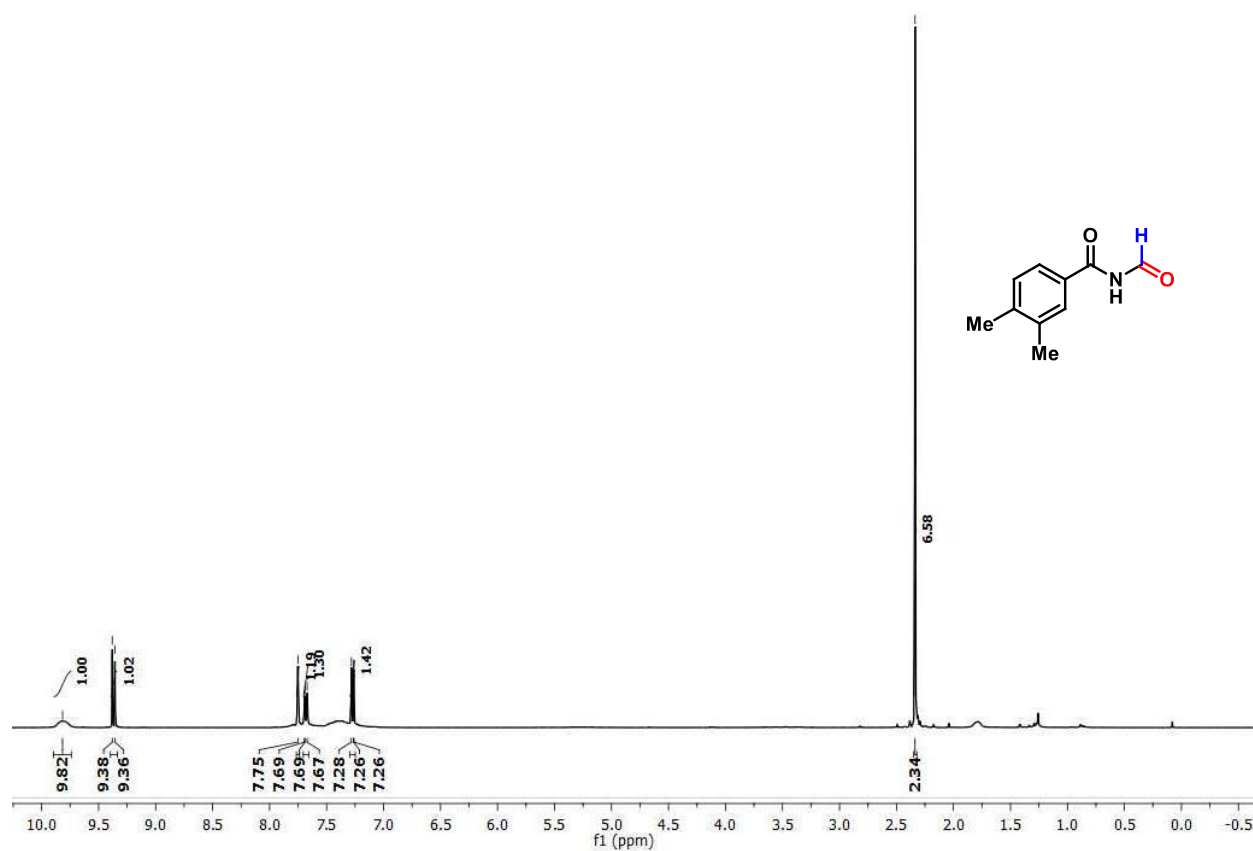

**Fig. S33.**  $^{13}\text{C}$  NMR spectrum ( $\text{CDCl}_3$ ) of N-formyl-3,4-dimethylbenzamide (**4i**):

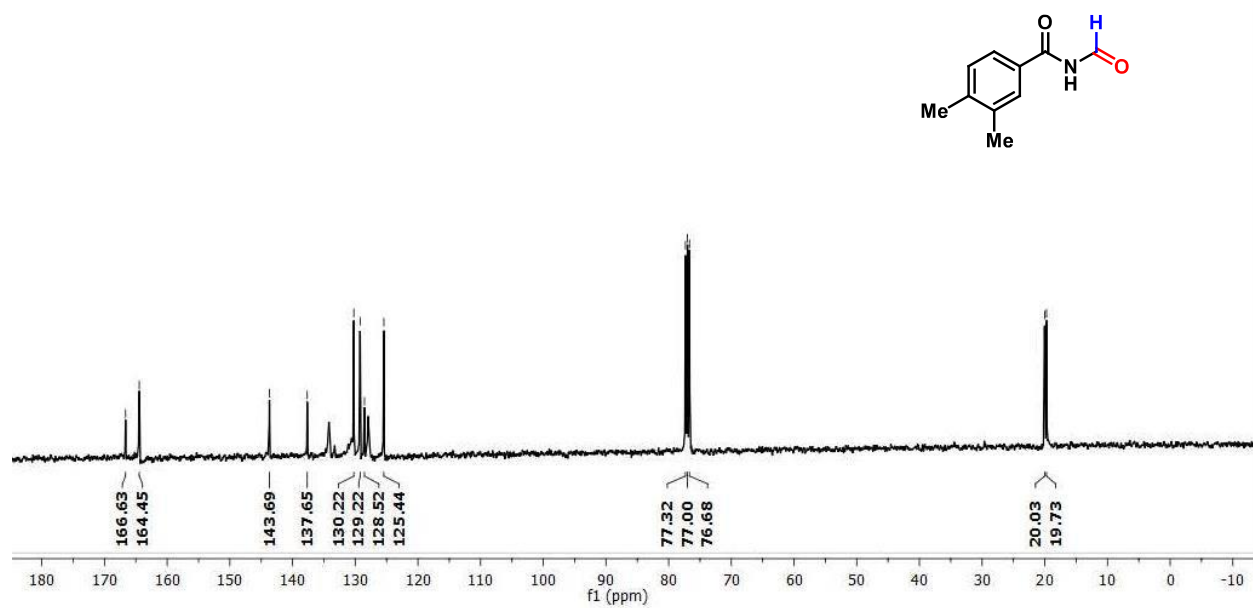

**Fig. S34.**  $^1\text{H}$  NMR spectrum ( $\text{CDCl}_3$ ) of 2-ethoxy-N-formylbenzamide (**4j**):

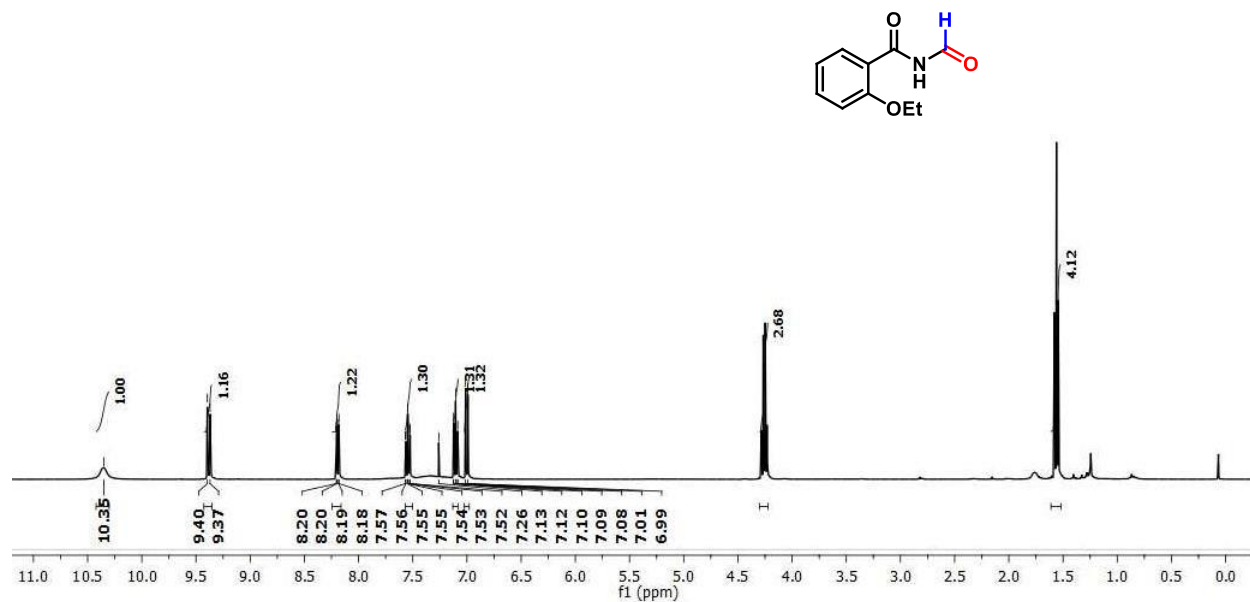

**Fig. S35.**  $^{13}\text{C}$  NMR spectrum ( $\text{CDCl}_3$ ) of 2-ethoxy-N-formylbenzamide (**4j**):

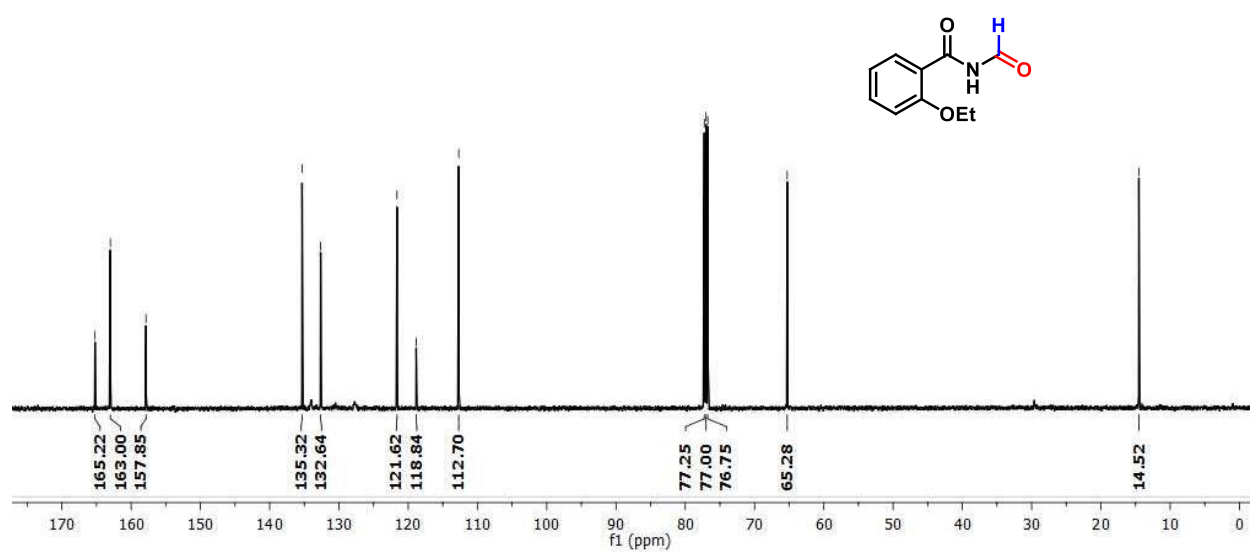

**Fig. S36.**  $^1\text{H}$  NMR spectrum ( $\text{CDCl}_3$ ) of N-formyl-4-methylbenzamide (**4k**):

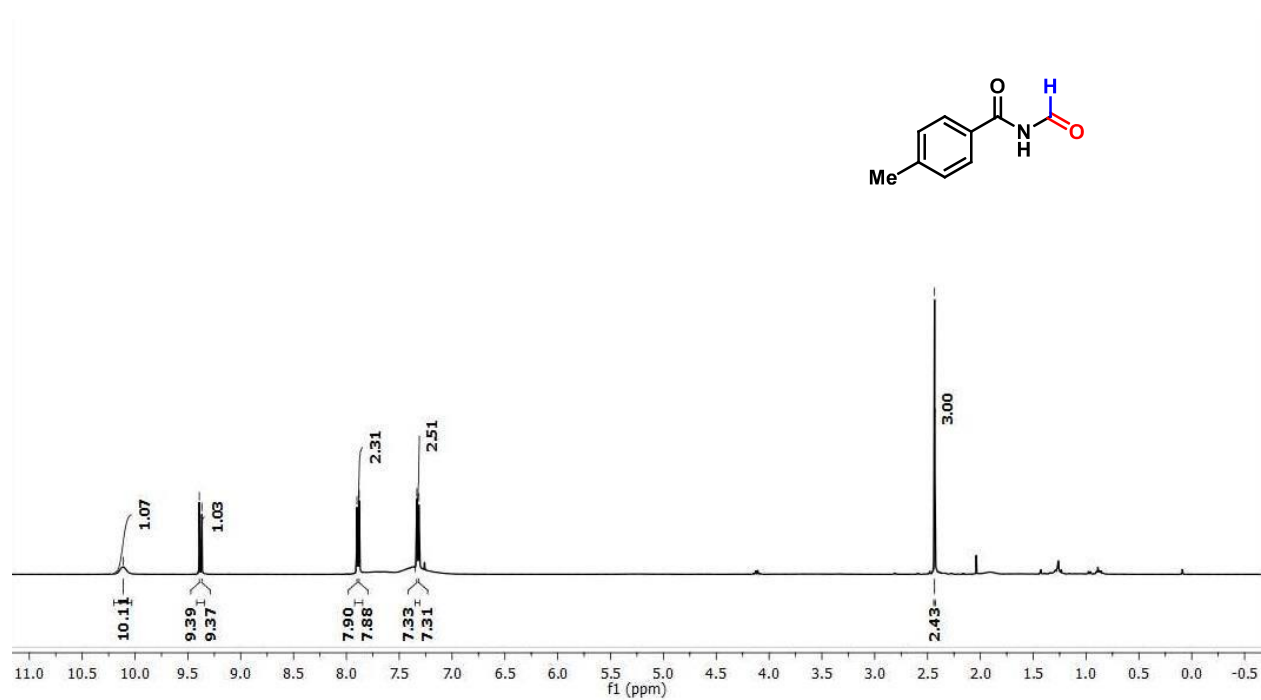

**Fig. S37.**  $^{13}\text{C}$  NMR spectrum ( $\text{CDCl}_3$ ) of N-formyl-4-methylbenzamide (**4k**):

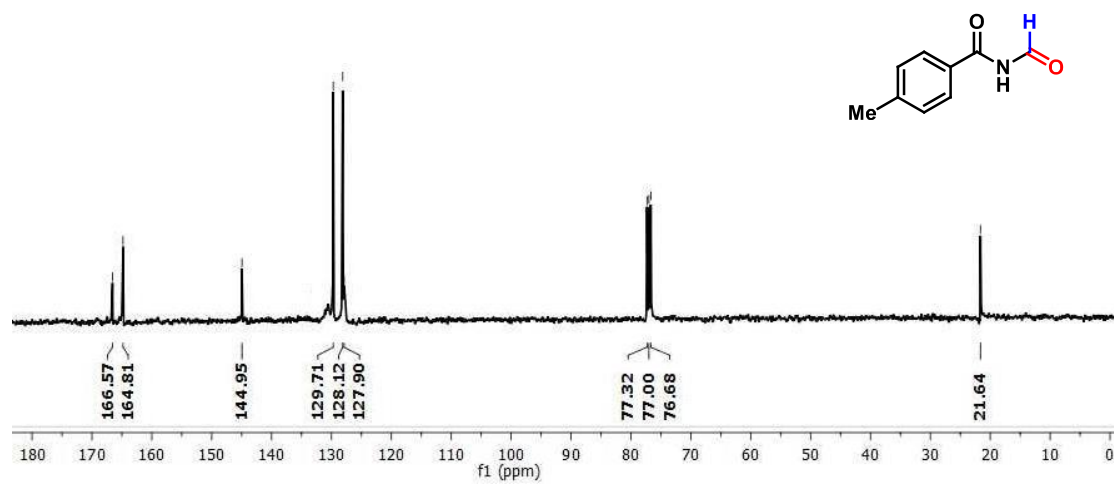

**Fig. S38.**  $^1\text{H}$  NMR spectrum (DMSO- $d_6$ ) of N-formyl-3,5-dimethoxybenzamide (**41**):

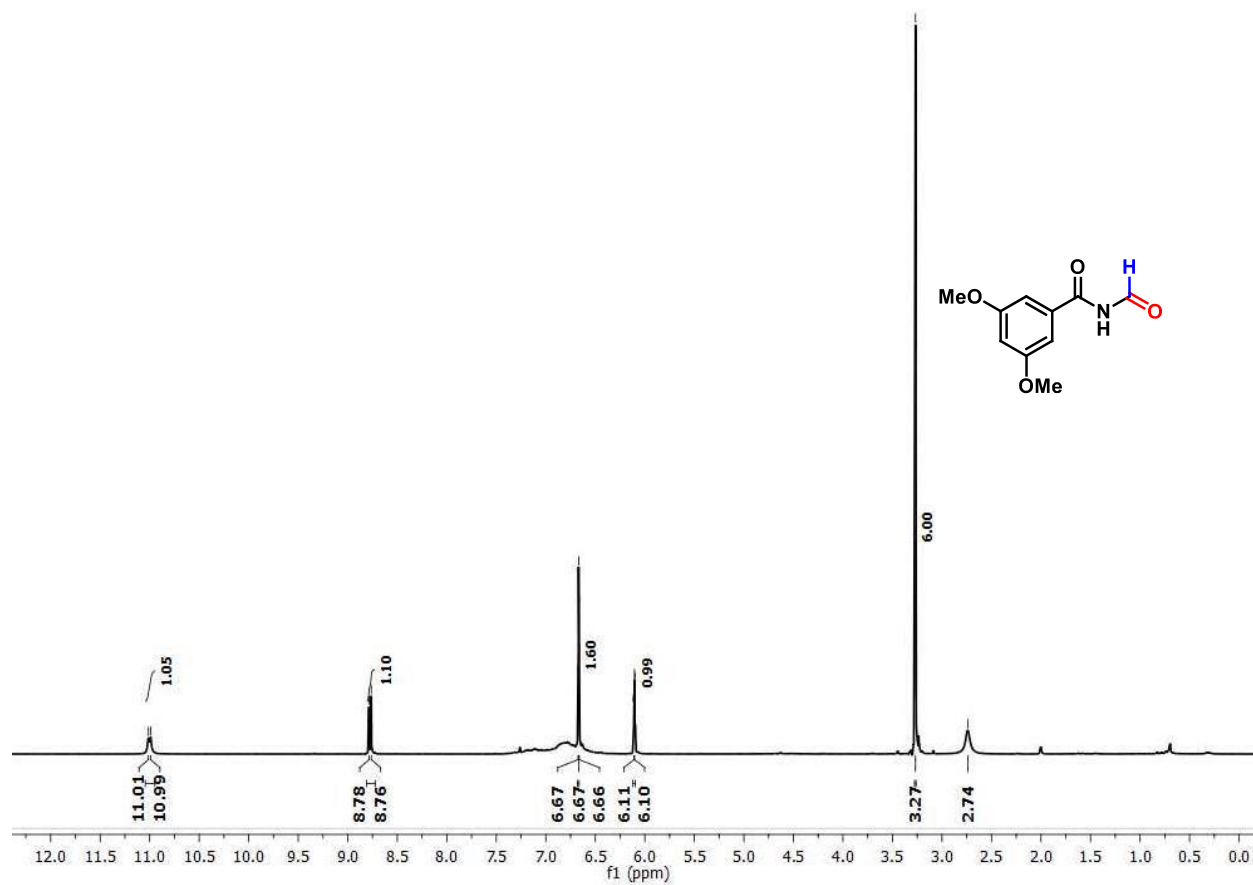

**Fig. S39.**  $^{13}\text{C}$  NMR spectrum (DMSO- $d_6$ ) of N-formyl-3,5-dimethoxybenzamide (**41**):

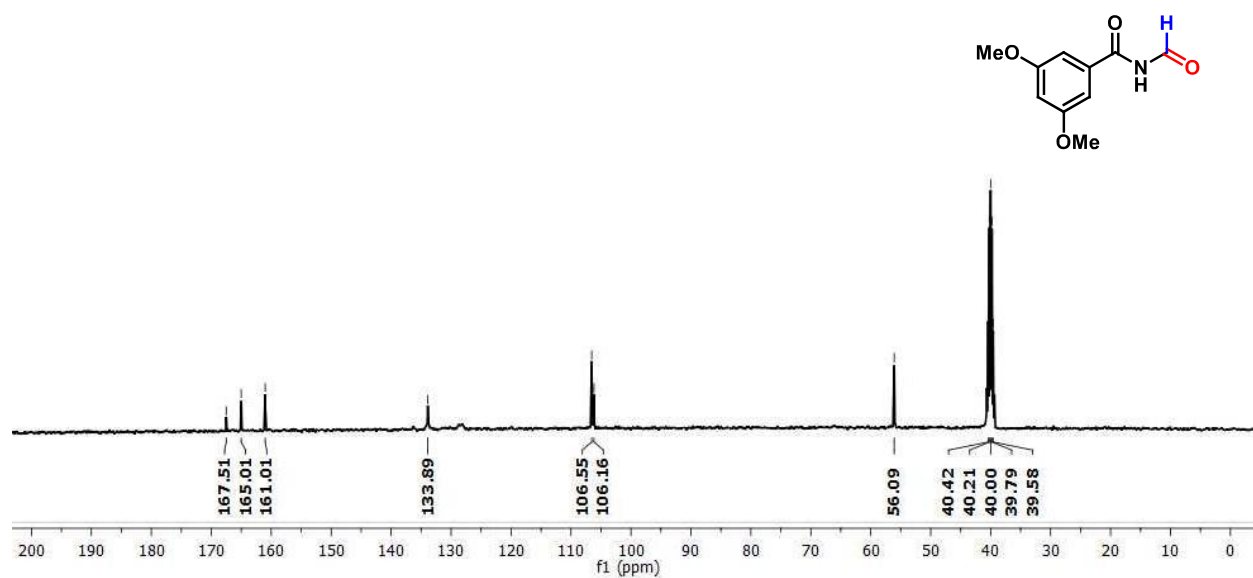



**Fig. S40.**  $^1\text{H}$  NMR spectrum ( $\text{CDCl}_3$ ) of N-formyl-3-(trifluoromethyl)benzamide (**4m**):

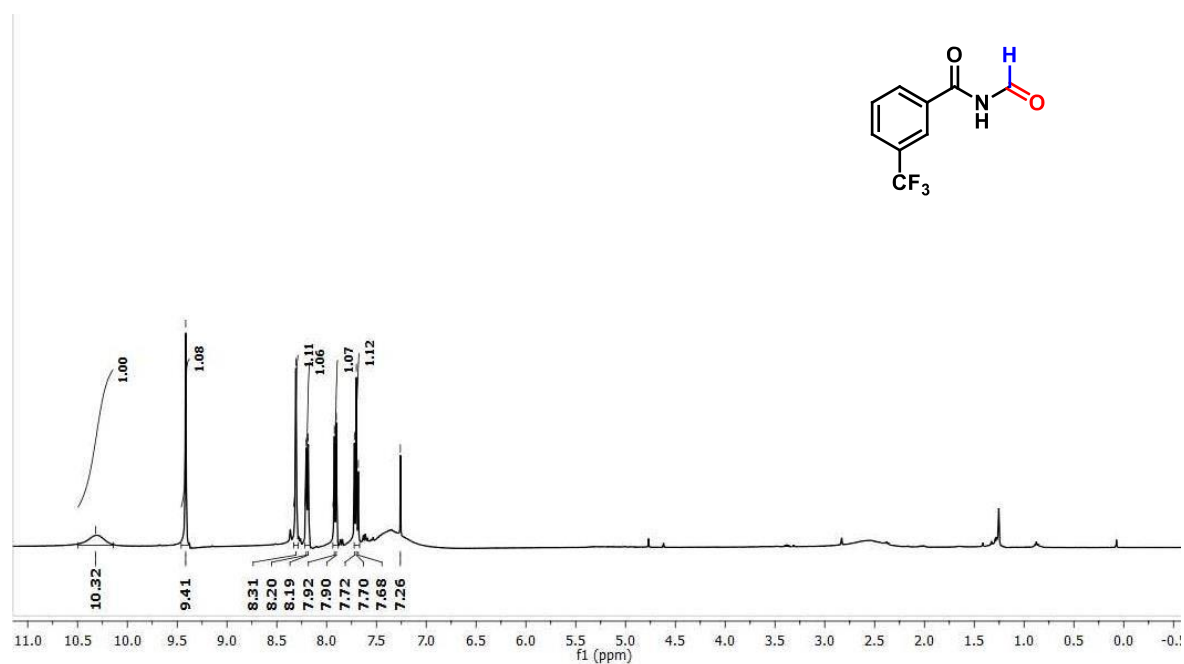

**Fig. S41.**  $^{13}\text{C}$  NMR spectrum ( $\text{CDCl}_3$ ) of N-formyl-3-(trifluoromethyl)benzamide (**4m**):

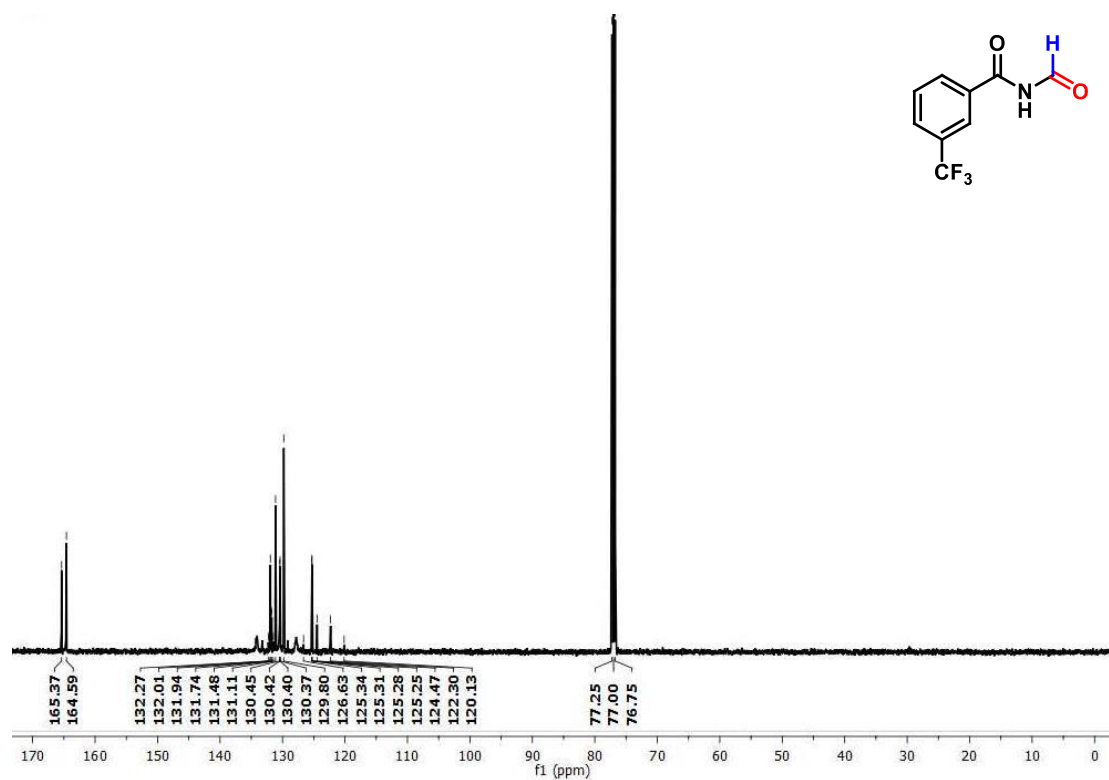

**Fig. S42.**  $^1\text{H}$  NMR spectrum ( $\text{CDCl}_3$ ) of N-formyl-2-fluorobenzamide (**4n**):

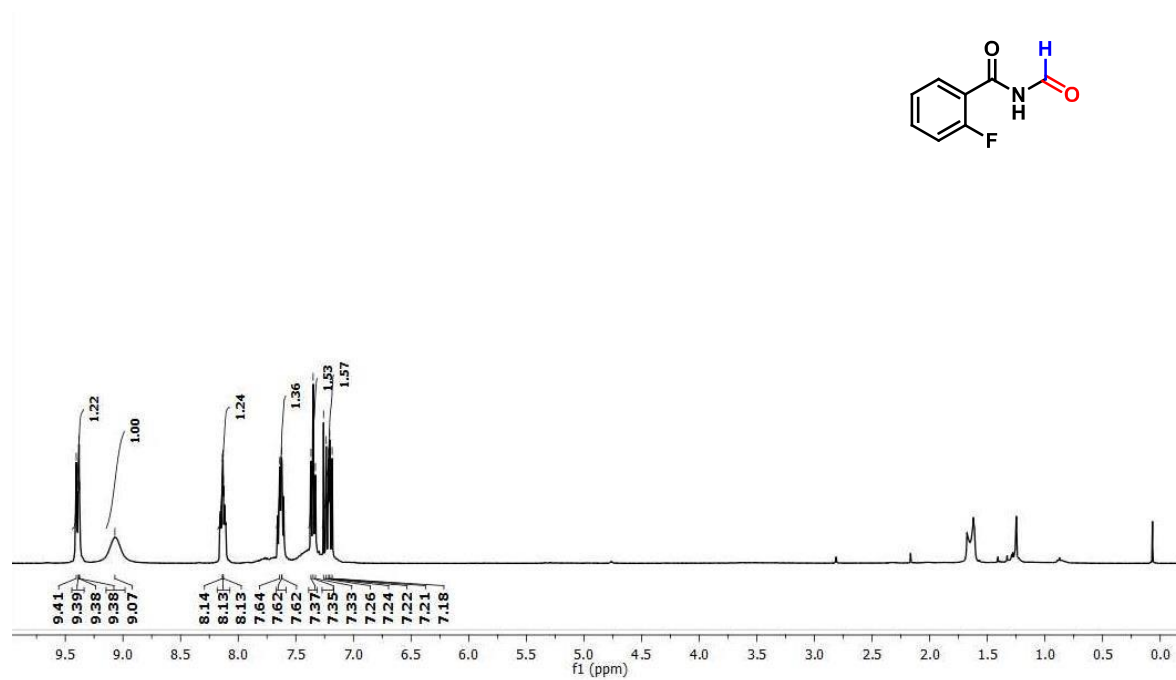

**Fig. S43.**  $^{13}\text{C}$  NMR spectrum ( $\text{CDCl}_3$ ) of N-formyl-2-fluorobenzamide (**4n**):

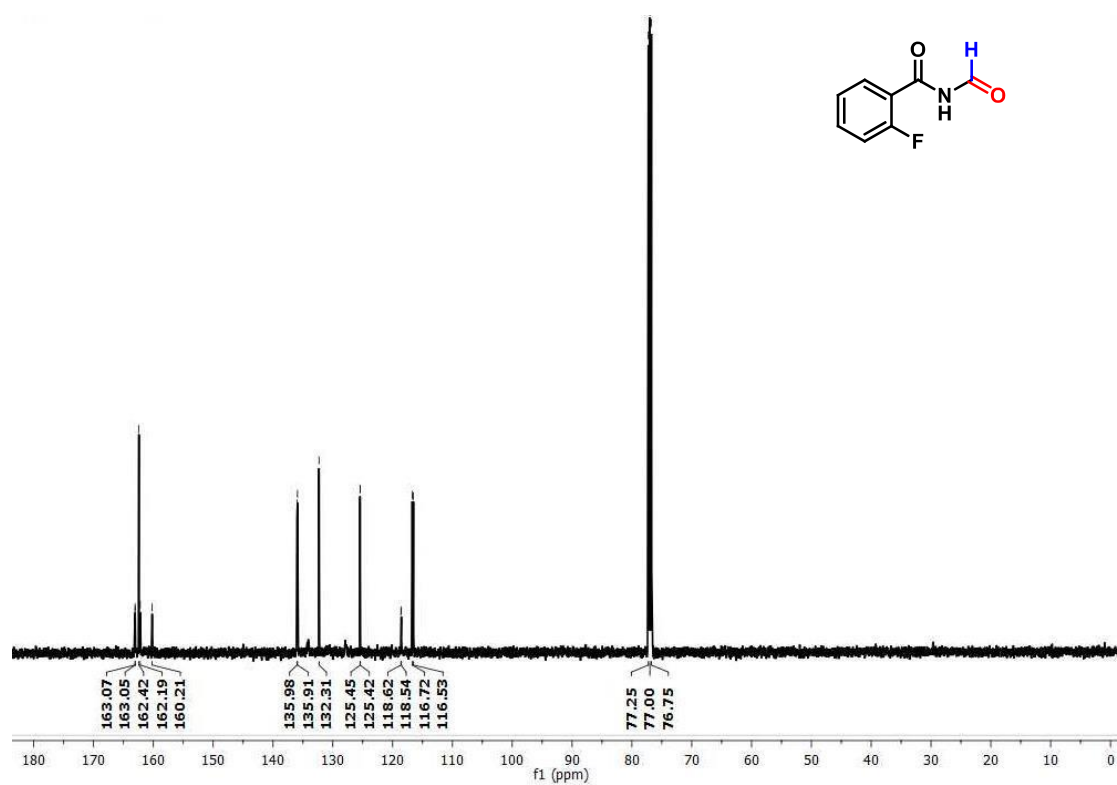

**Fig. S44.**  $^1\text{H}$  NMR spectrum ( $\text{CDCl}_3$ ) of N-formylthiophene-2-carboxamide (**4o**):

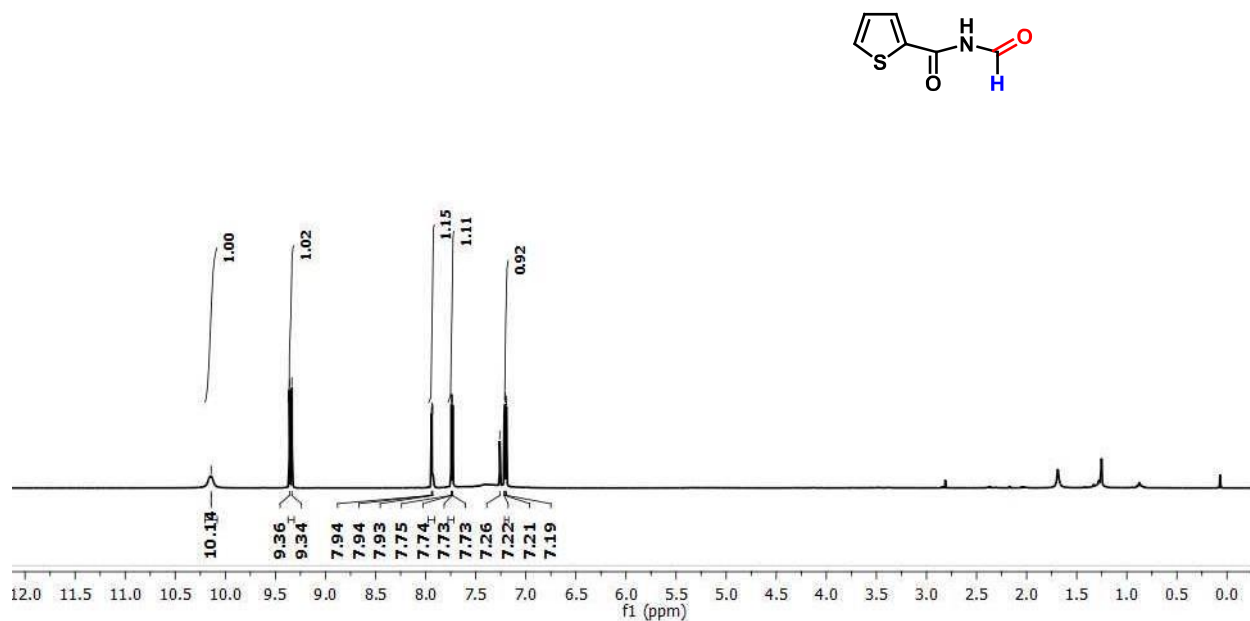

**Fig. S45.**  $^{13}\text{C}$  NMR spectrum ( $\text{CDCl}_3$ ) of N-formylthiophene-2-carboxamide (**4o**):

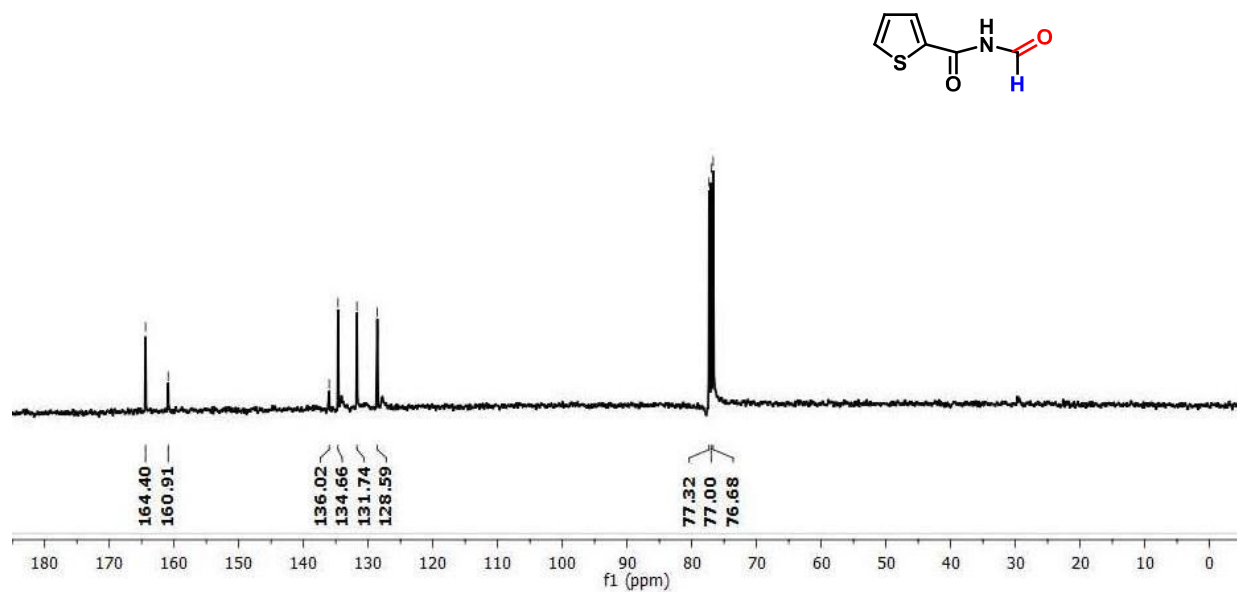

**Fig. S46.**  $^1\text{H}$  NMR spectrum ( $\text{CDCl}_3$ ) of N-formylcinnamamide (**4p**):

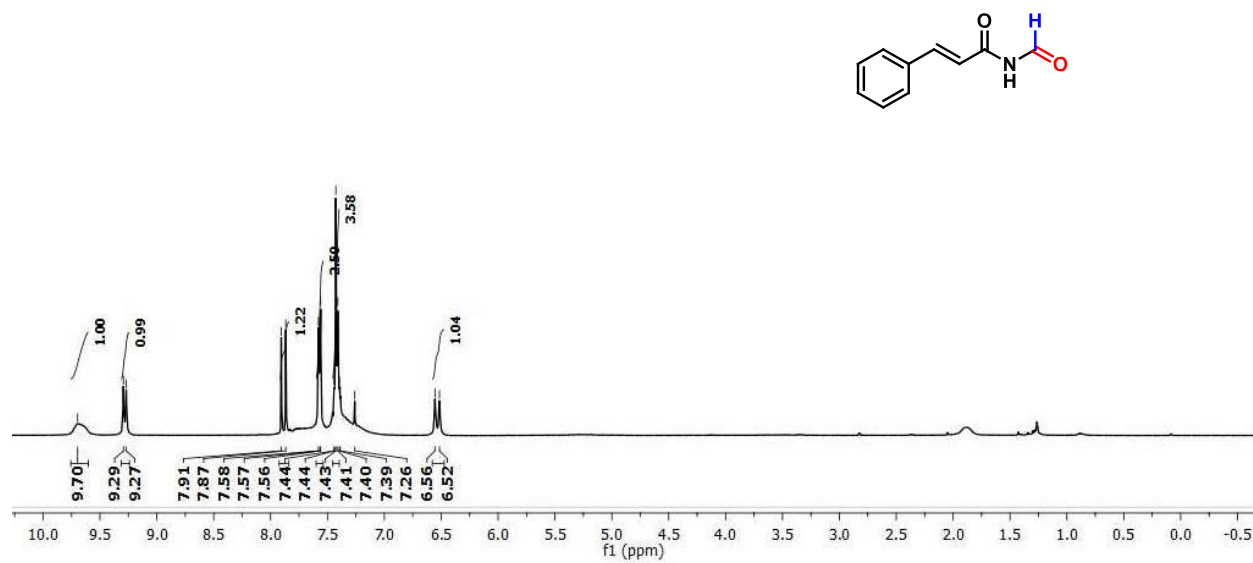

**Fig. S47.**  $^{13}\text{C}$  NMR spectrum ( $\text{CDCl}_3$ ) of N-formylcinnamamide (**4p**):

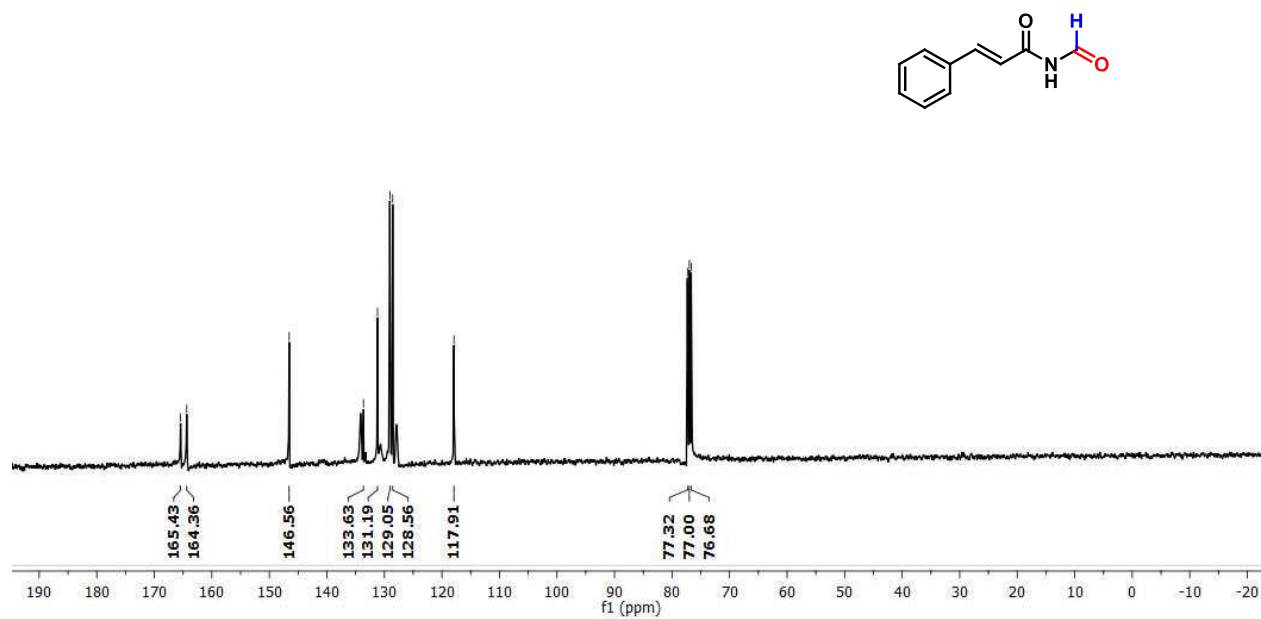

**Fig. S48.**  $^1\text{H}$  NMR spectrum ( $\text{CDCl}_3$ ) of N-formyl-[1,1'-biphenyl]-4-carboxamide (**4q**):

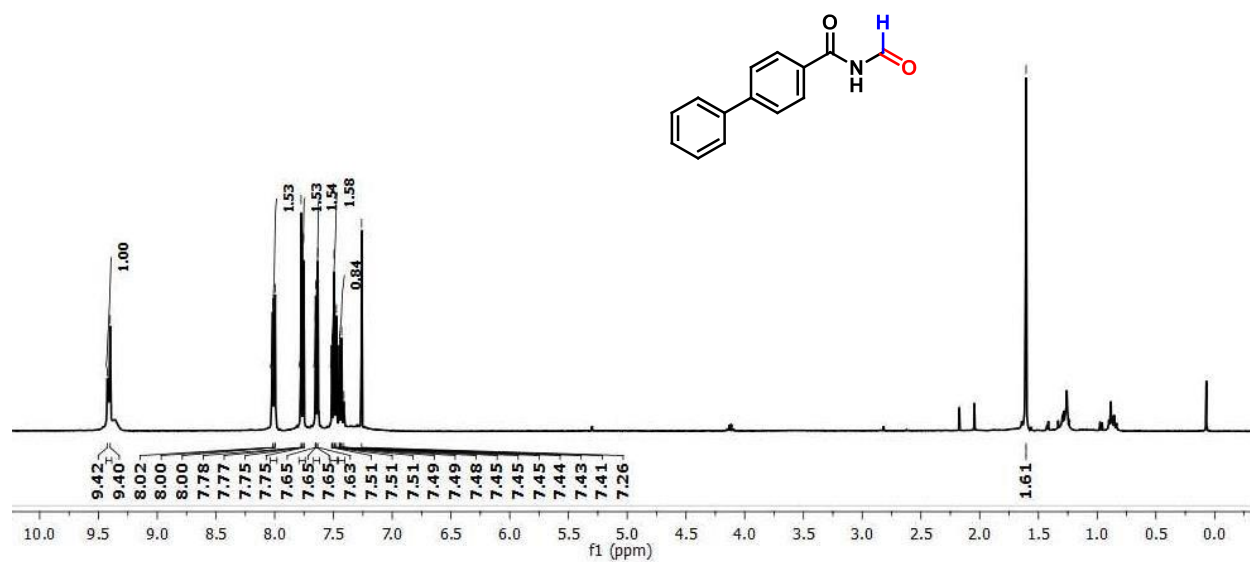

**Fig. S49.**  $^{13}\text{C}$  NMR spectrum ( $\text{CDCl}_3$ ) of N-formyl-[1,1'-biphenyl]-4-carboxamide (**4q**):

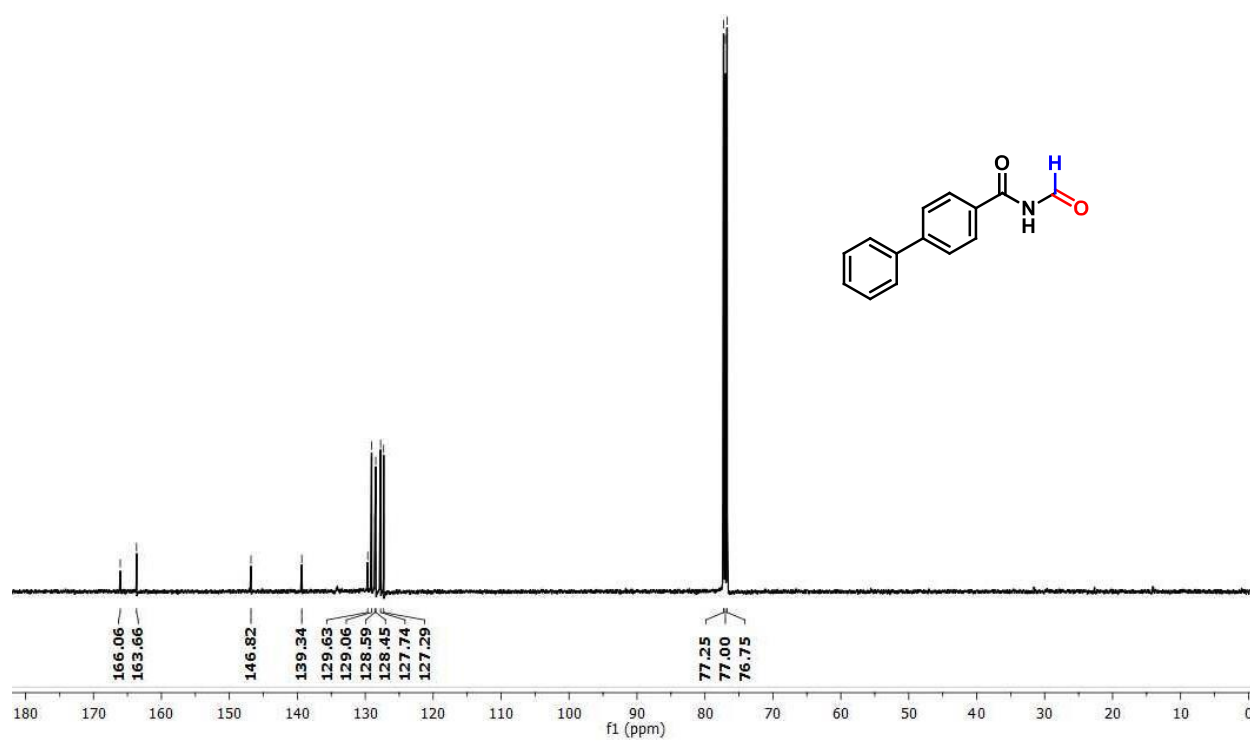

**Fig. S50.**  $^1\text{H}$  NMR spectrum ( $\text{CDCl}_3 + \text{DMSO-d}_6$ ) of N-formylbenzo[b]thiophene-2-carboxamide (**4r**):

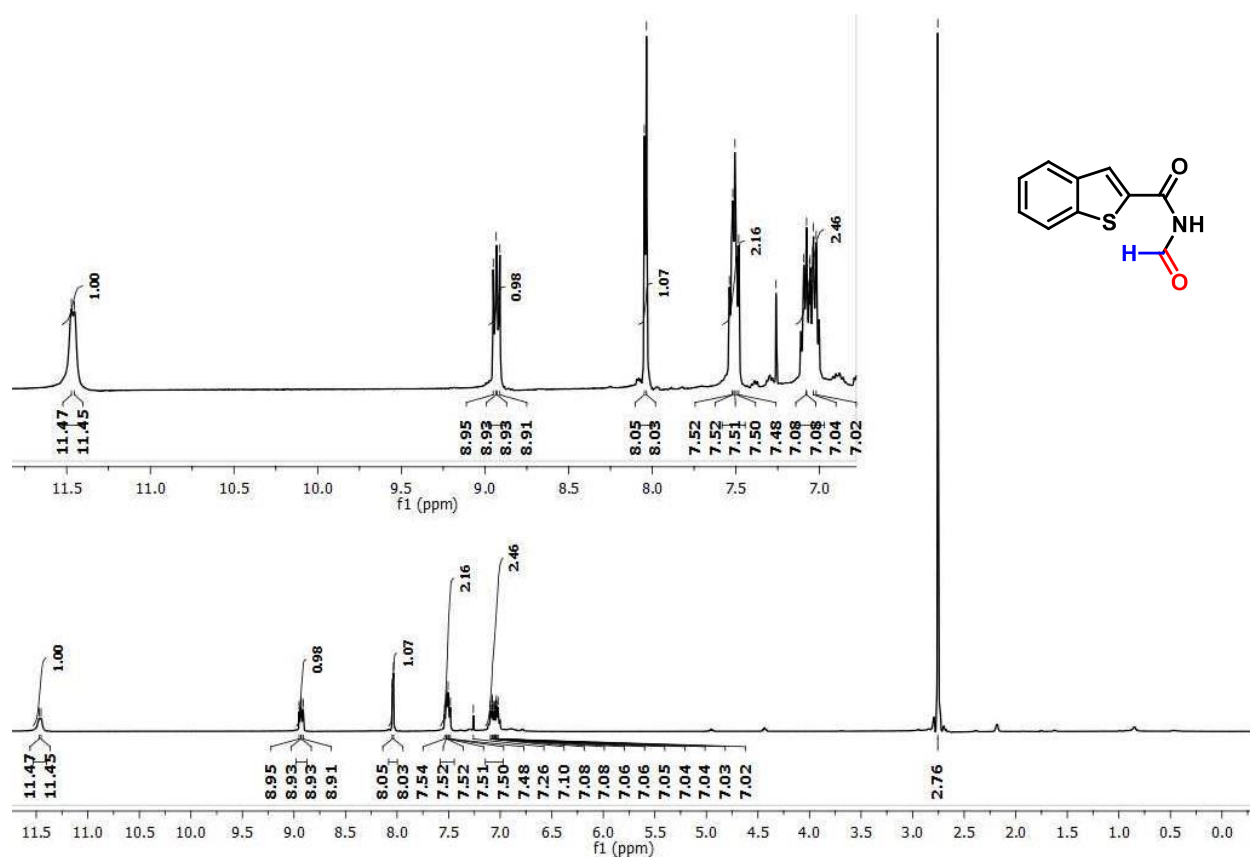

**Fig. S51.**  $^{13}\text{C}$  NMR spectrum ( $\text{CDCl}_3 + \text{DMSO-d}_6$ ) of N-formylbenzo[b]thiophene-2-carboxamide (**4r**):

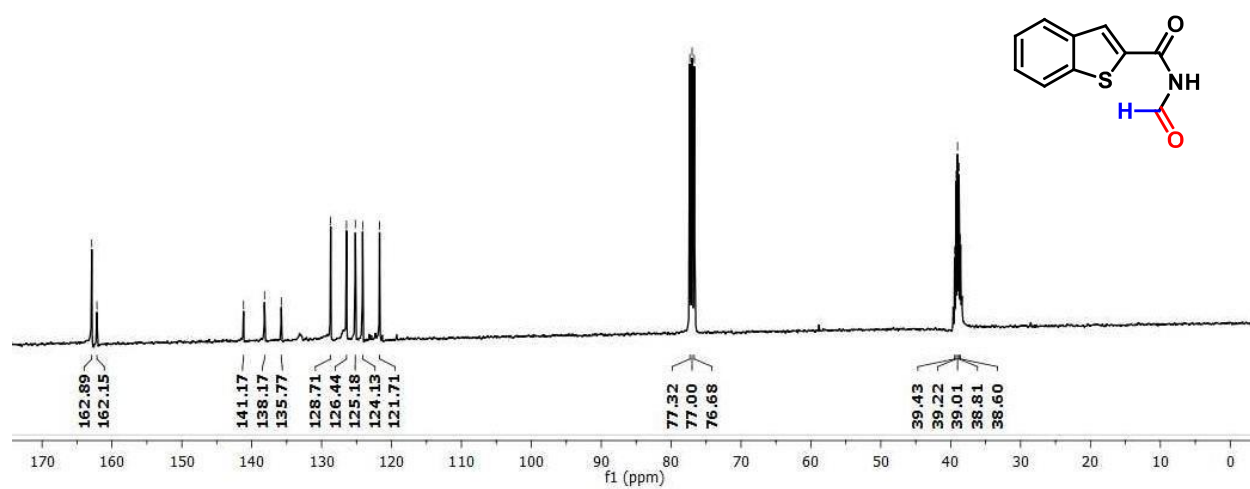

**Fig. S52.**  $^1\text{H}$  NMR spectrum ( $\text{CDCl}_3$ ) of 1,1,1,3,3,3-hexaphenyldisiloxane (**7**):

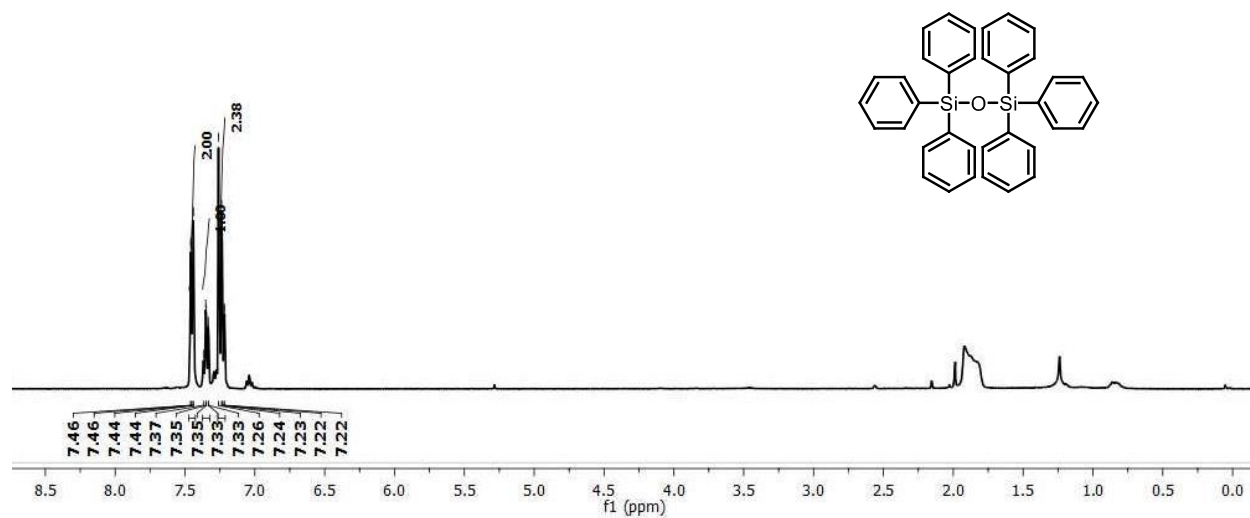

**Fig. S53.**  $^{13}\text{C}$  NMR spectrum ( $\text{CDCl}_3$ ) of 1,1,1,3,3,3-hexaphenyldisiloxane (**7**):

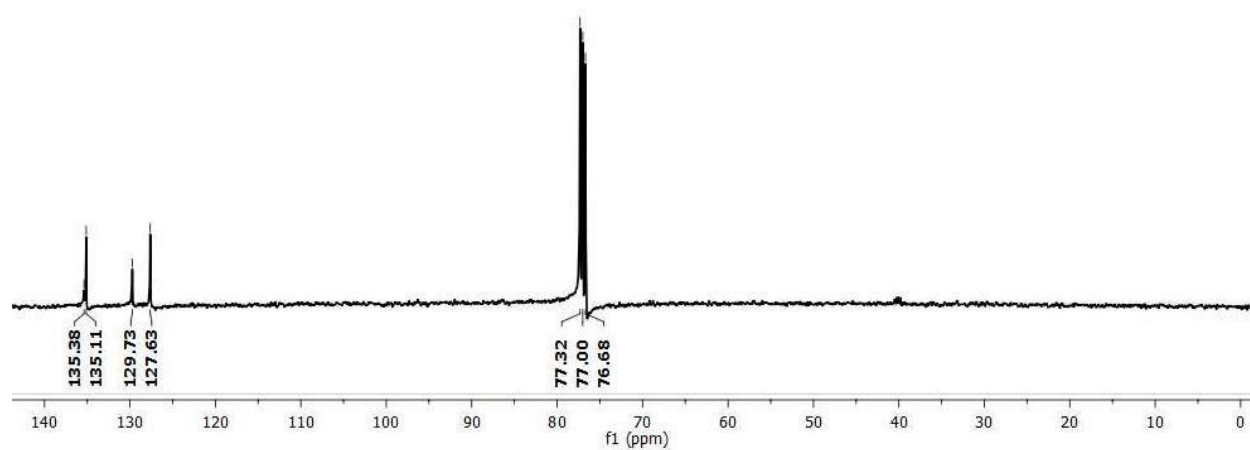

**Fig. S54.**  $^{29}\text{Si}$  spectrum ( $\text{CDCl}_3$ ) of 1,1,1,3,3,3-hexaphenyldisiloxane (**7**):

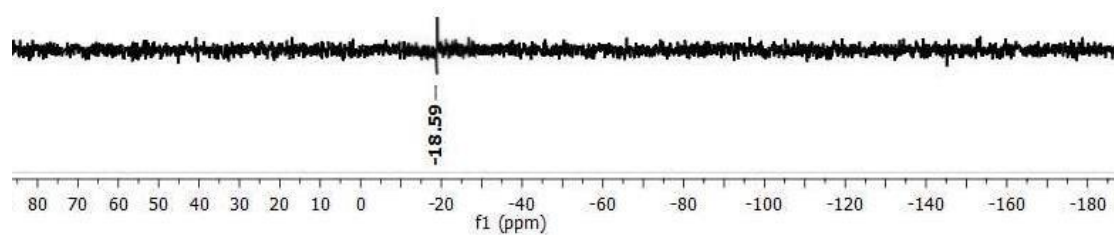

## VIII. References.

1. R. C. Haddon, R. Rayford and A. M. Hirani, *J. Org. Chem.*, 1981, **46**, 4587-4588.
2. S. R. Roy, A. Nijamudheen, A. Pariyar, P. Vardhanapu, A. Ghosh, P. K. Mandal, A. Datta and S. K. Mandal, *ACS Catal.*, 2014, **4**, 4307-4319.
3. J. Qiu, S. Gao, C. Li, L. Zhang, Z. Wang, X. Wang and K. Ding, *Chem. Eur. J.* 2019, **25**, 13874 –13878.
4. G. R. Fulmer, A. J. M. Miller, N. H. Sherden, H. E. Gottlieb, A. Nudelman, B. M. Stolz, J. E. Bercaw, K. L. Goldberg, *Organometallics*, 2010, **29**, 2176–2179.
5. Z. Niu, S. Lin, Z. Dong, H. Sun, F. Liang and J. Zhang, *Org. Biomol. Chem.*, 2013, **11**, 2460-2465.
6. A. Schnyder and A. F. Indolese, *J. Org. Chem.*, 2002, **67**, 594-597.
7. P. K. Hota, S. C. Sau and S. K. Mandal, *S. ACS Catal.*, 2018, **8**, 11999-12003.
8. M. Sambaiah, R. Gudipati, K. S. Kumar, S. Yennam and M. Behera, *Tetrahedron Letters*, 2016, **57**, 403-406.
9. O. V. Dolomanov, L. J. Bourhis, R. J. Gildea, J. A. K. Howard, H. Puschmann, *J. Appl. Cryst.* 2009, **42**, 339-341.
10. G. M. Sheldrick, *Acta Cryst.*, 2015, **A71**, 3–8.
11. G. M. Sheldrick, *Acta Cryst.*, 2015, **C71**, 3-8.
12. Frisch, M. J. *et al.* Gaussian 16, Revision B.01, Fox, Gaussian, Inc., Wallingford CT, 2016.
13. A. D. Becke, *J. Chem. Phys.*, 1993, **98**, 5648-5652.
14. Y. Yang, M. N. Weaver and Jr. K. M. Merz, *J. Phys. Chem. A*, 2009, **1123**, 9843-9851.
